# Supplementary material
Source: PubMed Central journal article supplement (PMC30620)

# 3lzm ver 1411

ALPHA CARBON DIFFERENCE DISTANCE

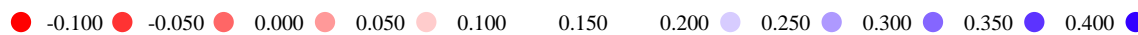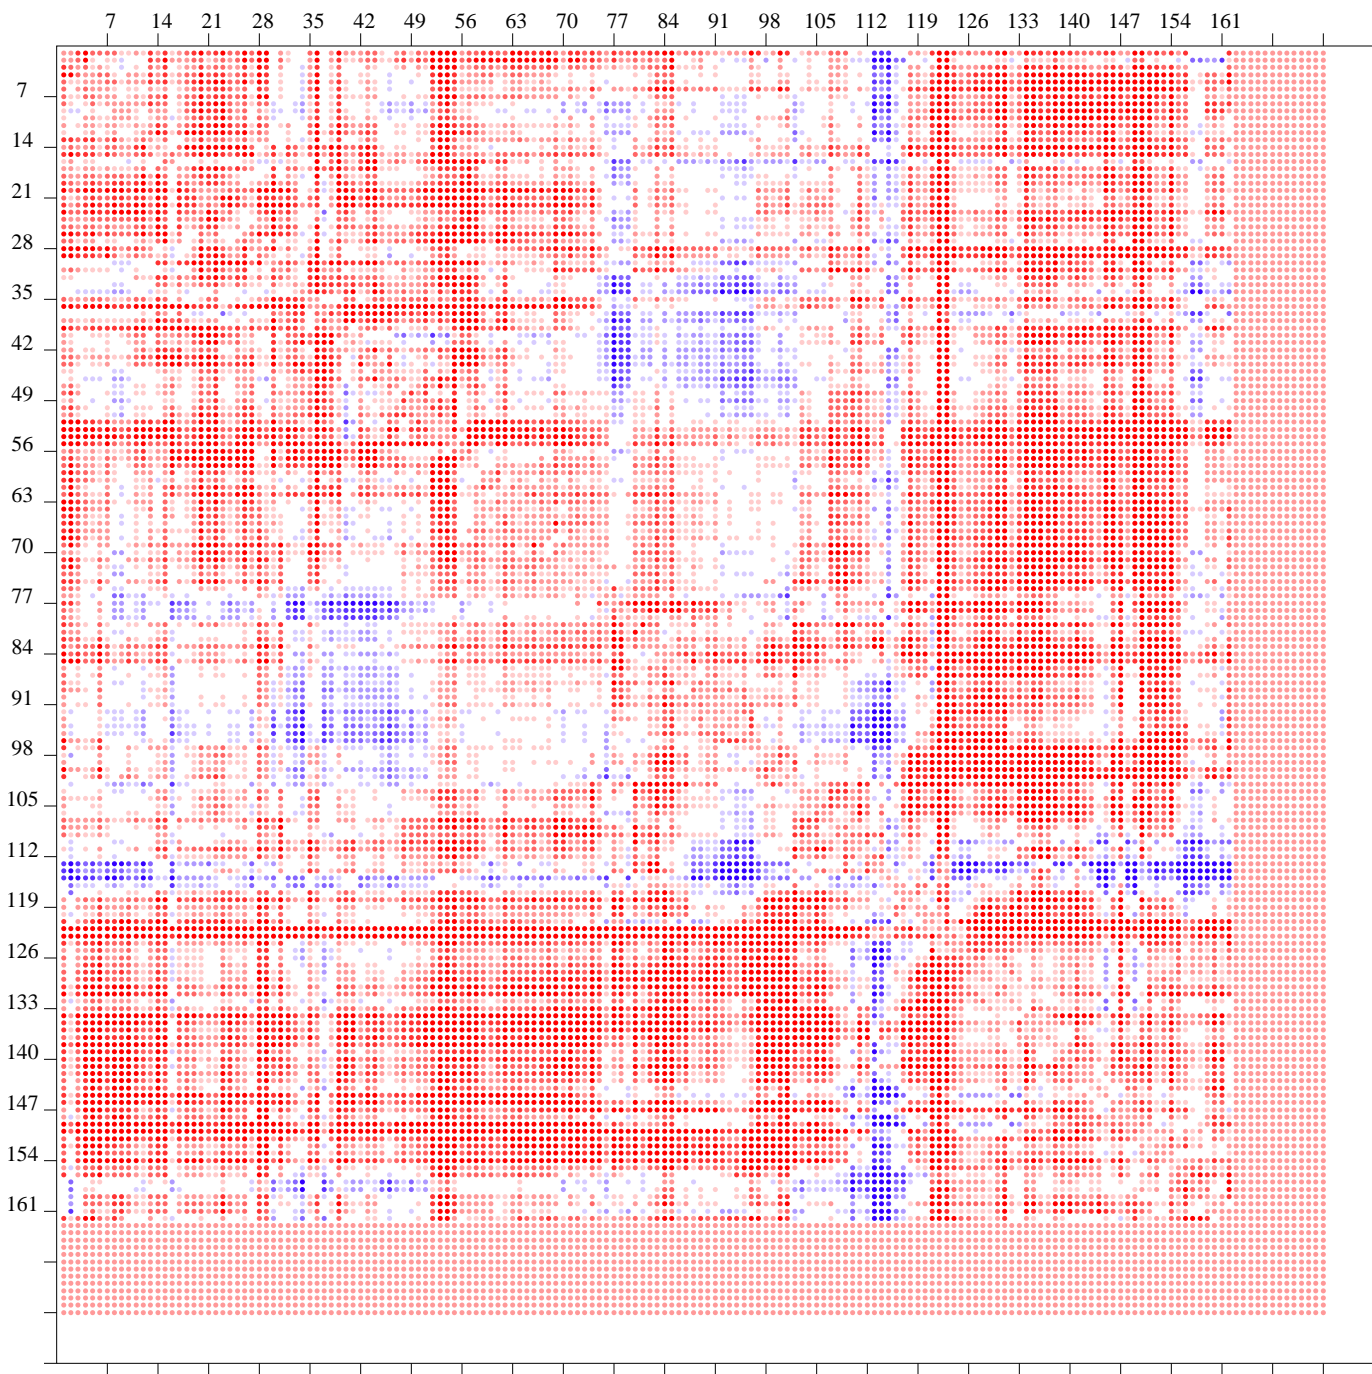

# 3lzm ver 1111

ALPHA CARBON DIFFERENCE DISTANCE

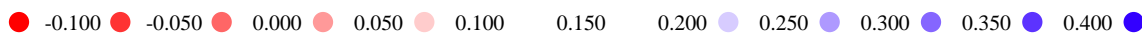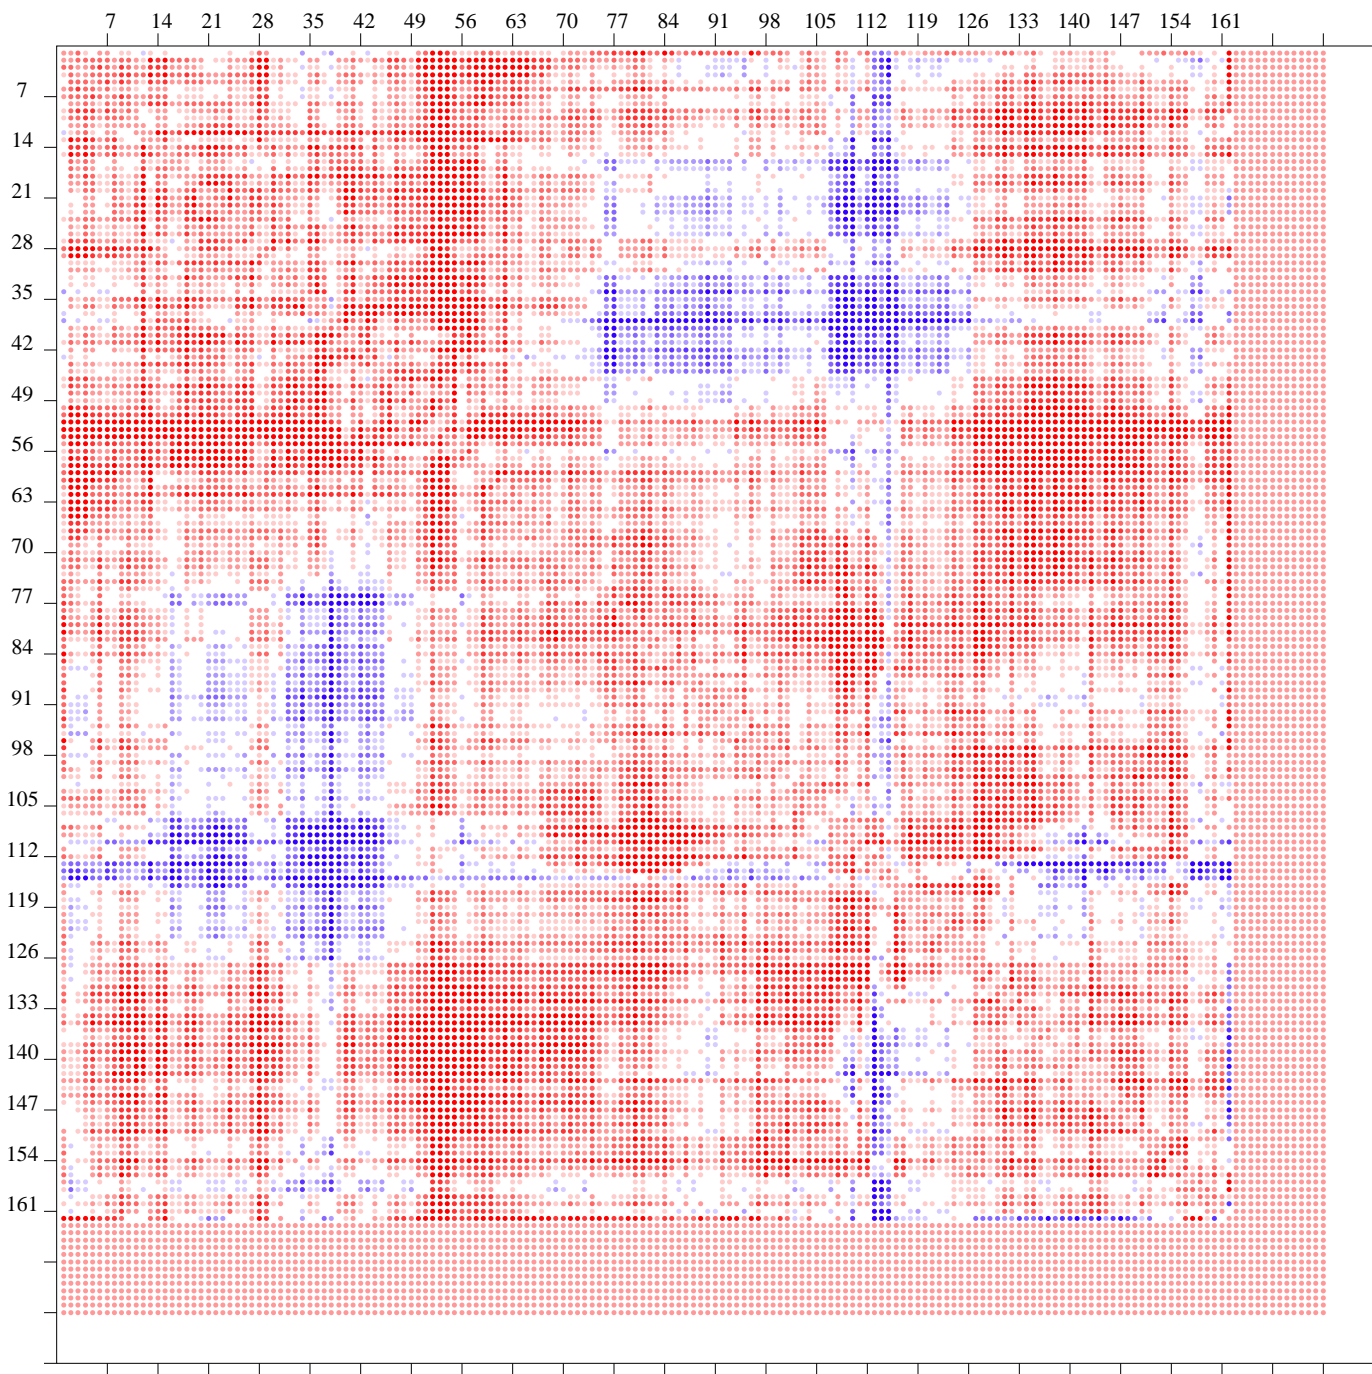

# 3lzm ver 2271

ALPHA CARBON DIFFERENCE DISTANCE

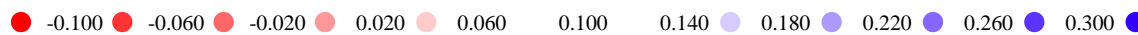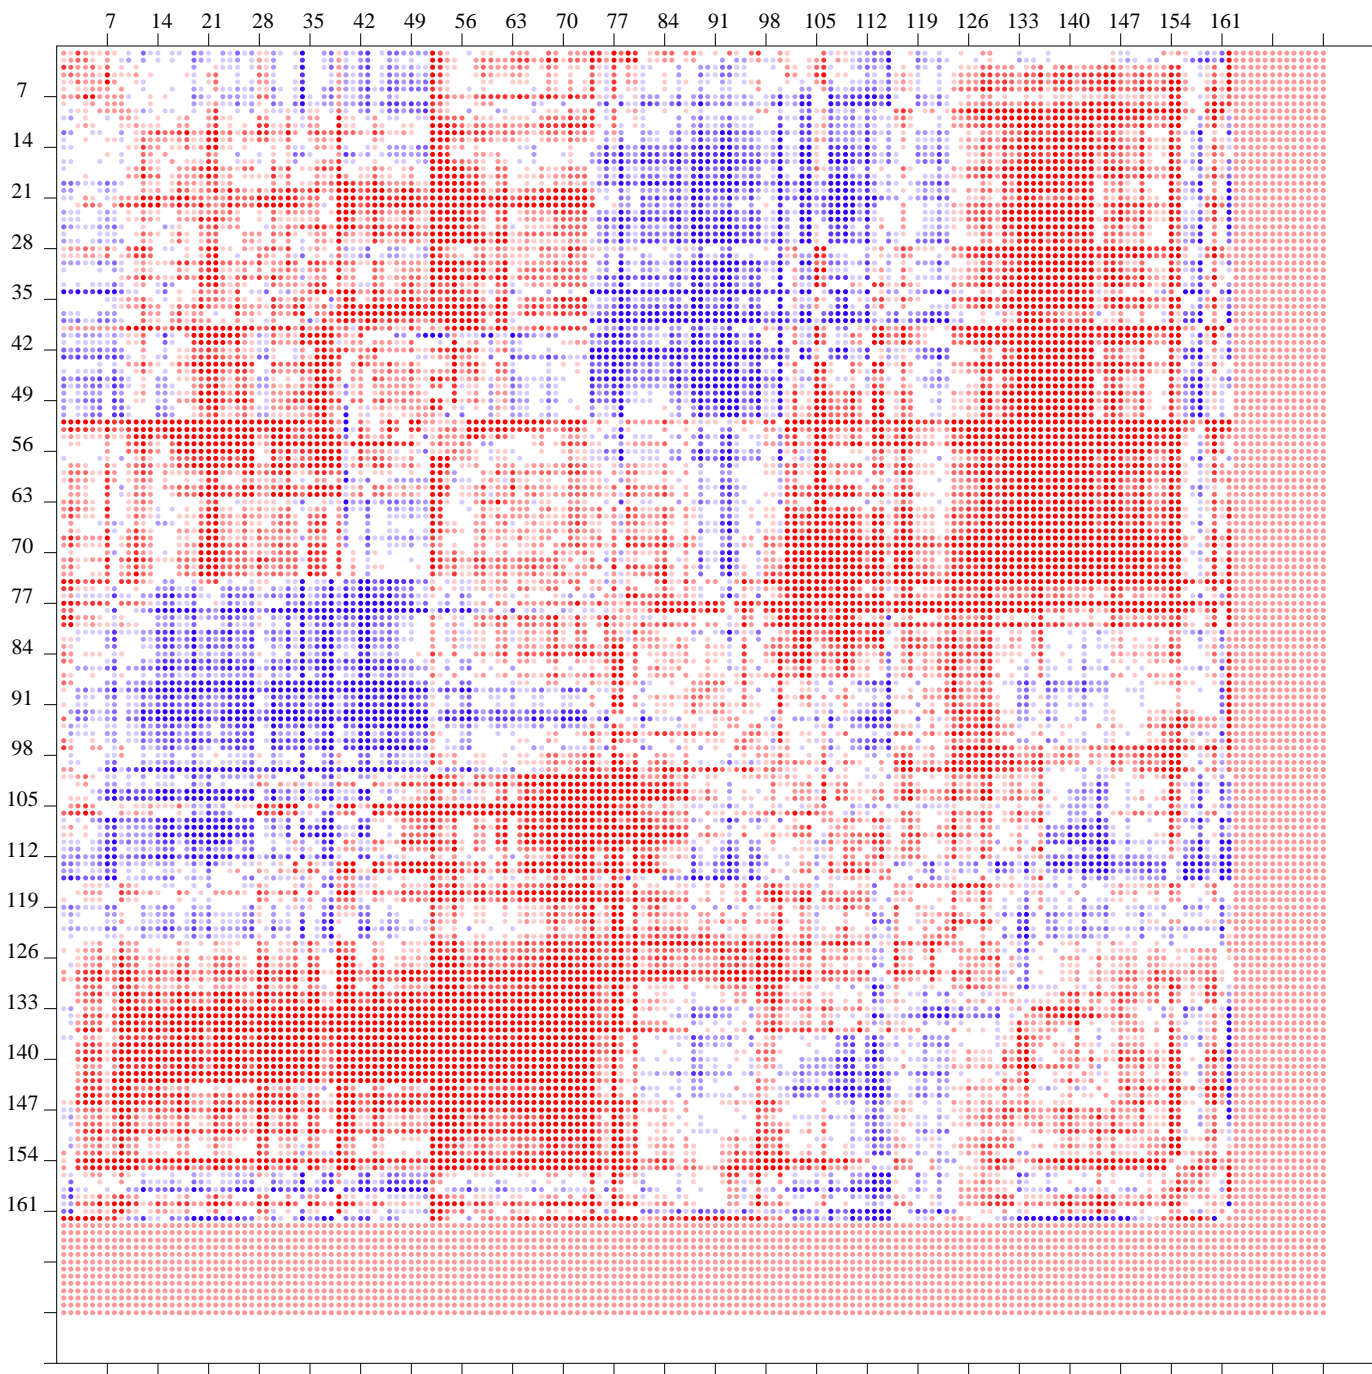

3lzm ver 1381

ALPHA CARBON DIFFERENCE DISTANCE

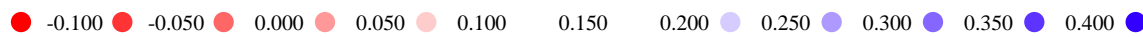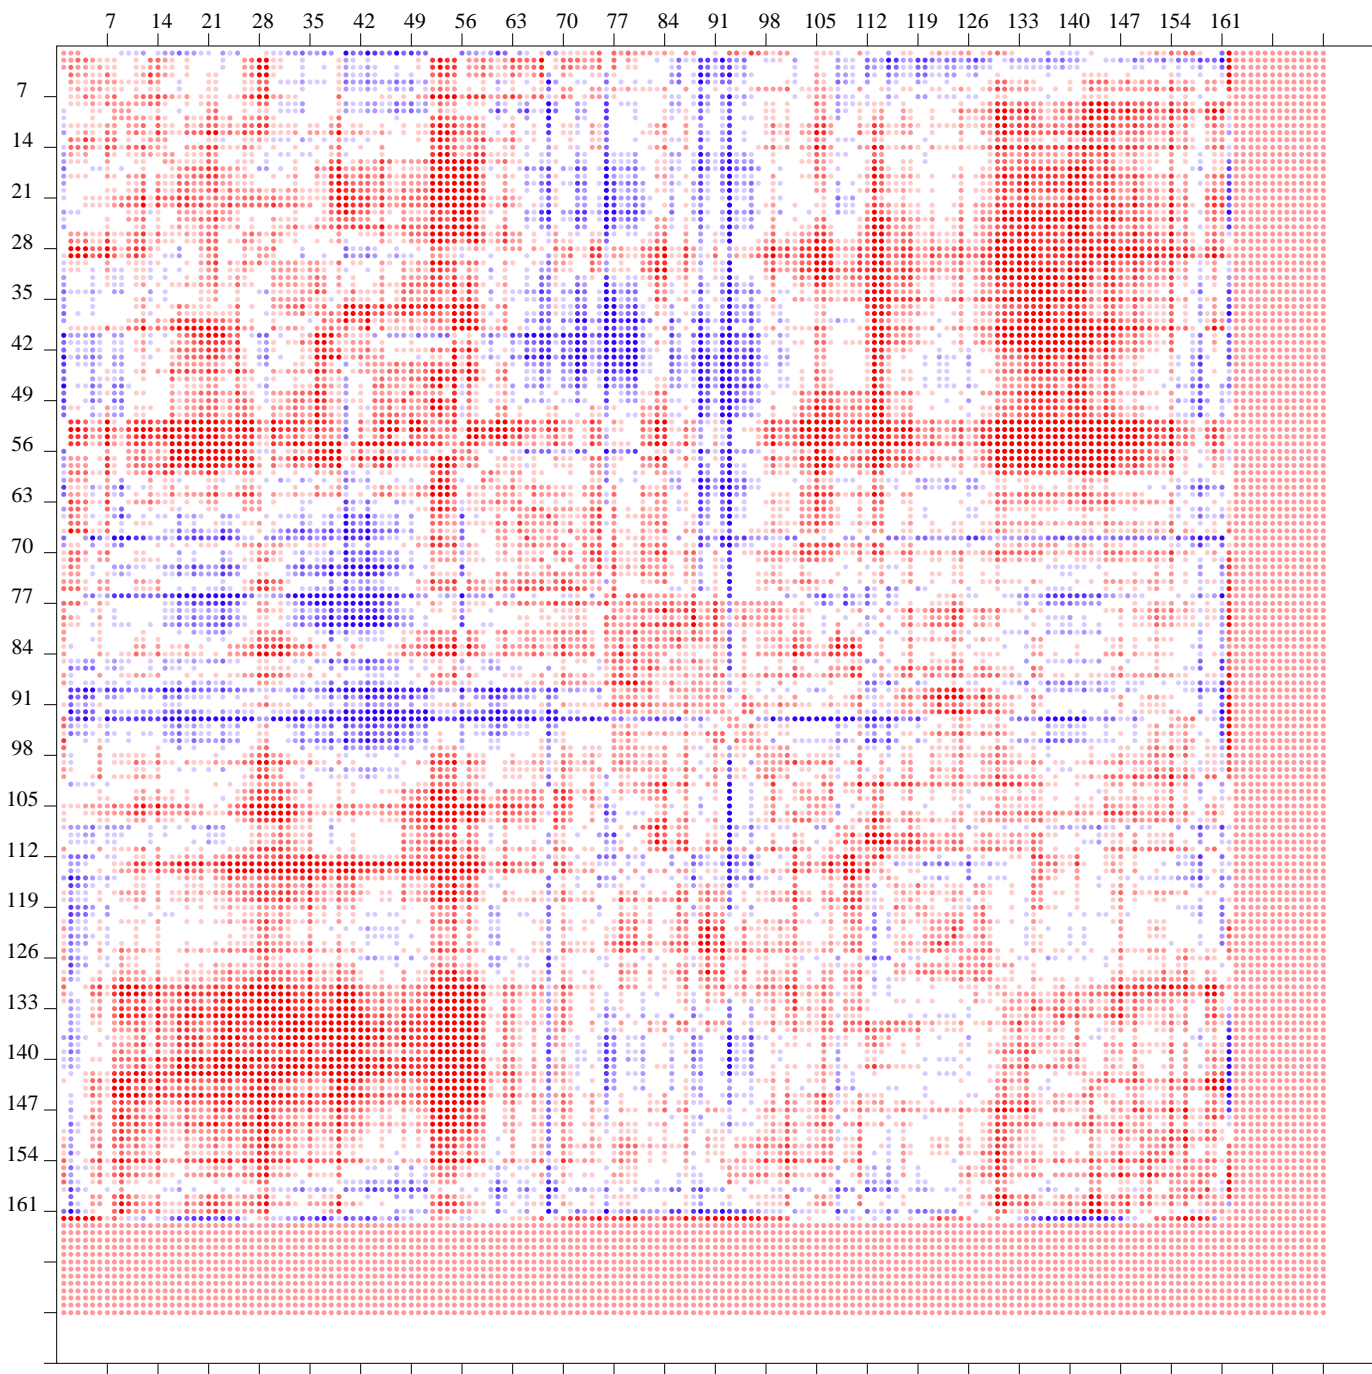

# 3lzm ver 2381

ALPHA CARBON DIFFERENCE DISTANCE

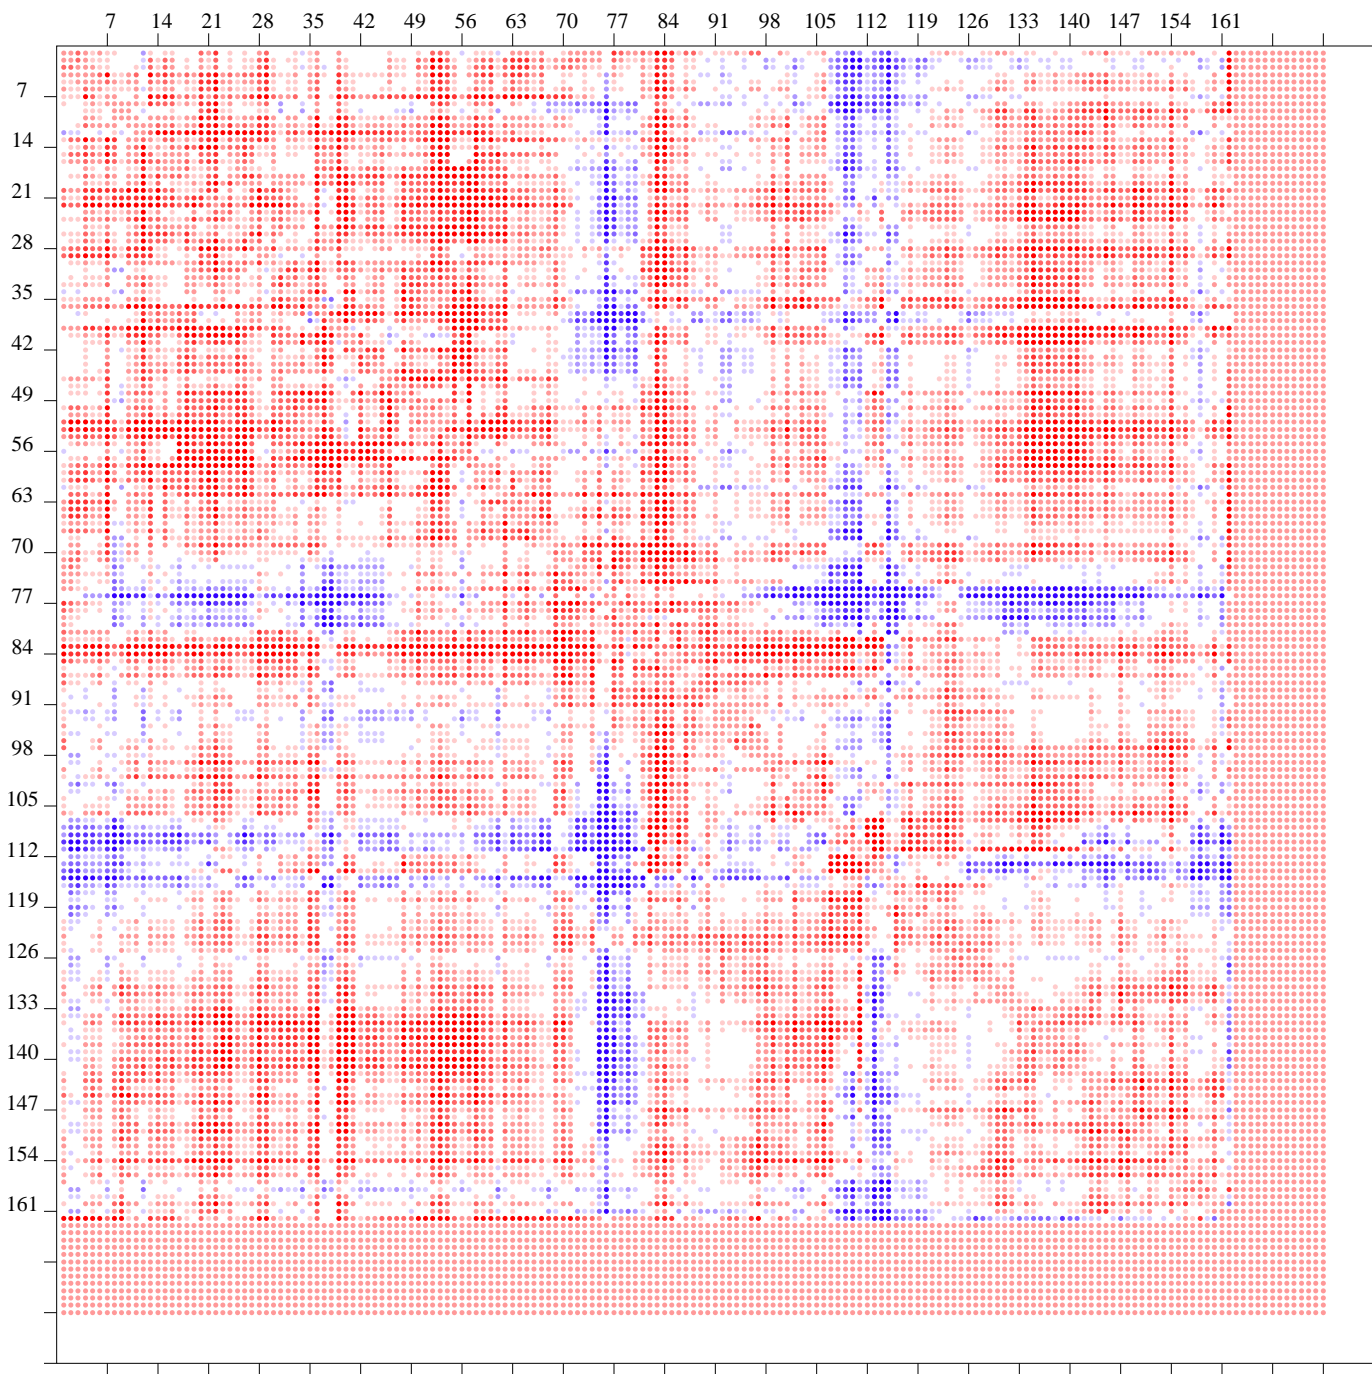

# 3lzm ver 237l

ALPHA CARBON DIFFERENCE DISTANCE

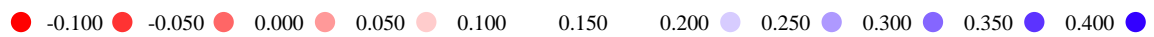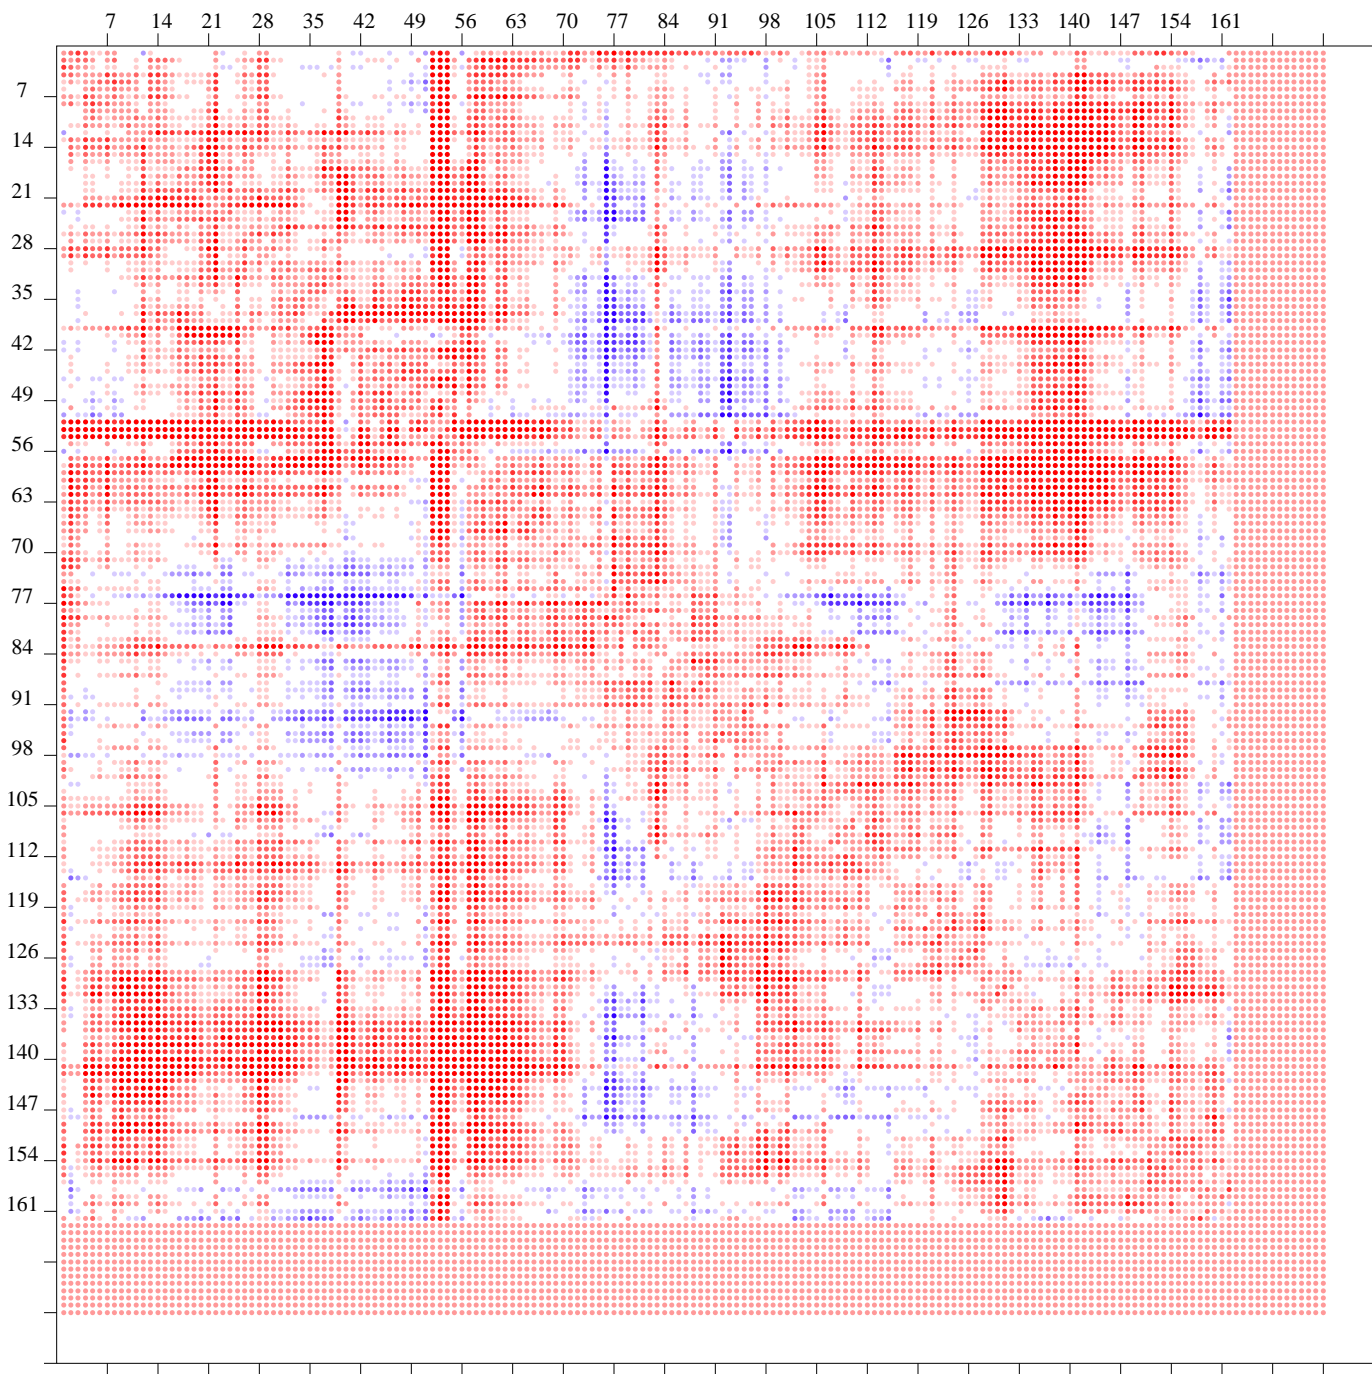

3lzm ver 2361

ALPHA CARBON DIFFERENCE DISTANCE

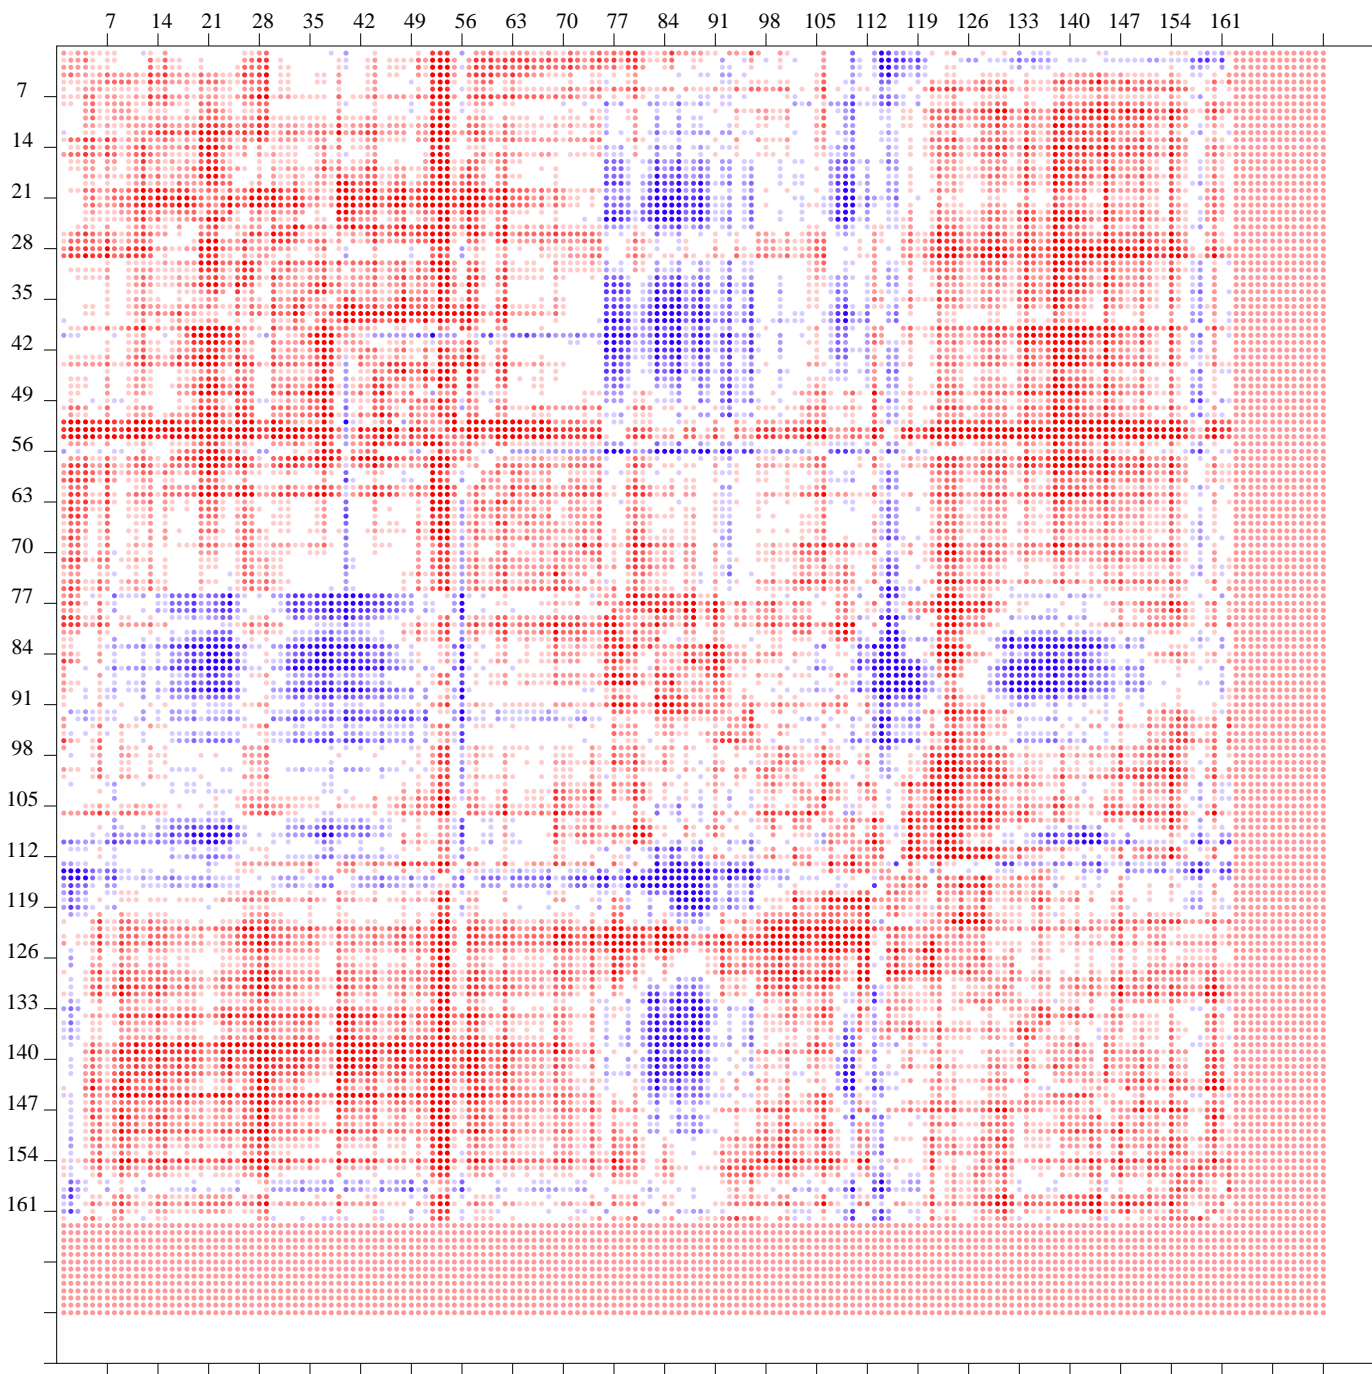

# 3lzm ver 2341

ALPHA CARBON DIFFERENCE DISTANCE

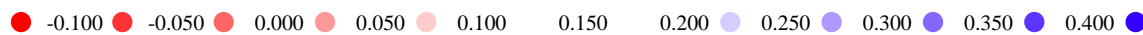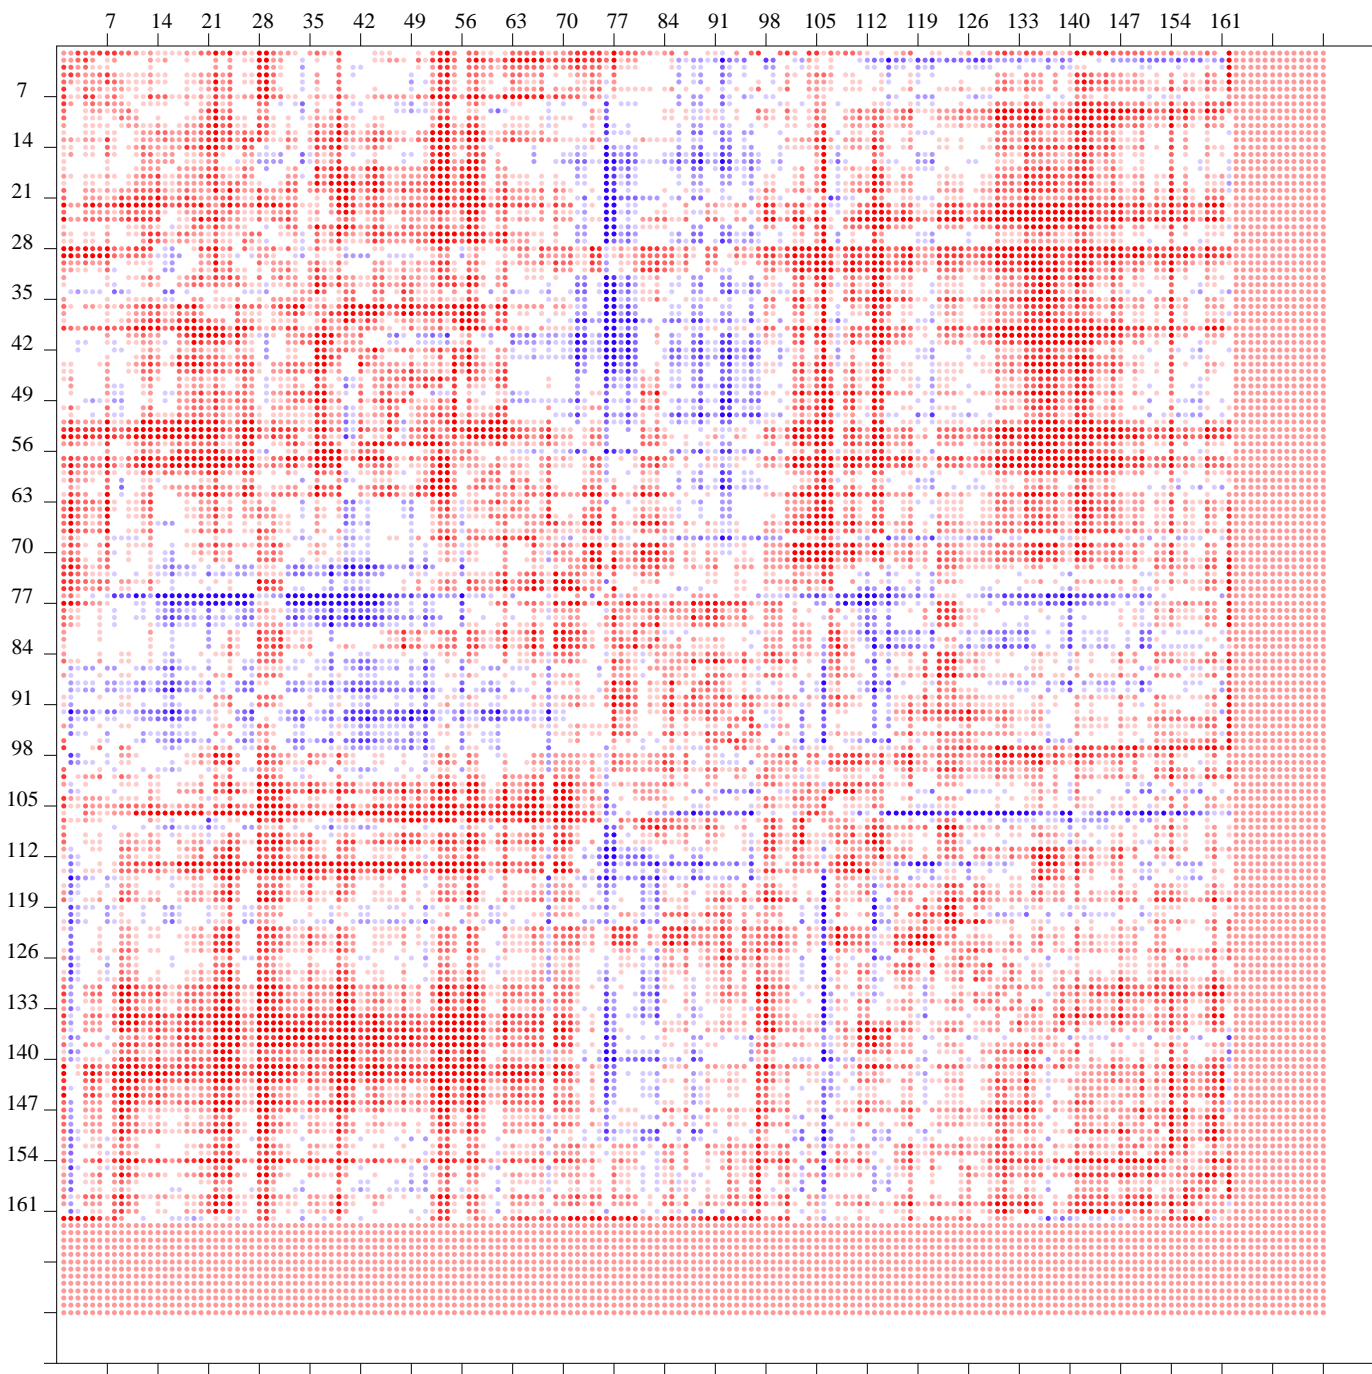



# 3lzm ver 247l

ALPHA CARBON DIFFERENCE DISTANCE

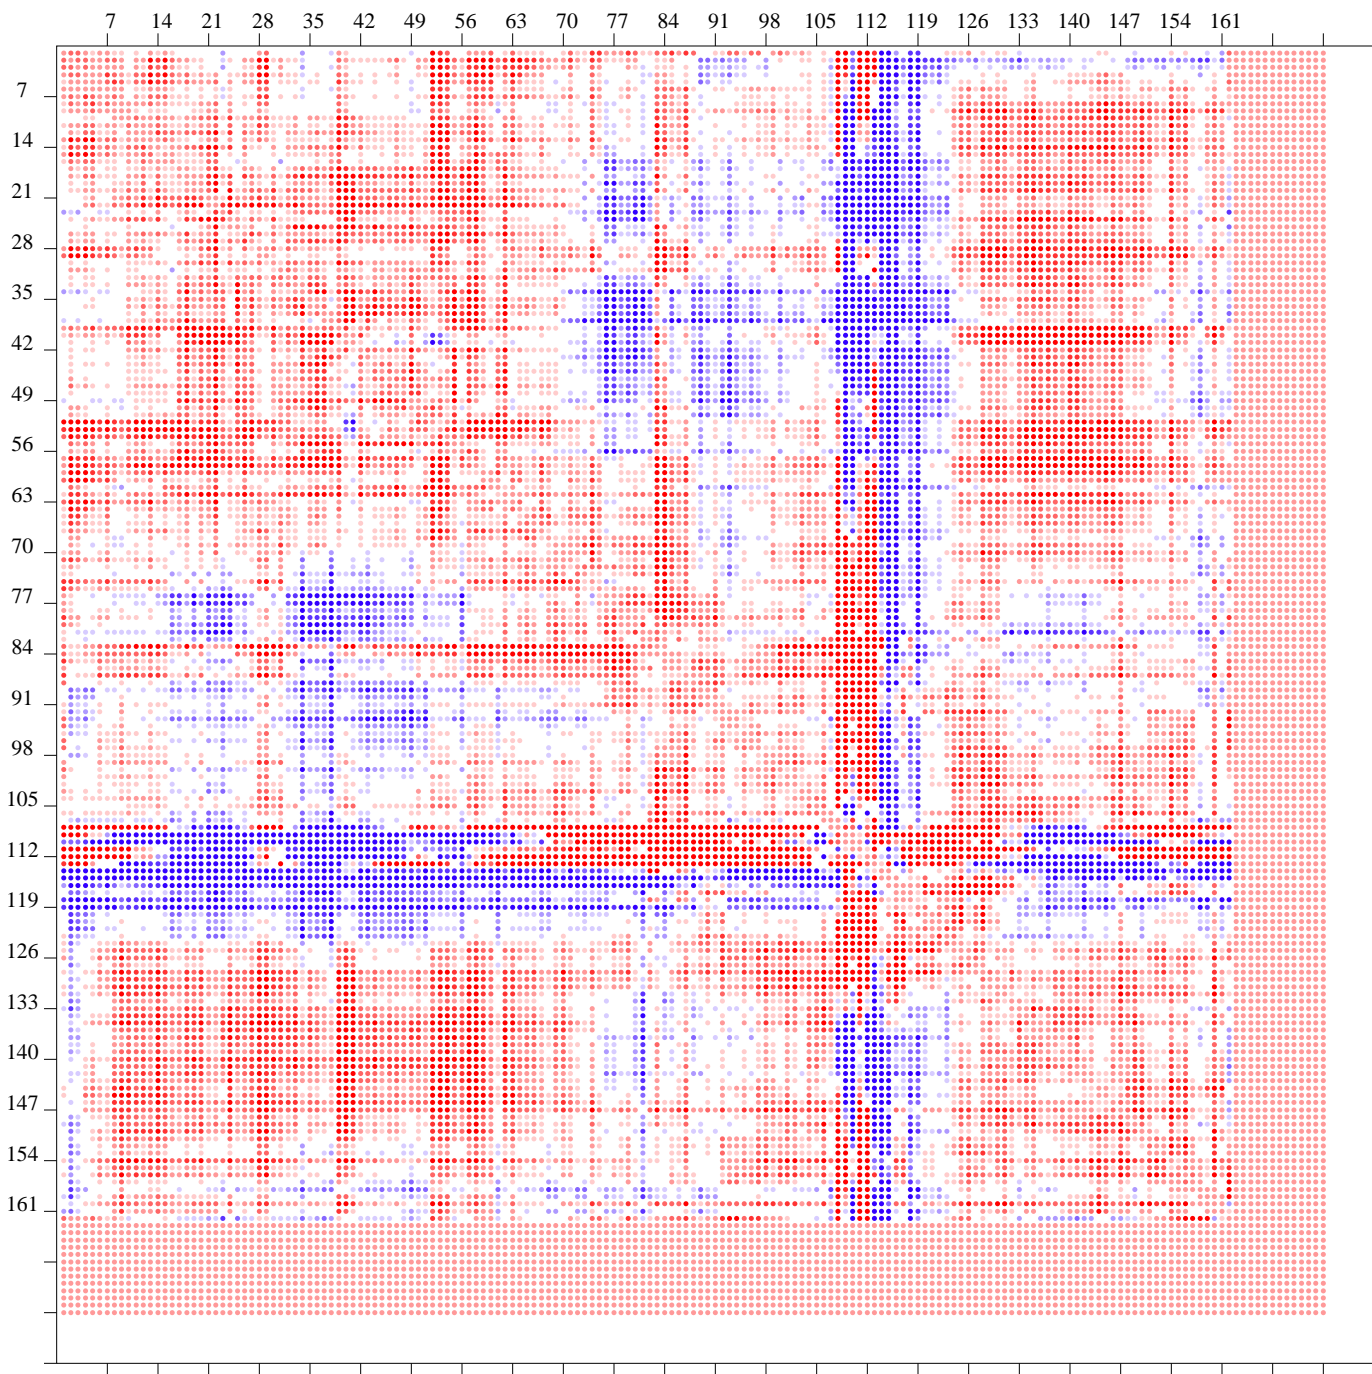

# 3lzm ver 2461

ALPHA CARBON DIFFERENCE DISTANCE

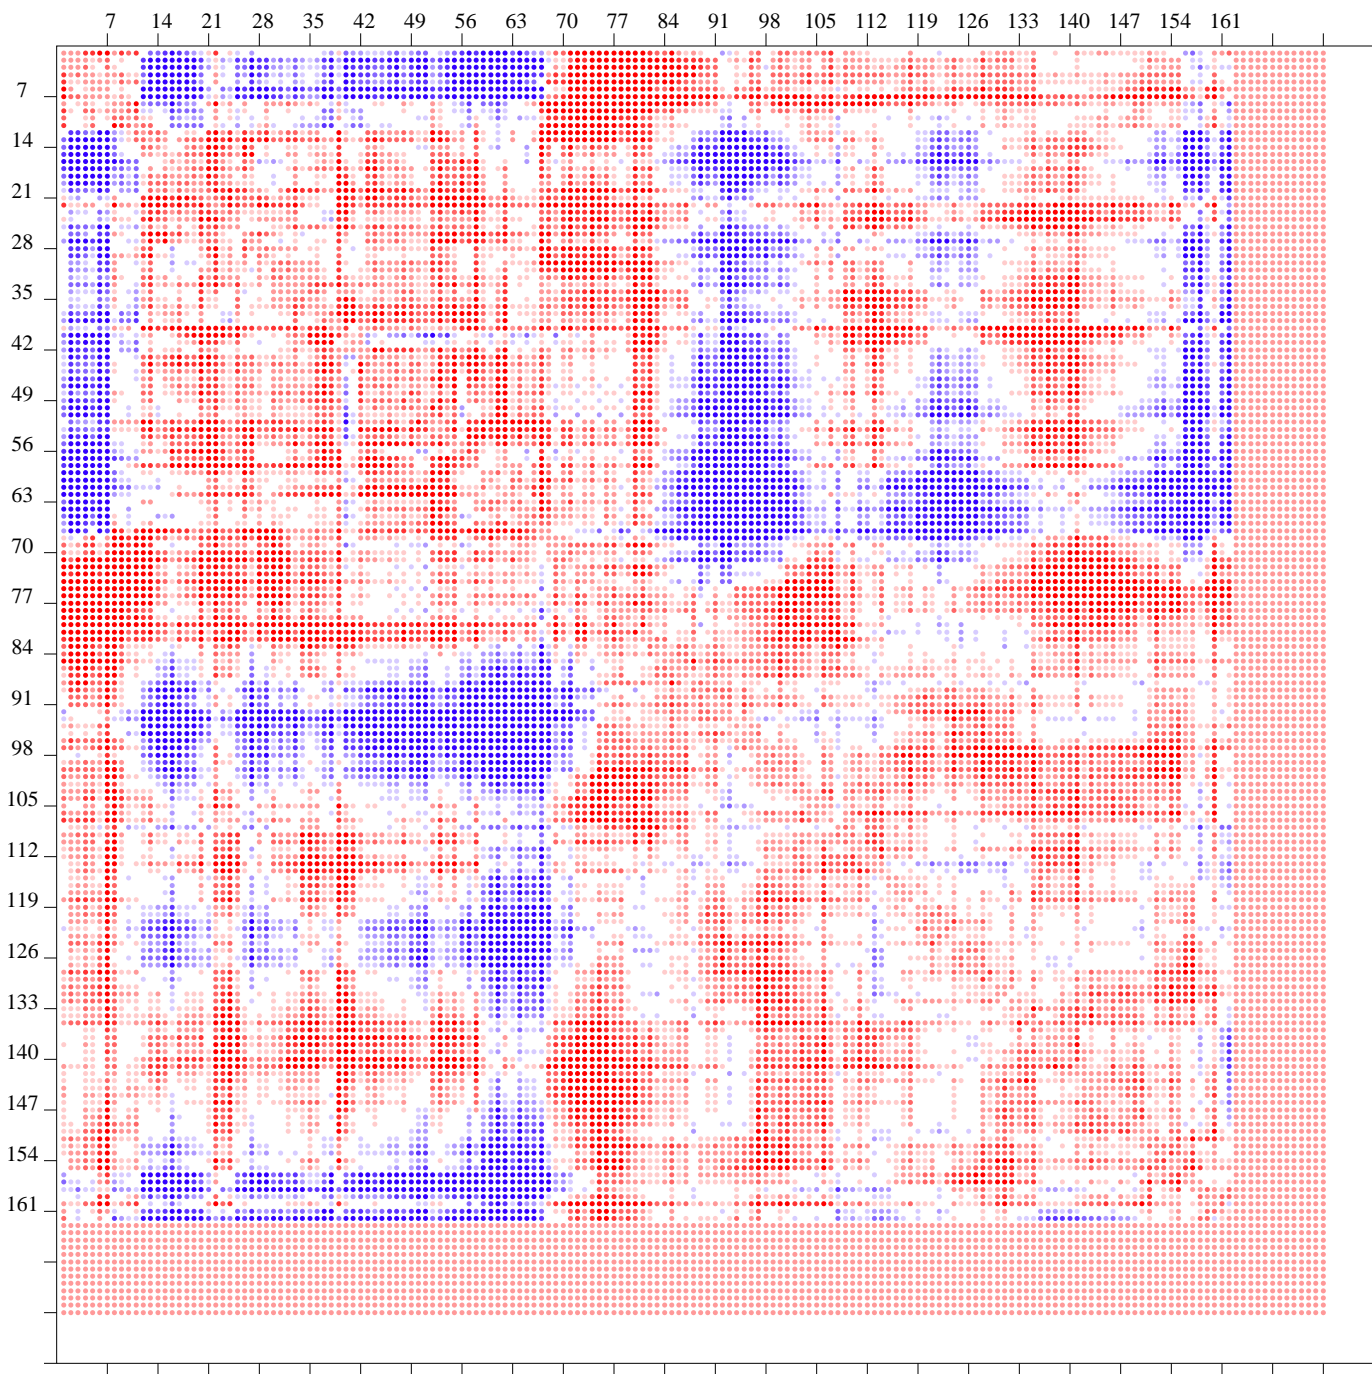

# 3lzm ver 2551

ALPHA CARBON DIFFERENCE DISTANCE

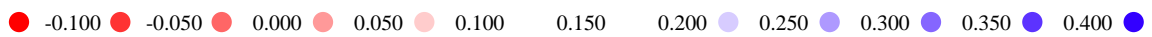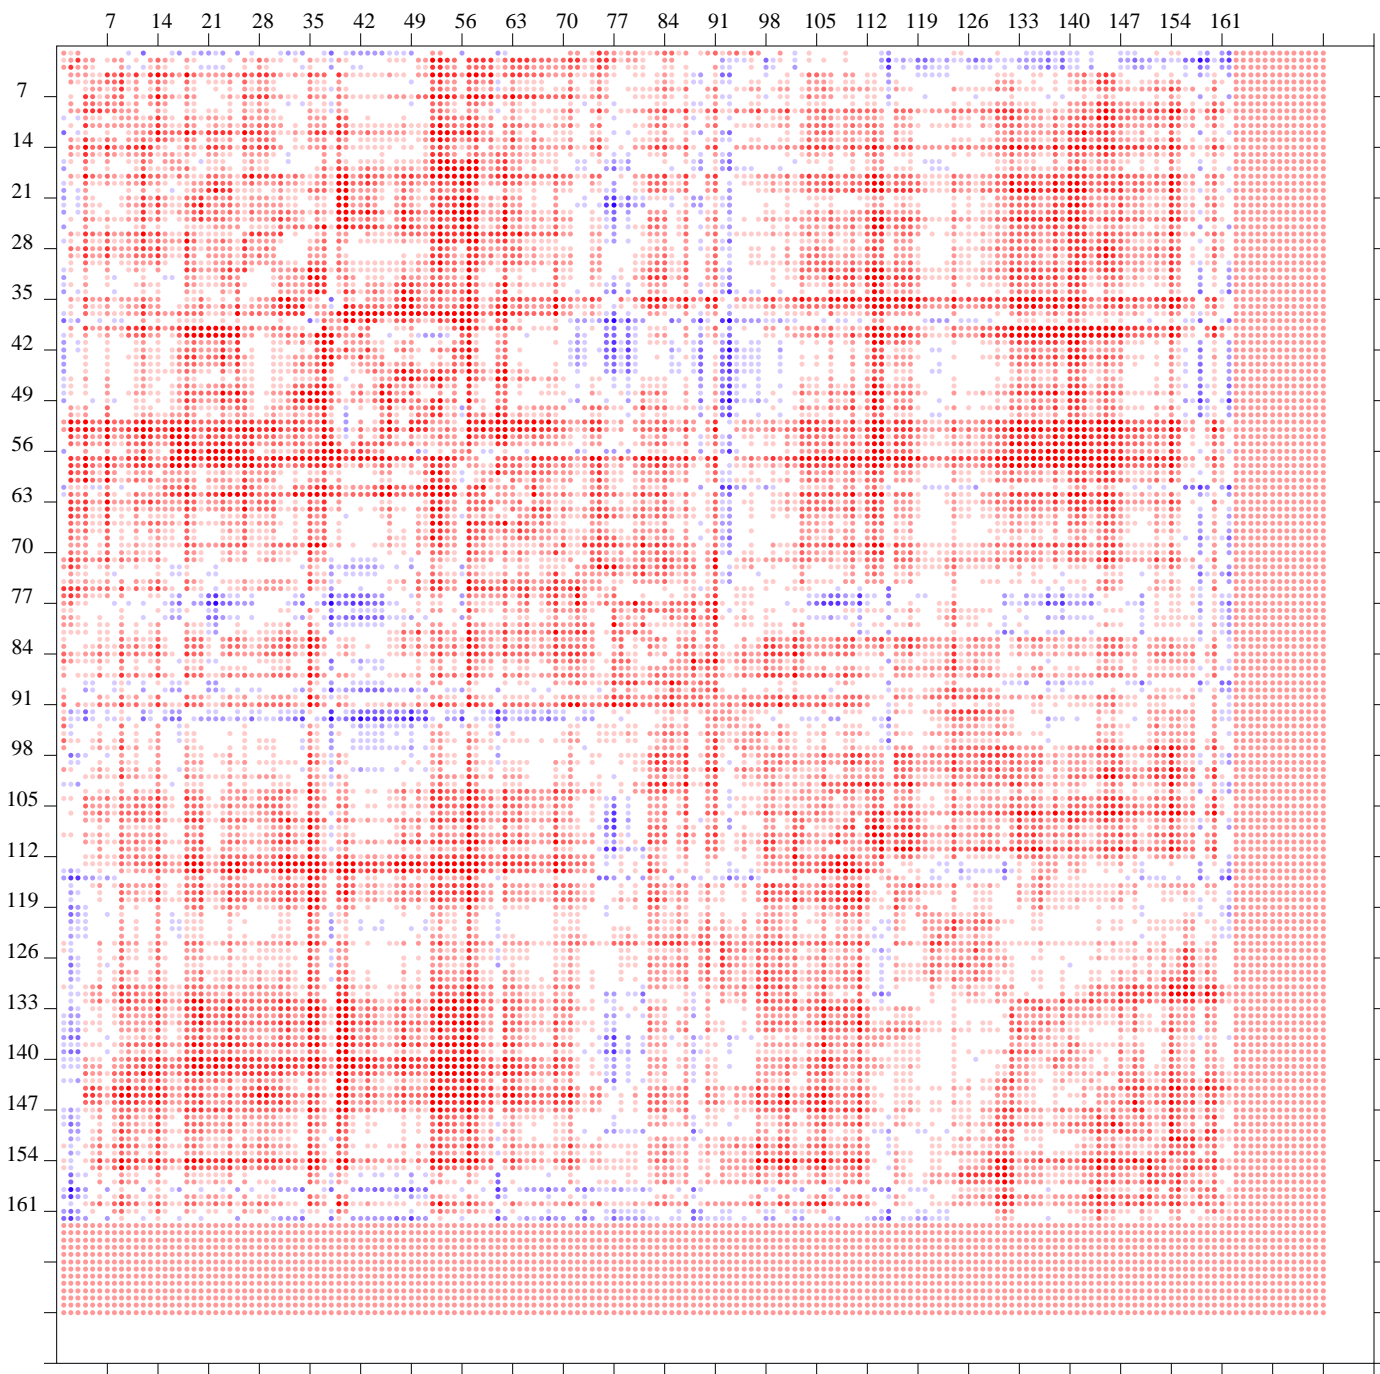

# 3lzm ver 2541

ALPHA CARBON DIFFERENCE DISTANCE

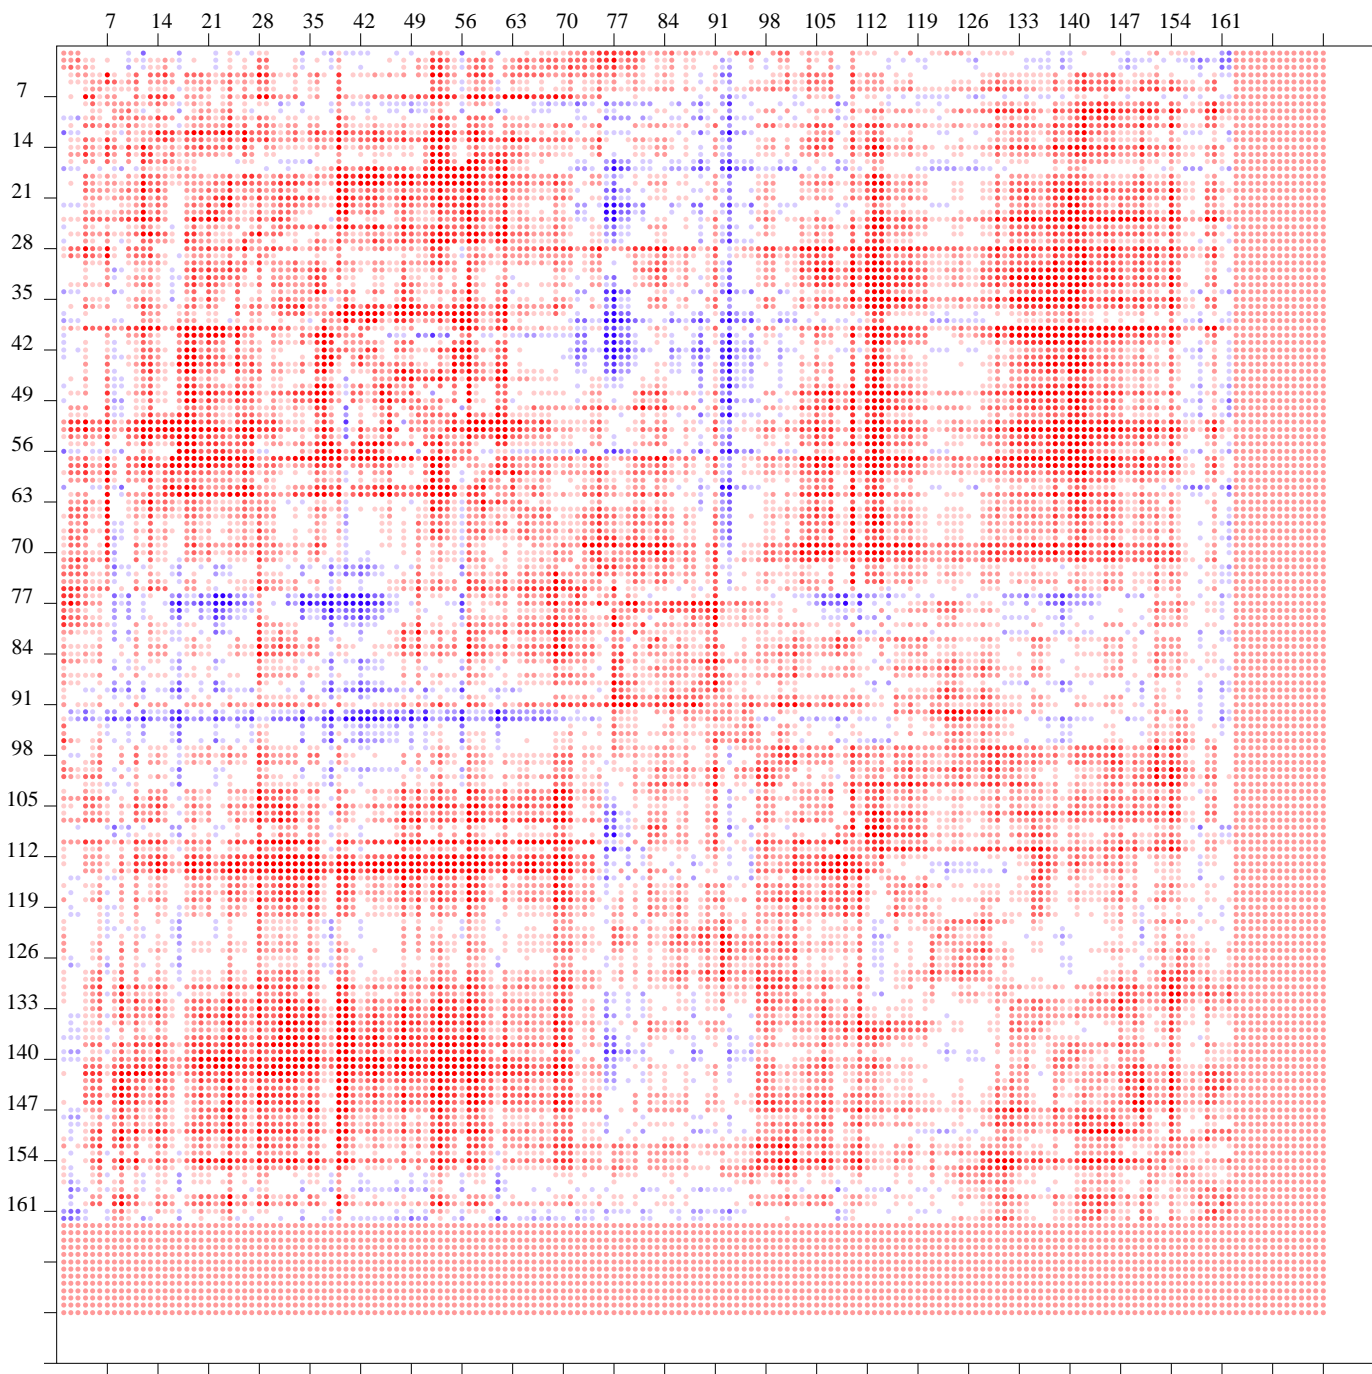

# 3lzm ver 2531

ALPHA CARBON DIFFERENCE DISTANCE

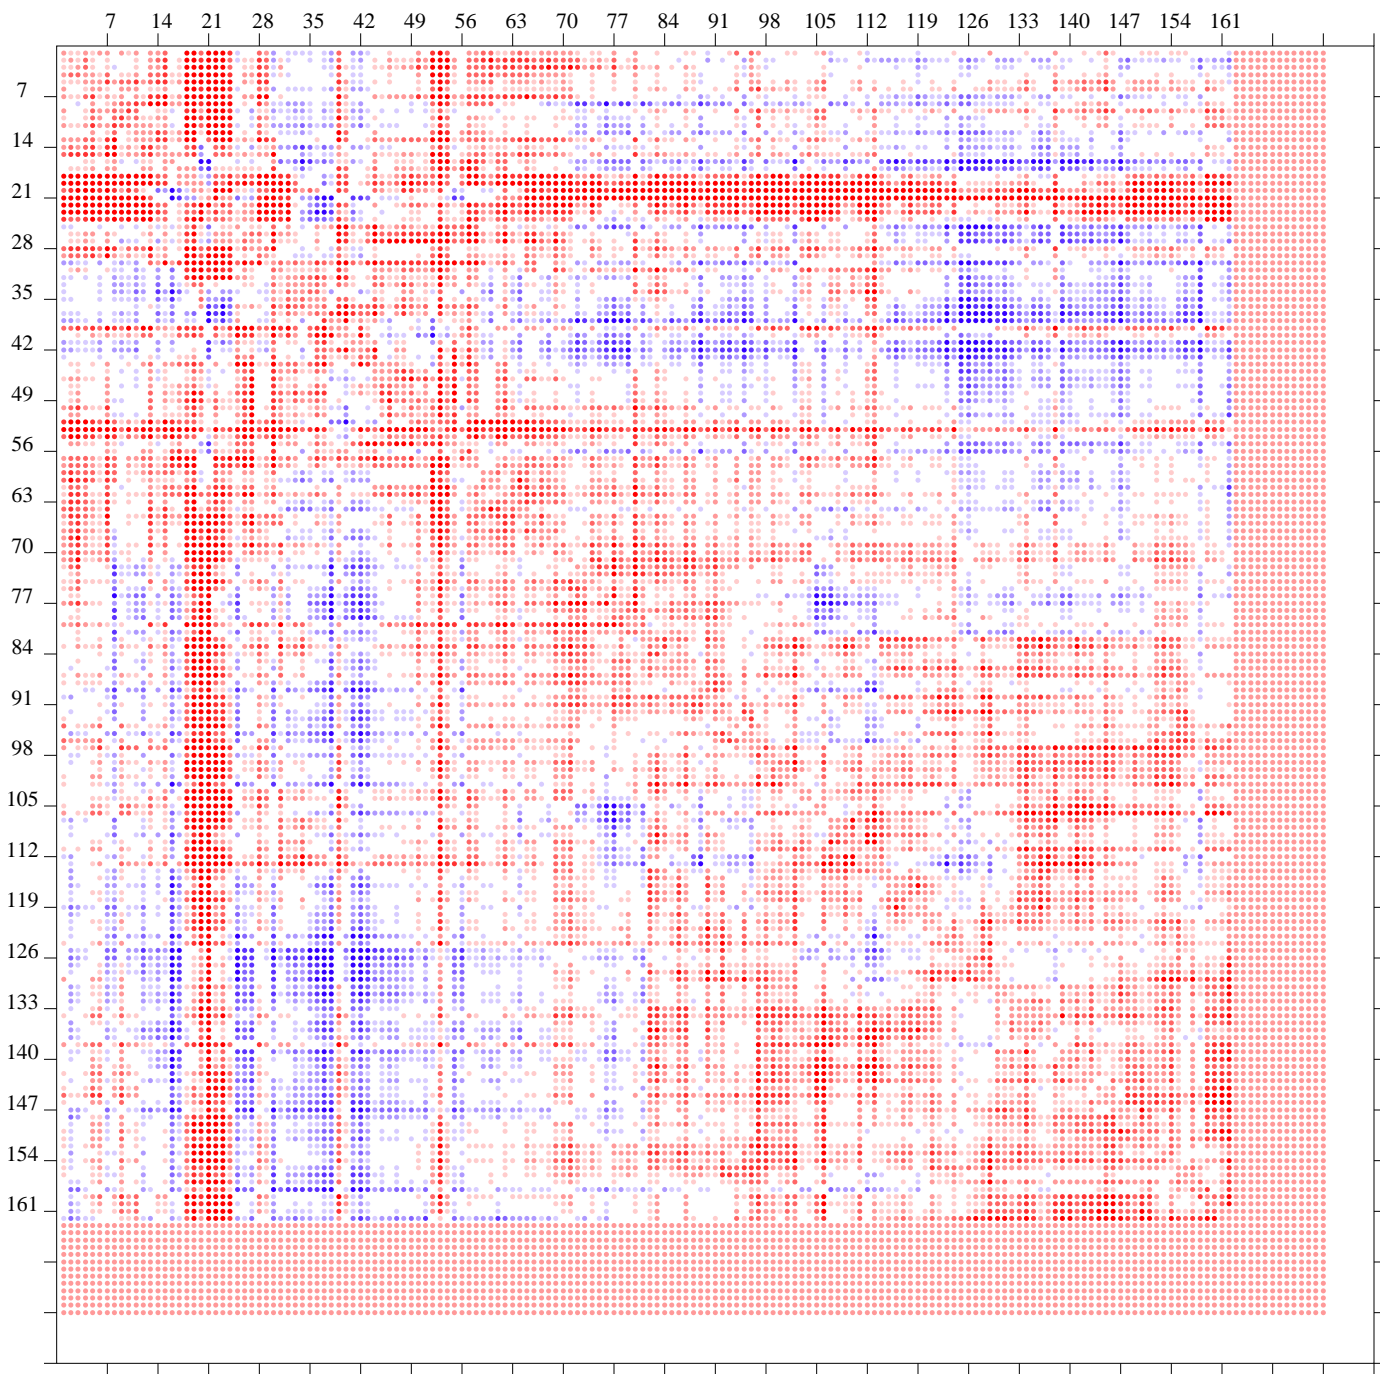

# 3lzm ver 1131

ALPHA CARBON DIFFERENCE DISTANCE

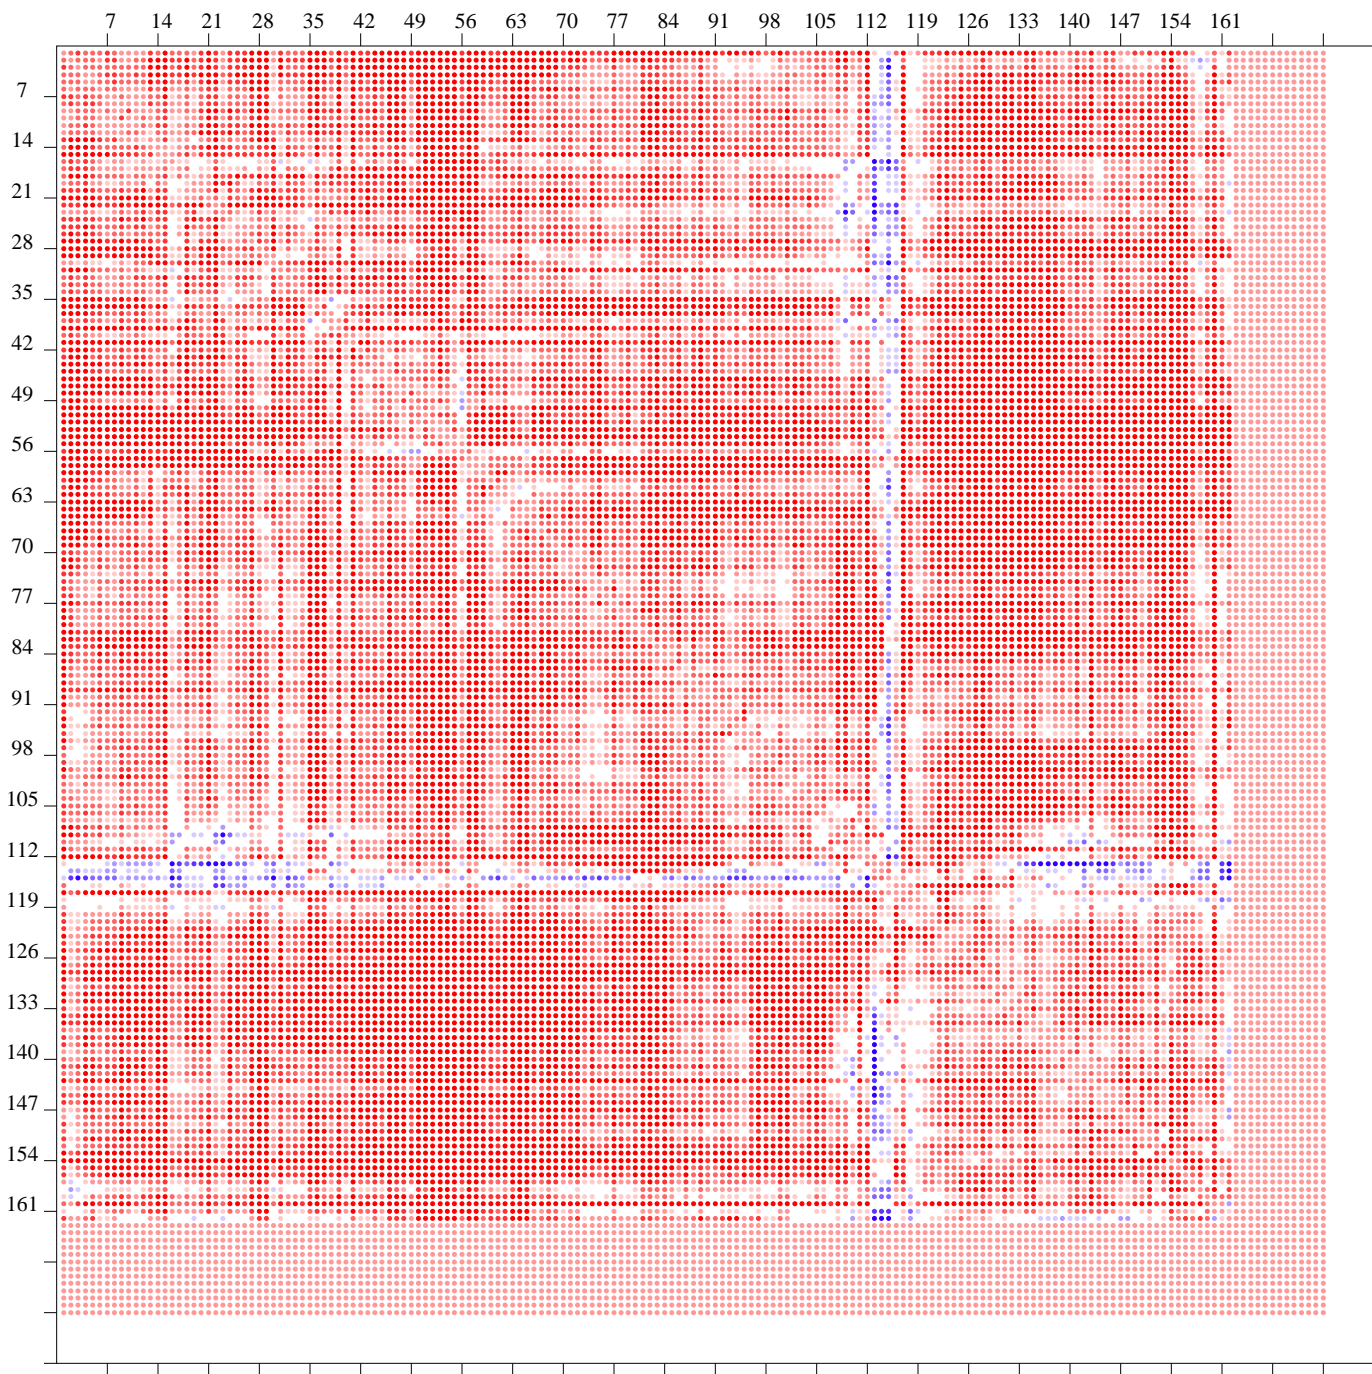

# 3lzm ver 1221

ALPHA CARBON DIFFERENCE DISTANCE

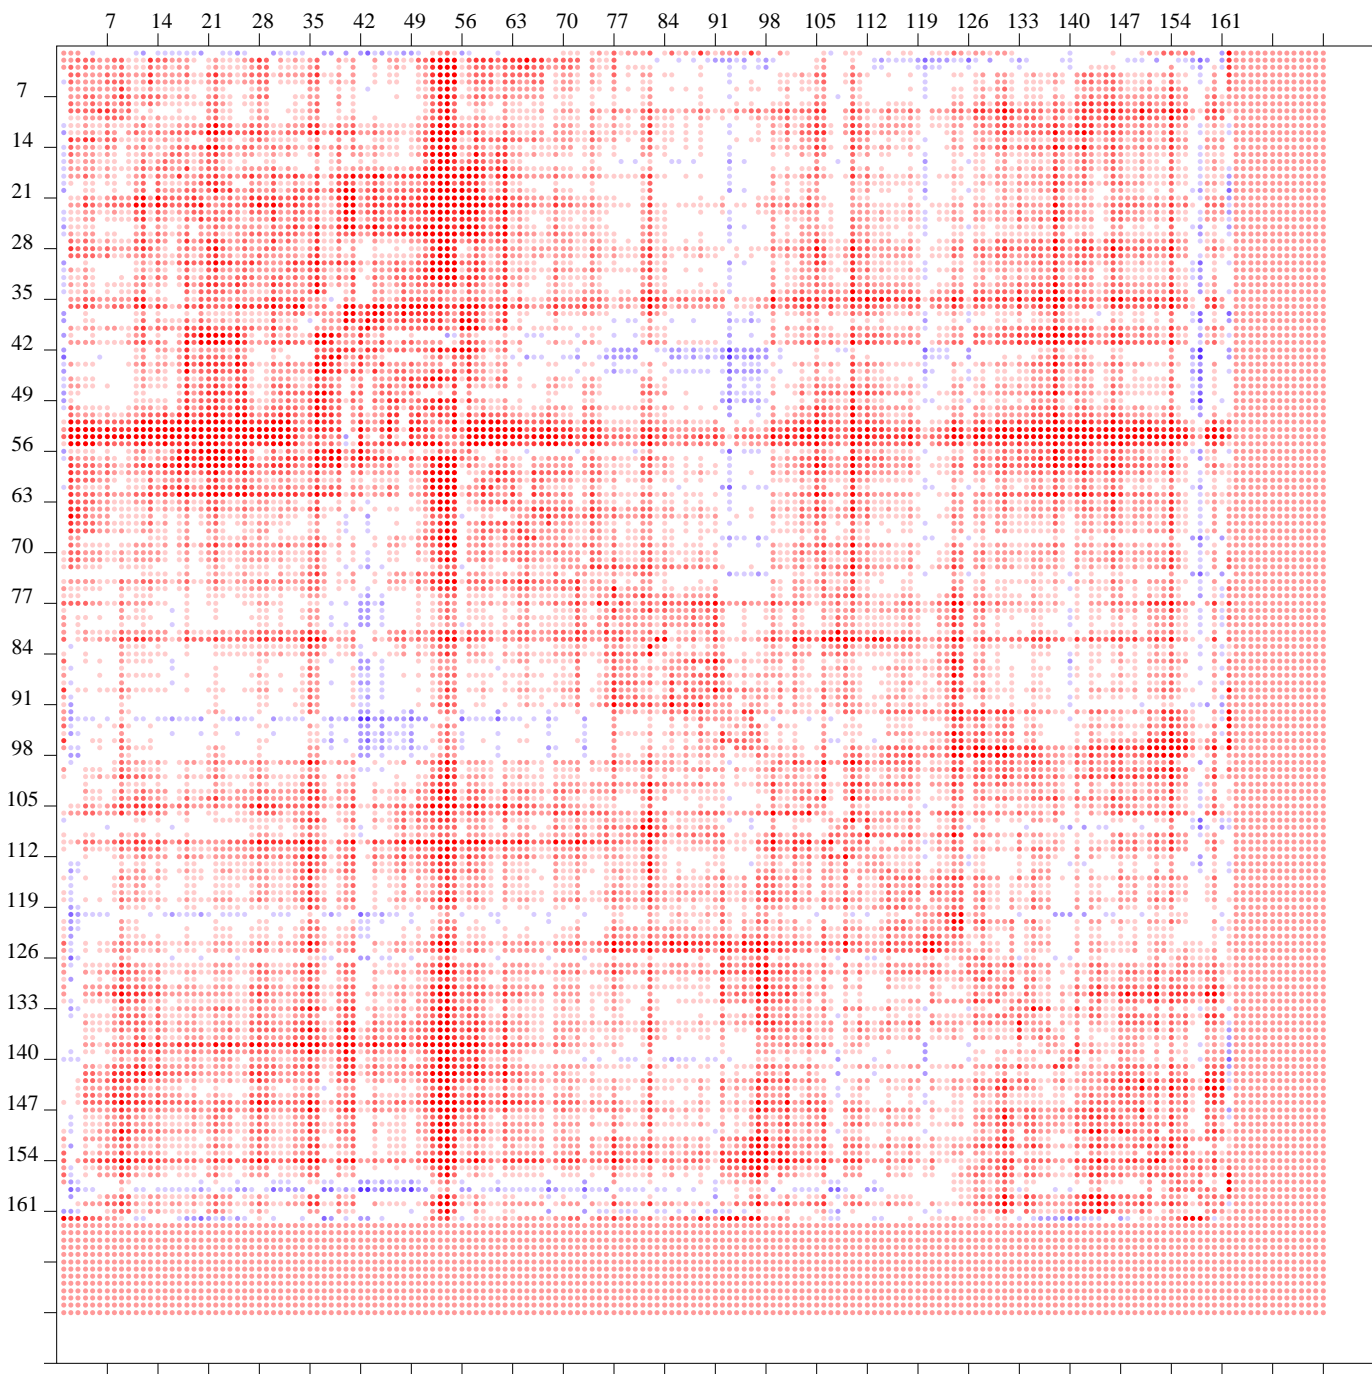

# 3lzm ver 1231

ALPHA CARBON DIFFERENCE DISTANCE

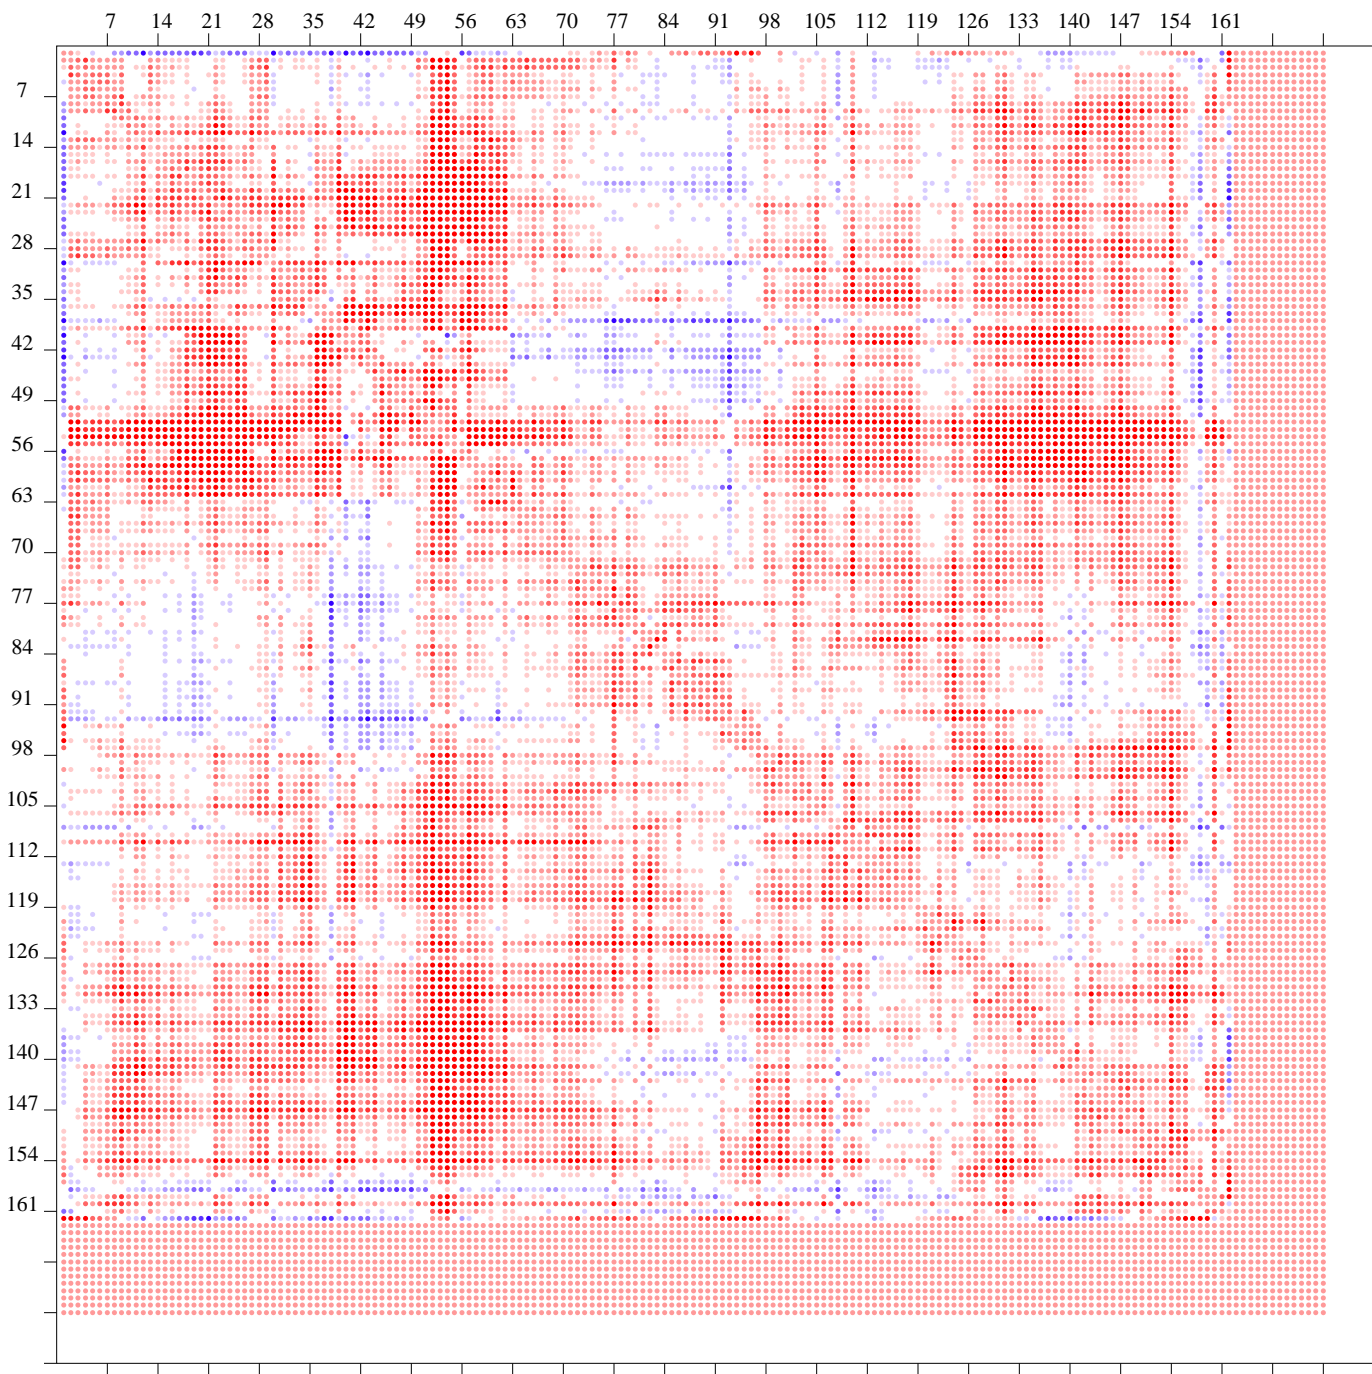



# 3lzm ver 1251

ALPHA CARBON DIFFERENCE DISTANCE

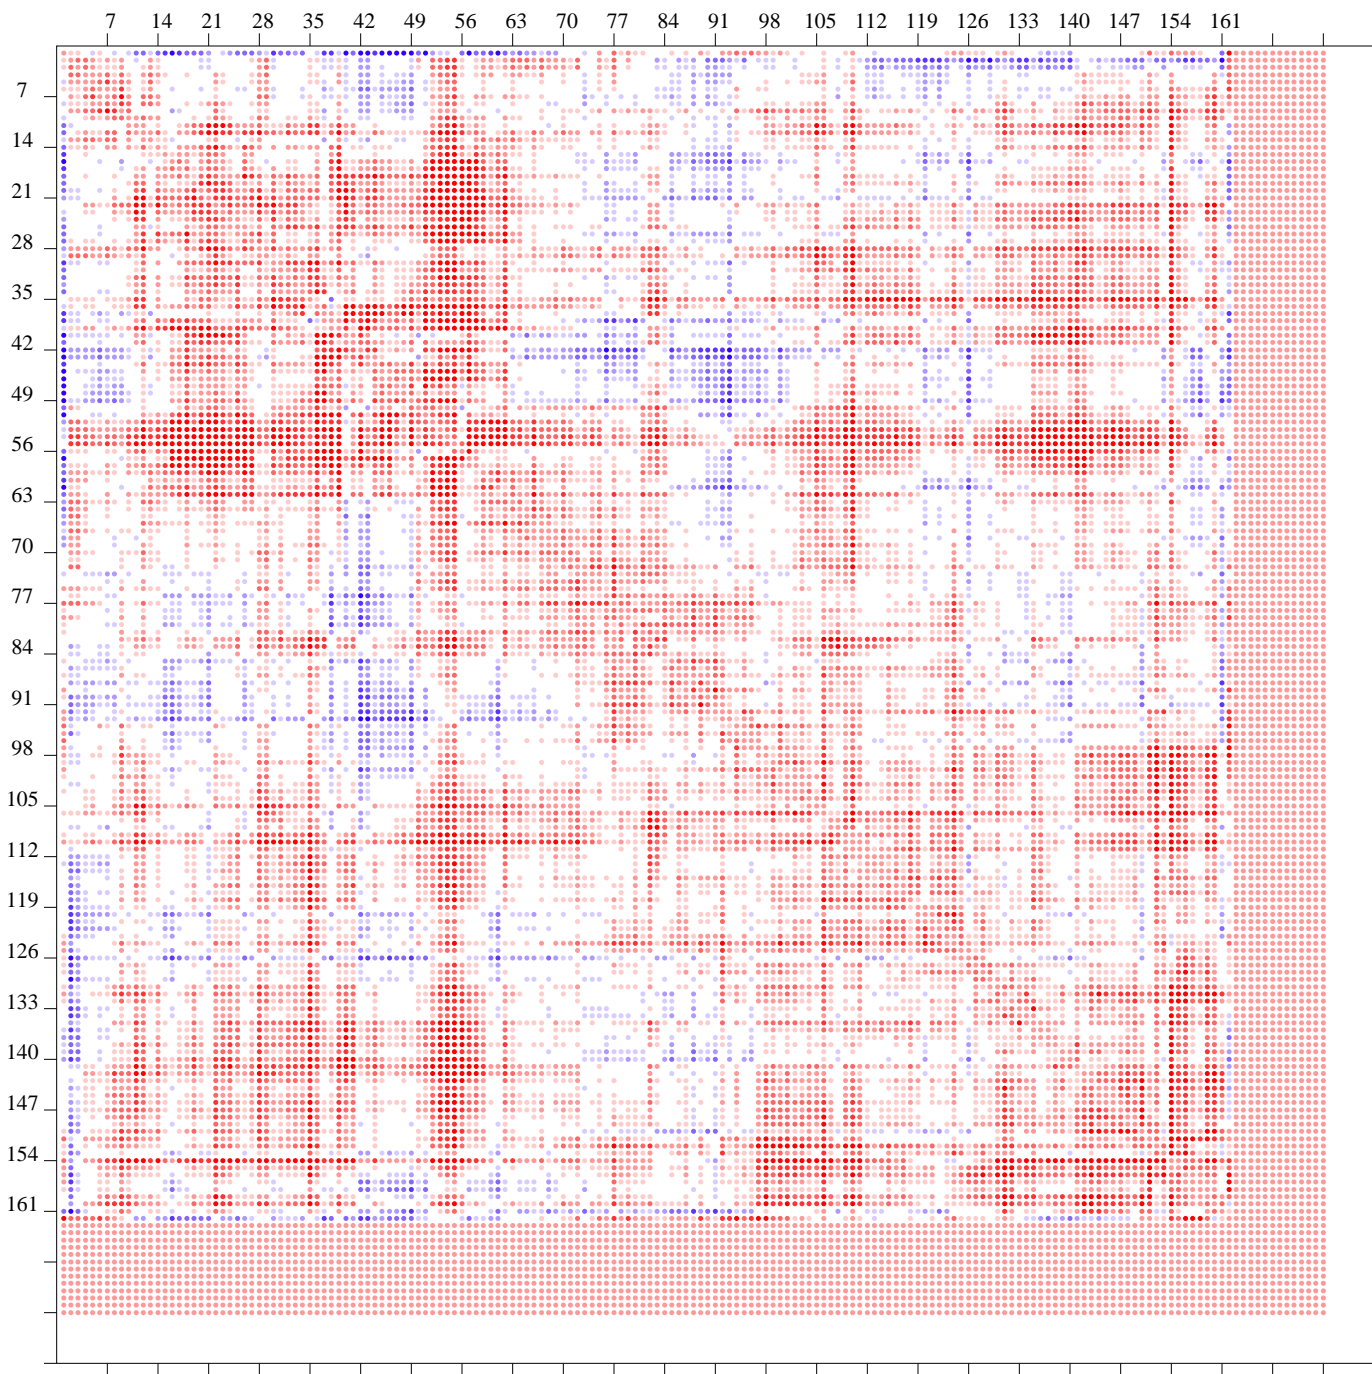

# 3lzm ver 217l

ALPHA CARBON DIFFERENCE DISTANCE

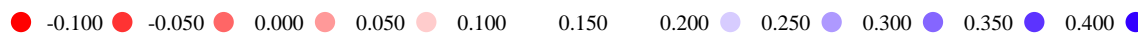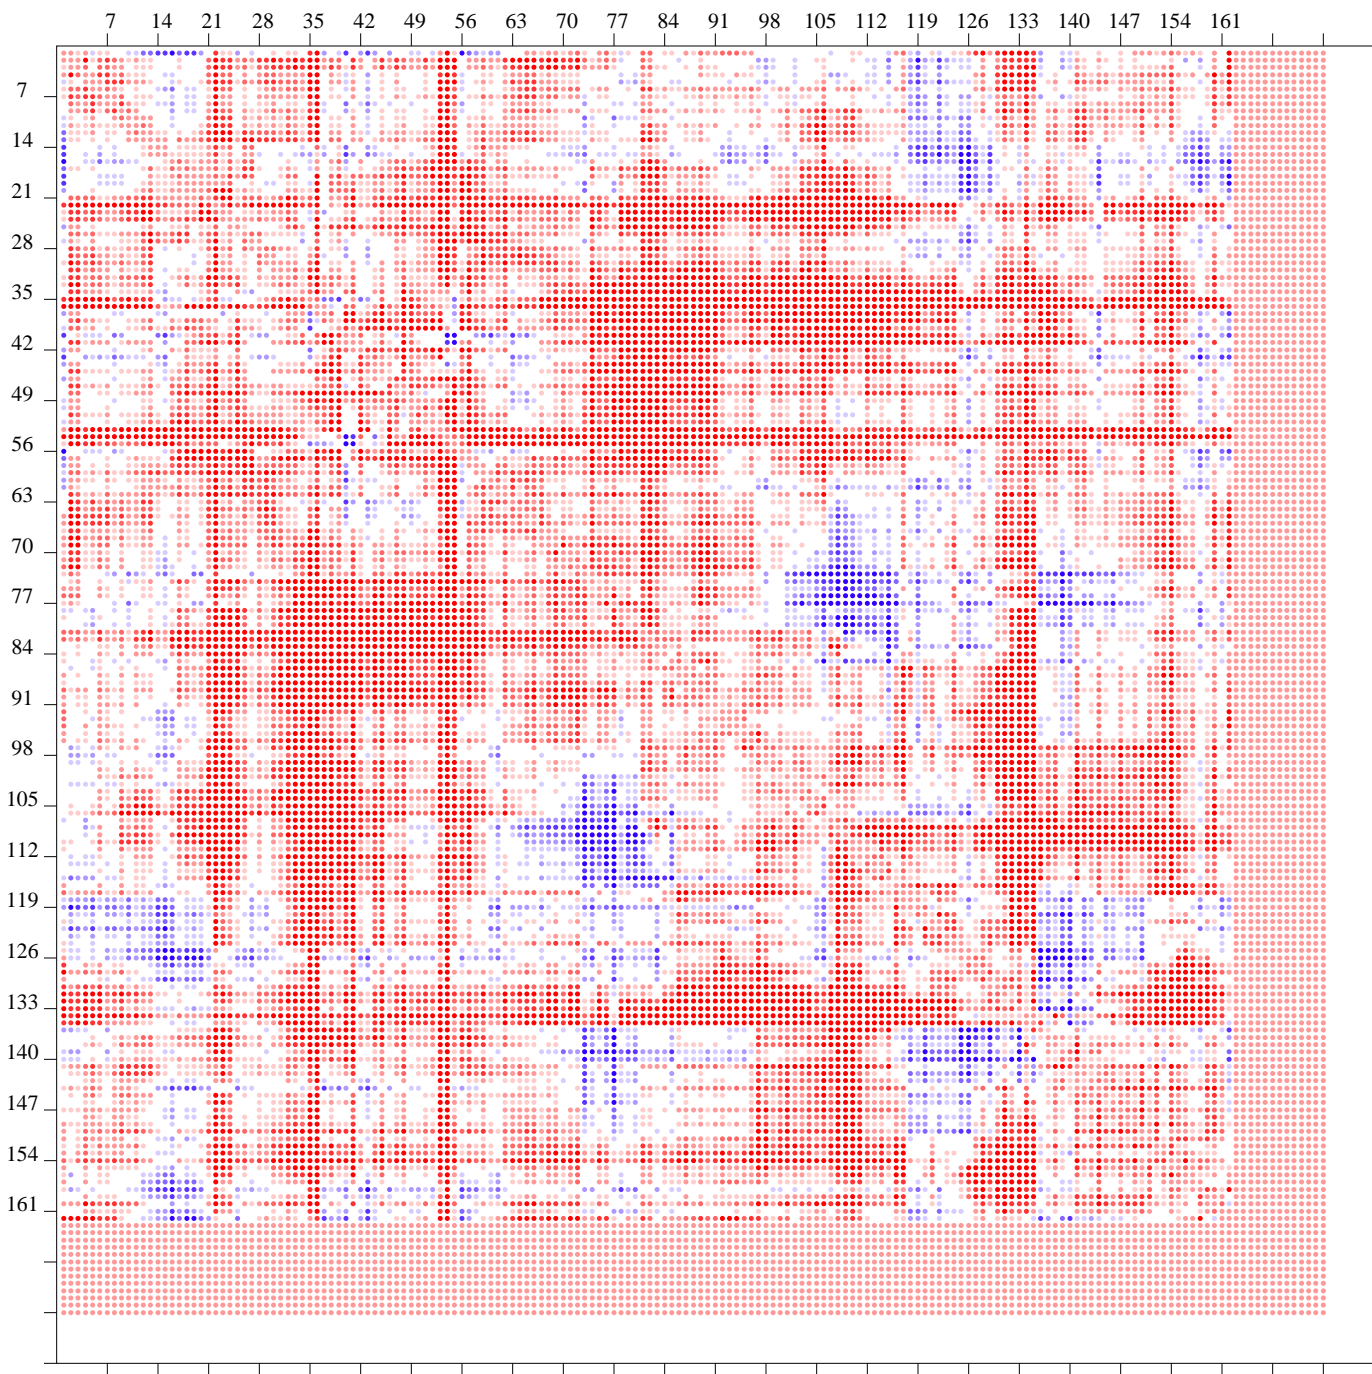

# 3lzm ver 2201

ALPHA CARBON DIFFERENCE DISTANCE

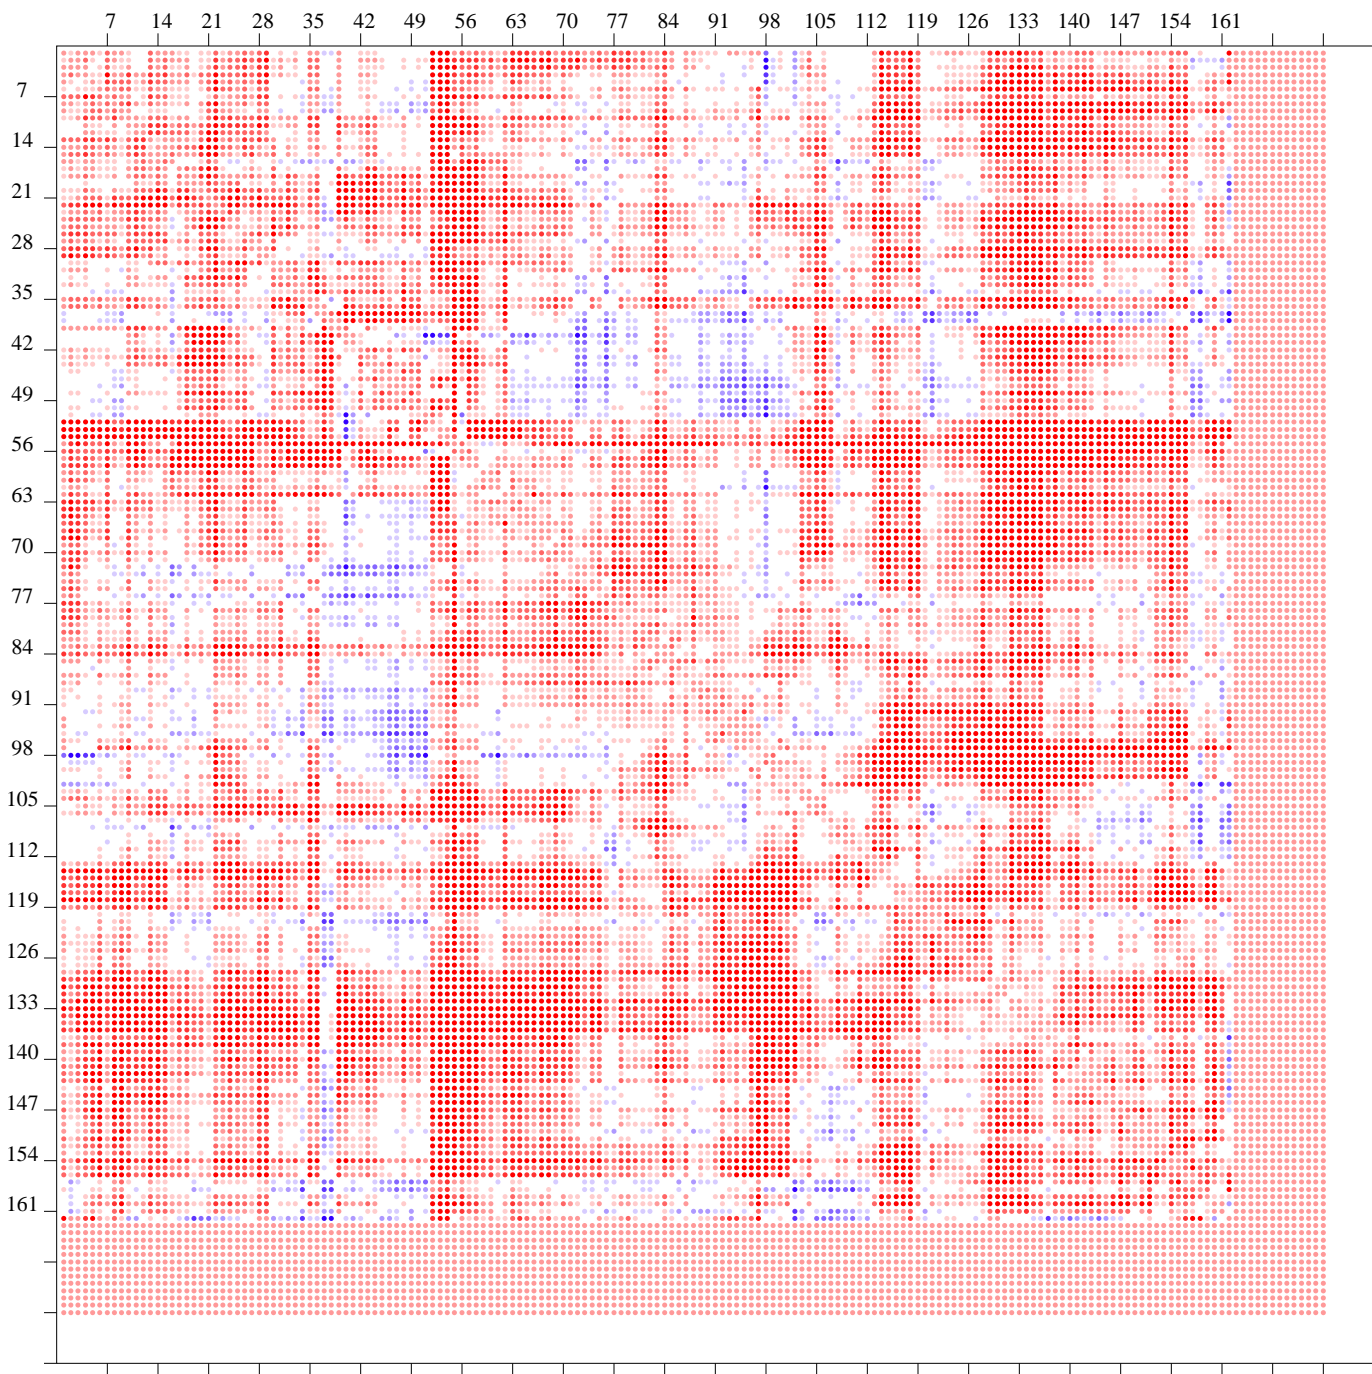

# 3lzm ver 2231

ALPHA CARBON DIFFERENCE DISTANCE

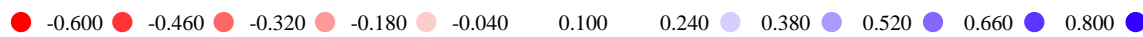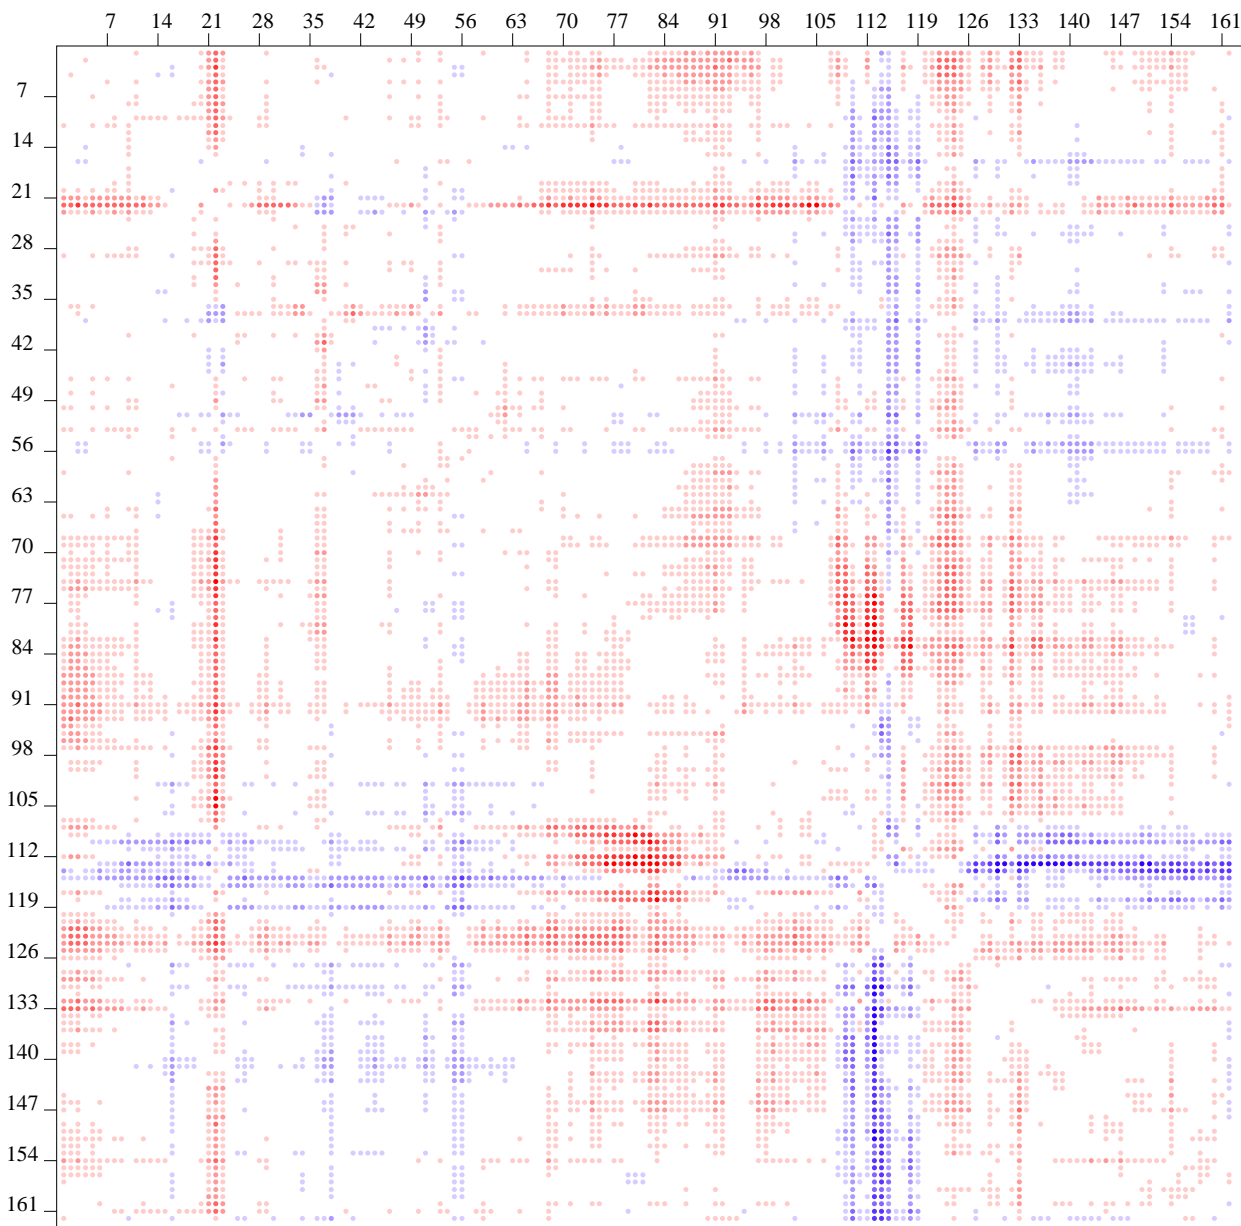

Supplement: pnas_98_6_3139__9.pdf [file pnas_98_6_3139__9.pdf]
