# Supplementary material
Source: PubMed Central journal article supplement (PMC30620)

# 105m ver 1mlm

ALPHA CARBON DIFFERENCE DISTANCE

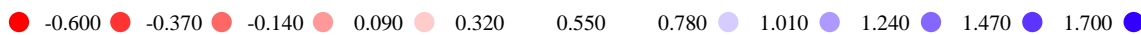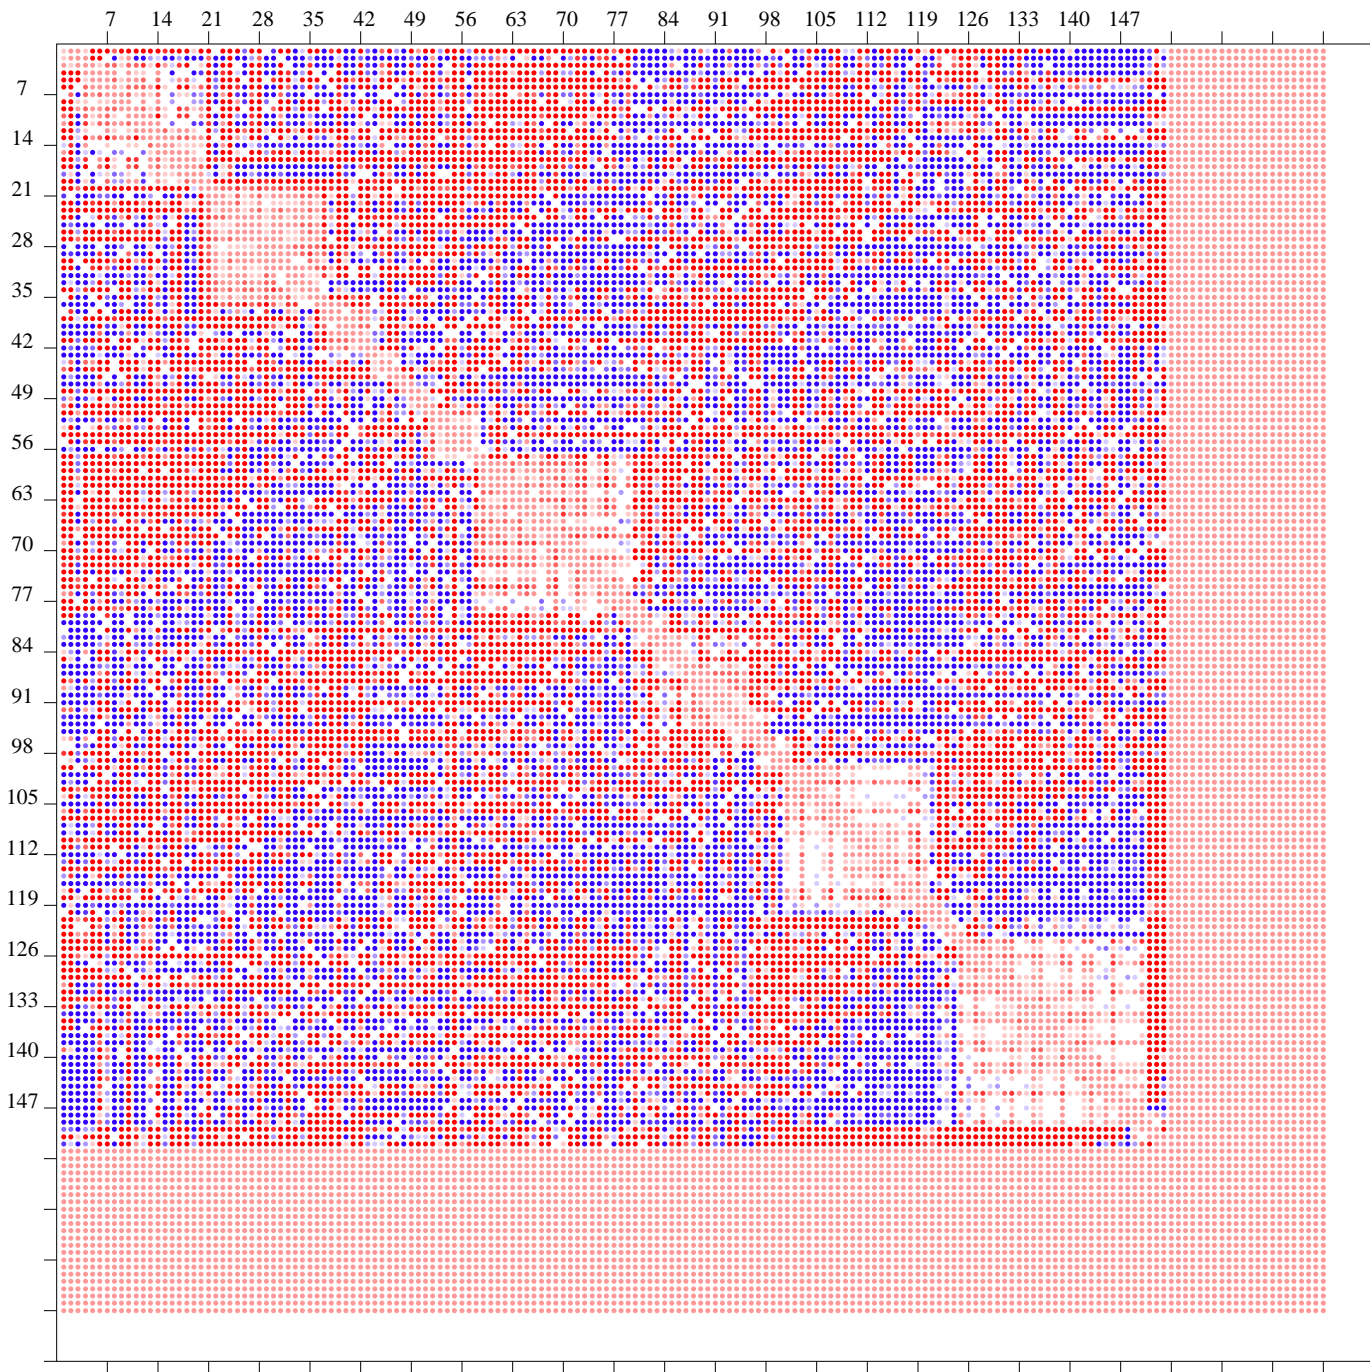

# 105m ver 102m

ALPHA CARBON DIFFERENCE DISTANCE

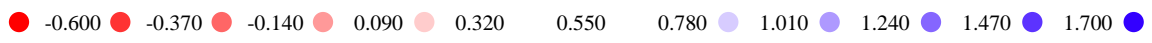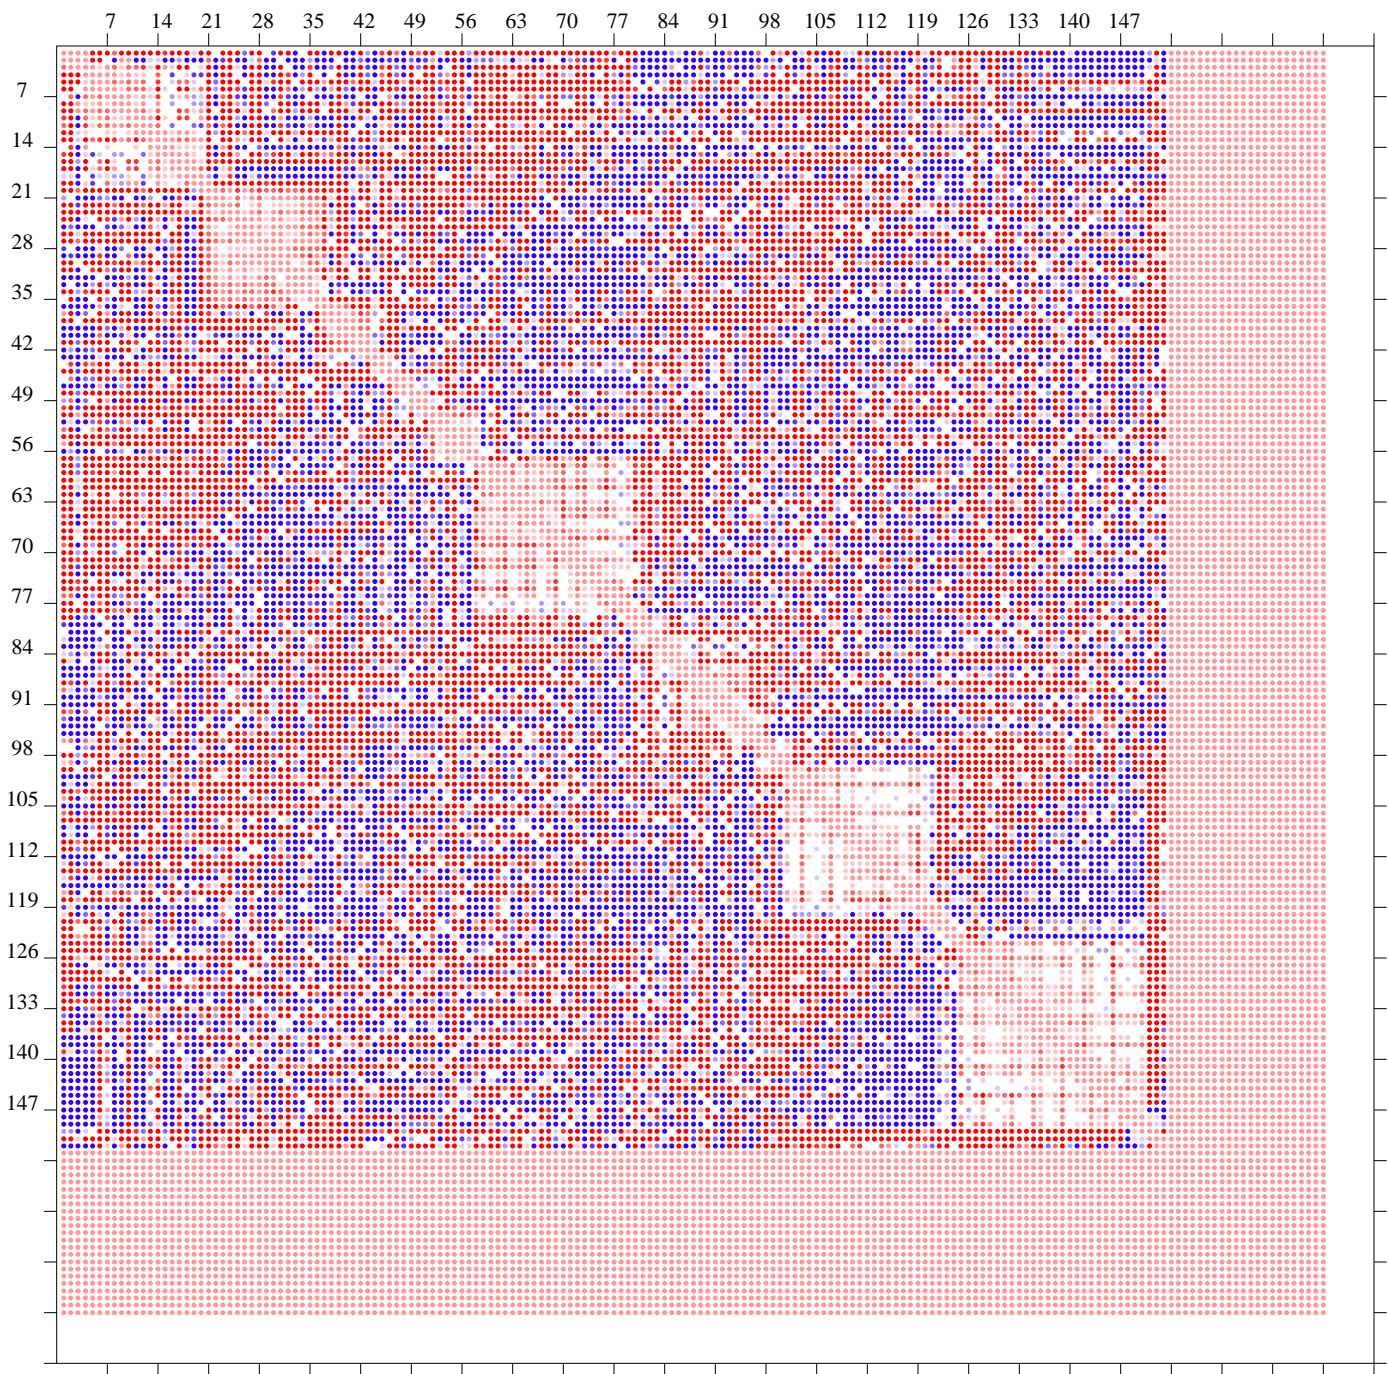

# 105m ver 106m

ALPHA CARBON DIFFERENCE DISTANCE

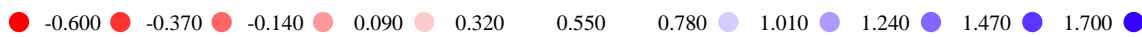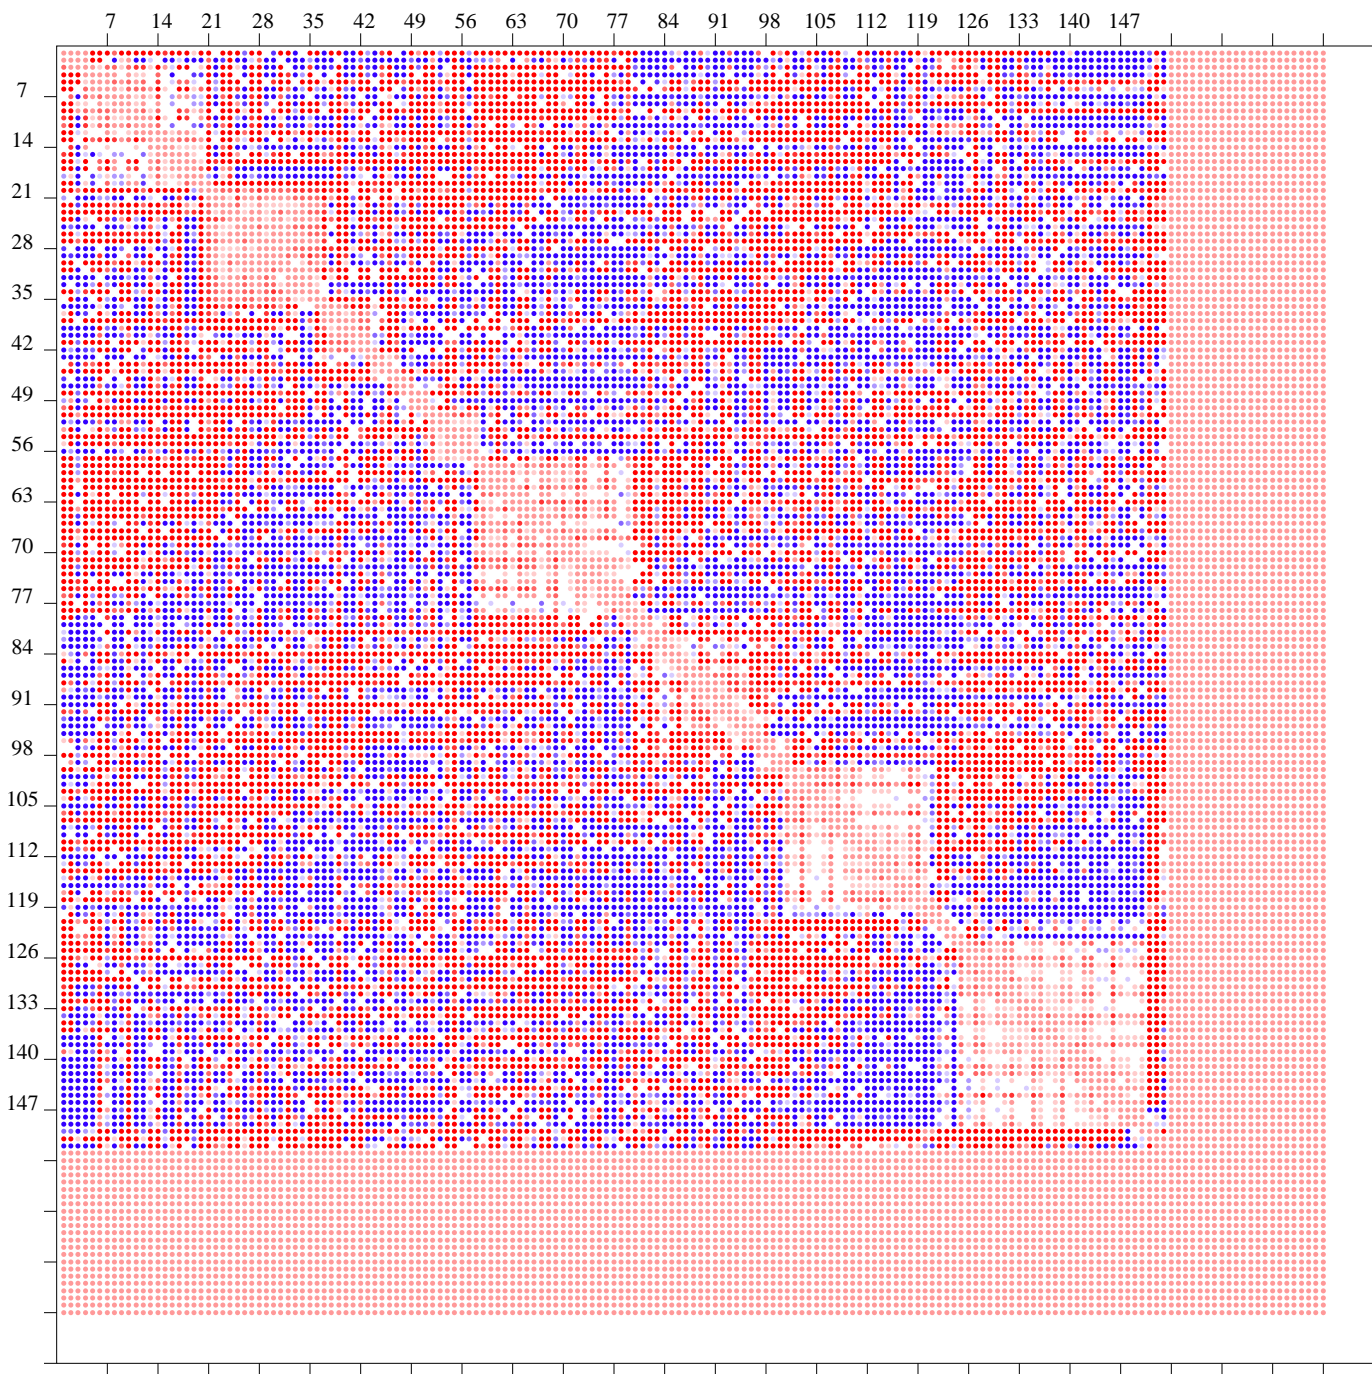

# 105m ver 109m

ALPHA CARBON DIFFERENCE DISTANCE

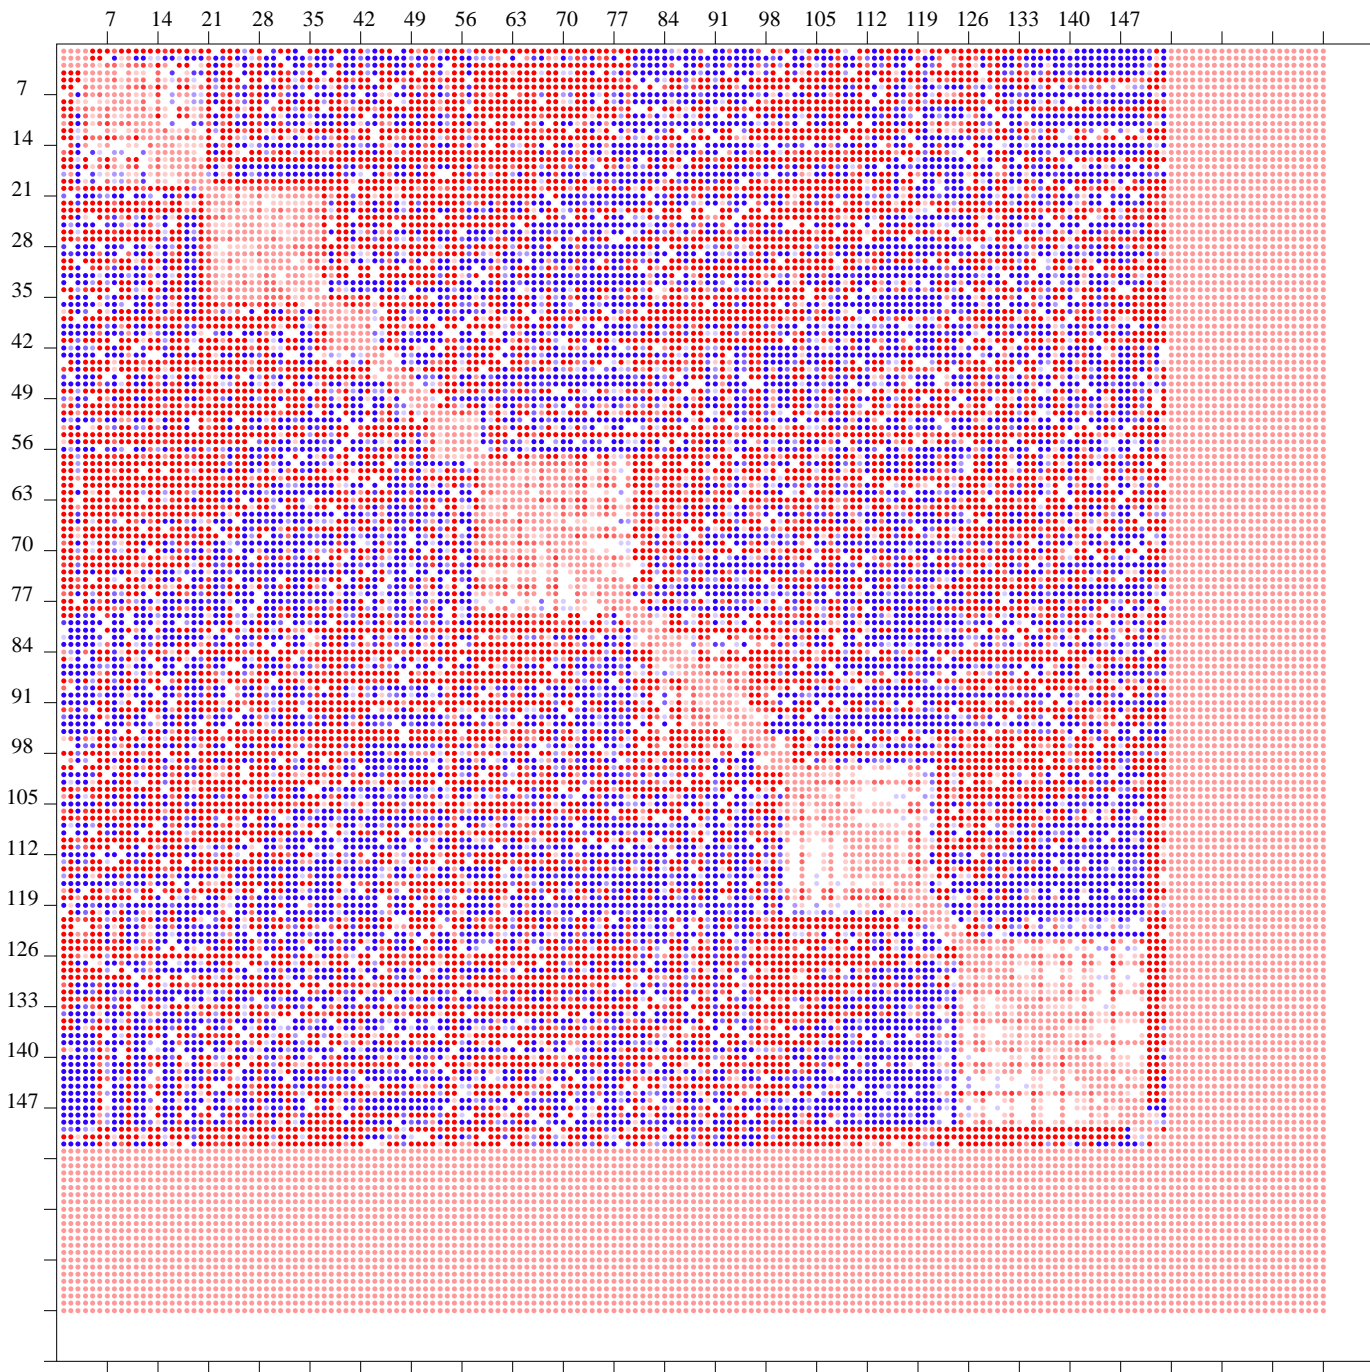

# 105m ver 101m

ALPHA CARBON DIFFERENCE DISTANCE

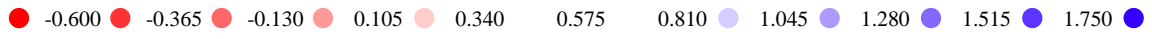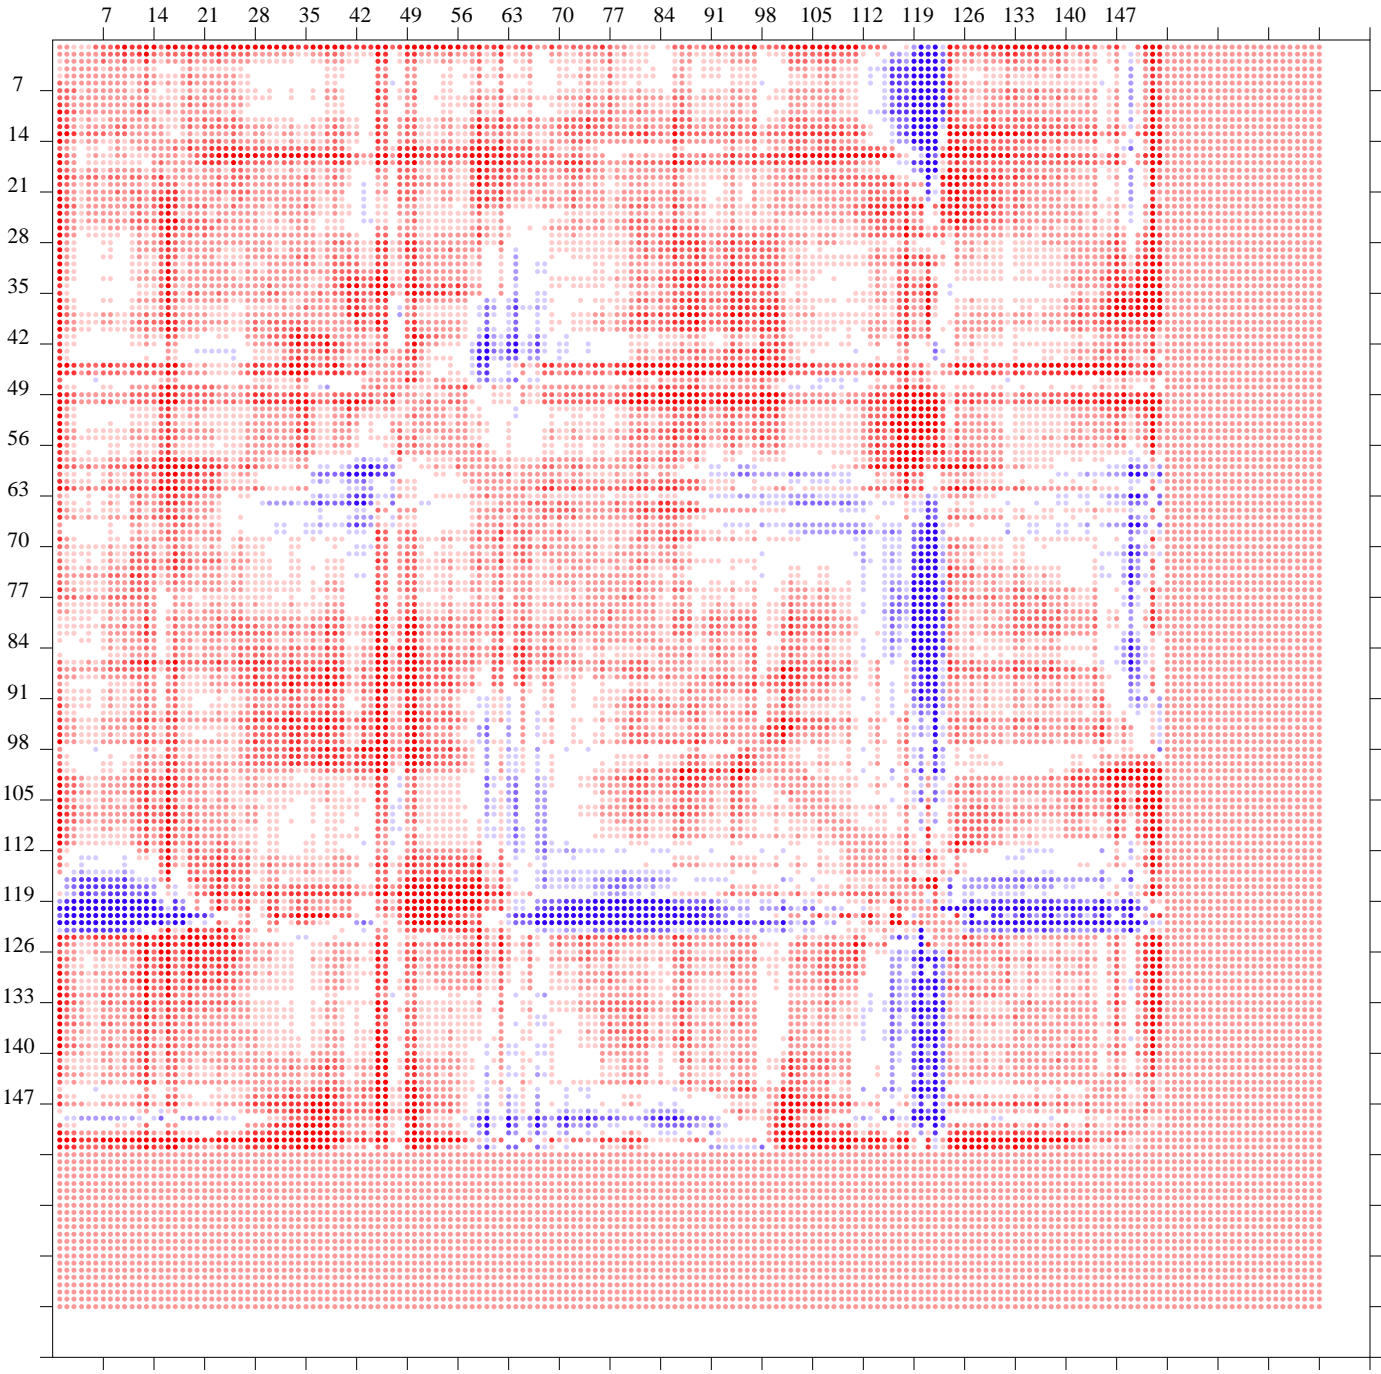

# 105m ver 1ch1

ALPHA CARBON DIFFERENCE DISTANCE

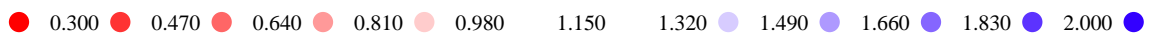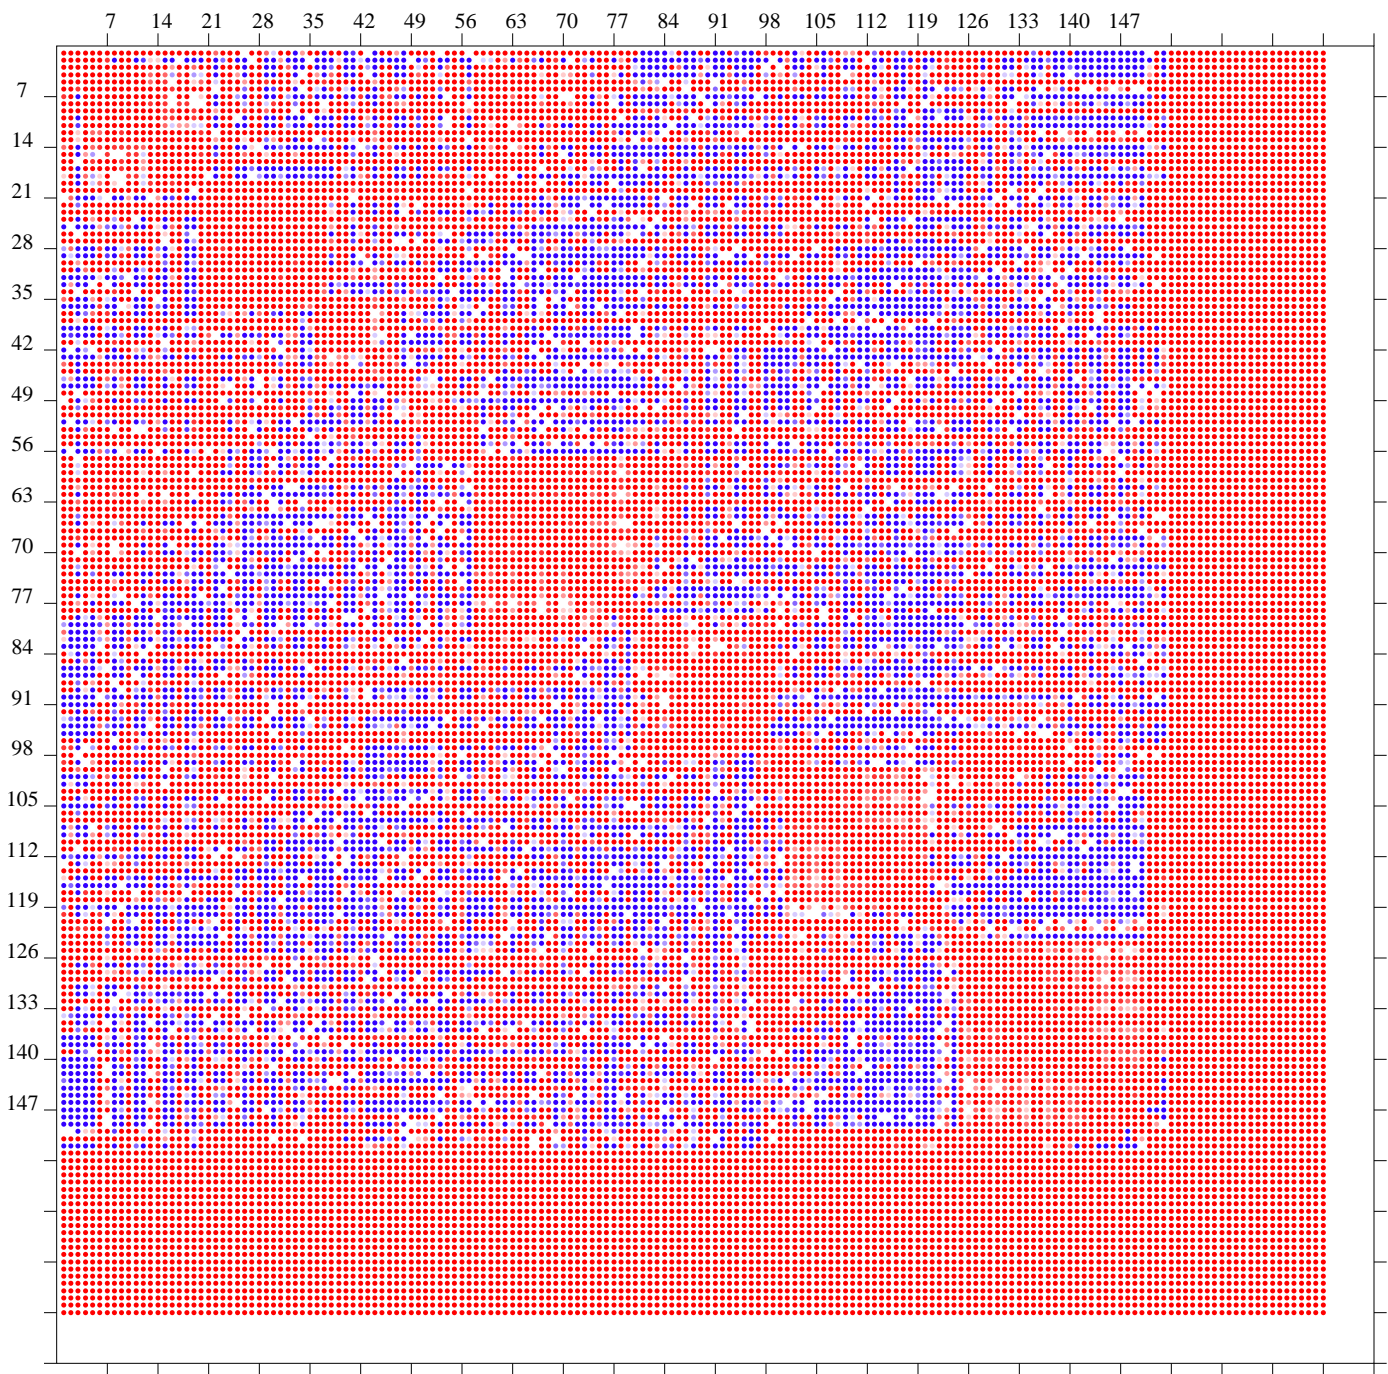

# 105m ver 1ch5

ALPHA CARBON DIFFERENCE DISTANCE

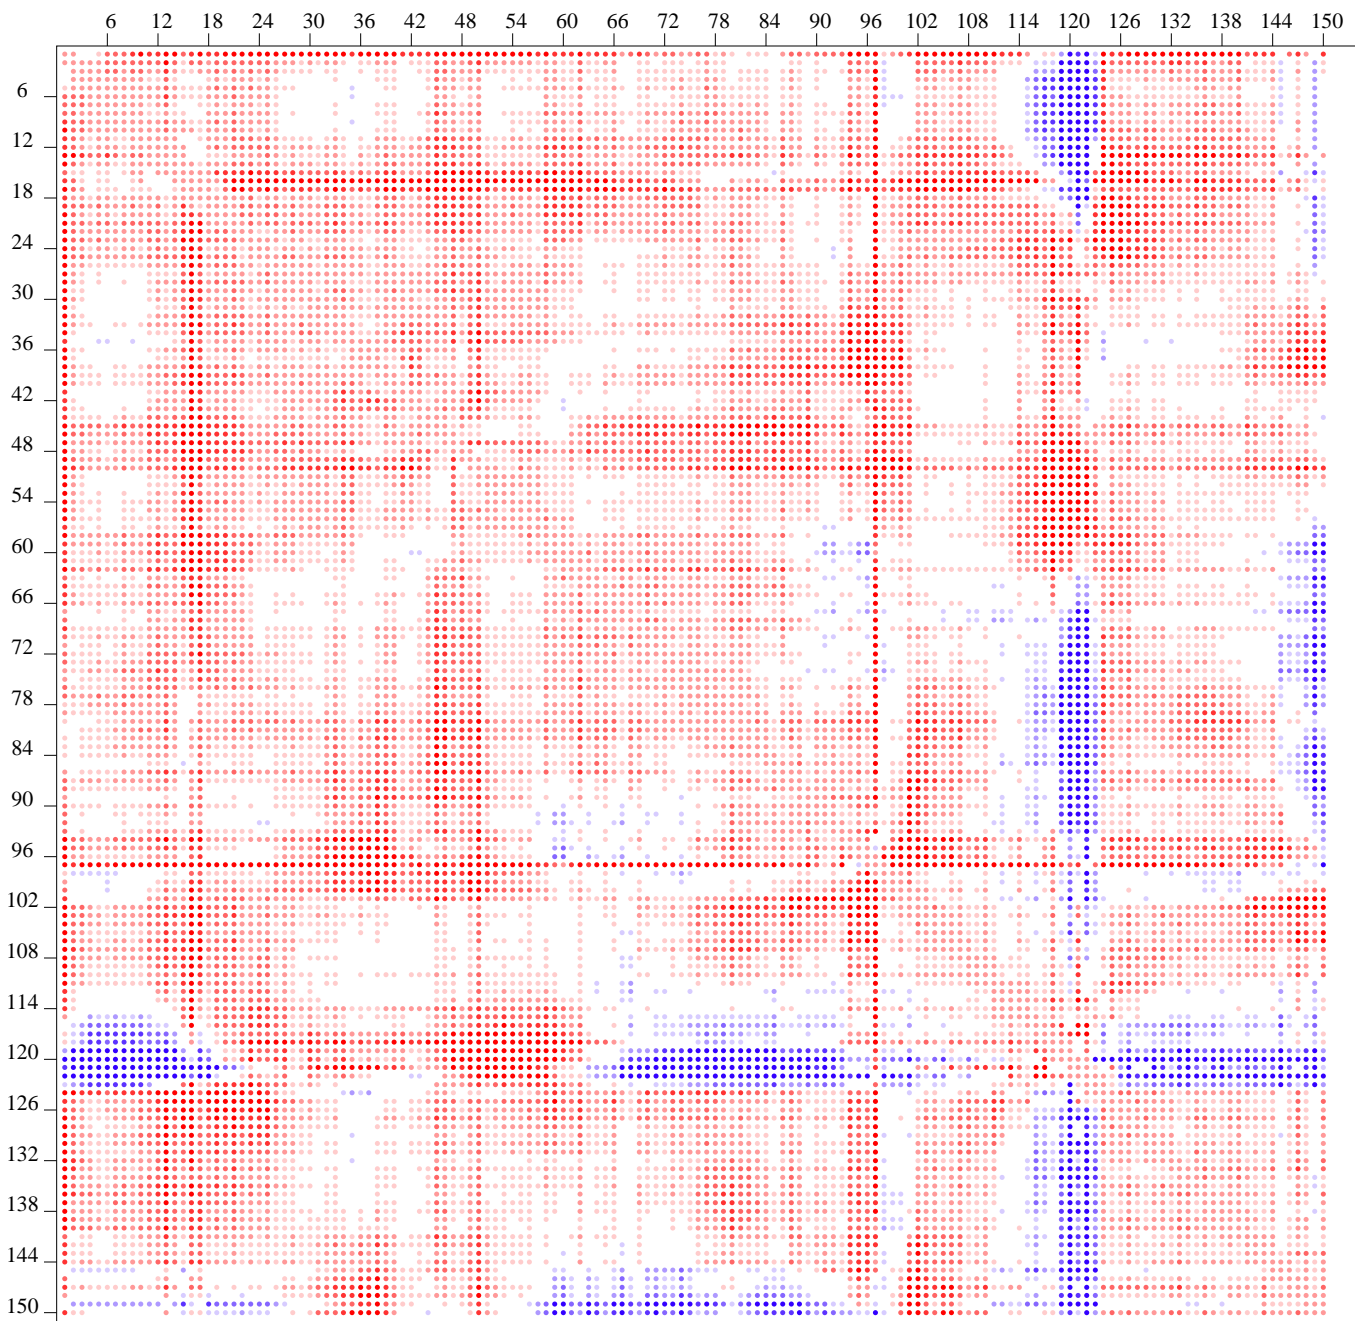

# 105m ver 1ch9

ALPHA CARBON DIFFERENCE DISTANCE

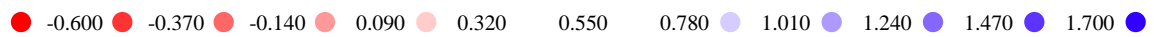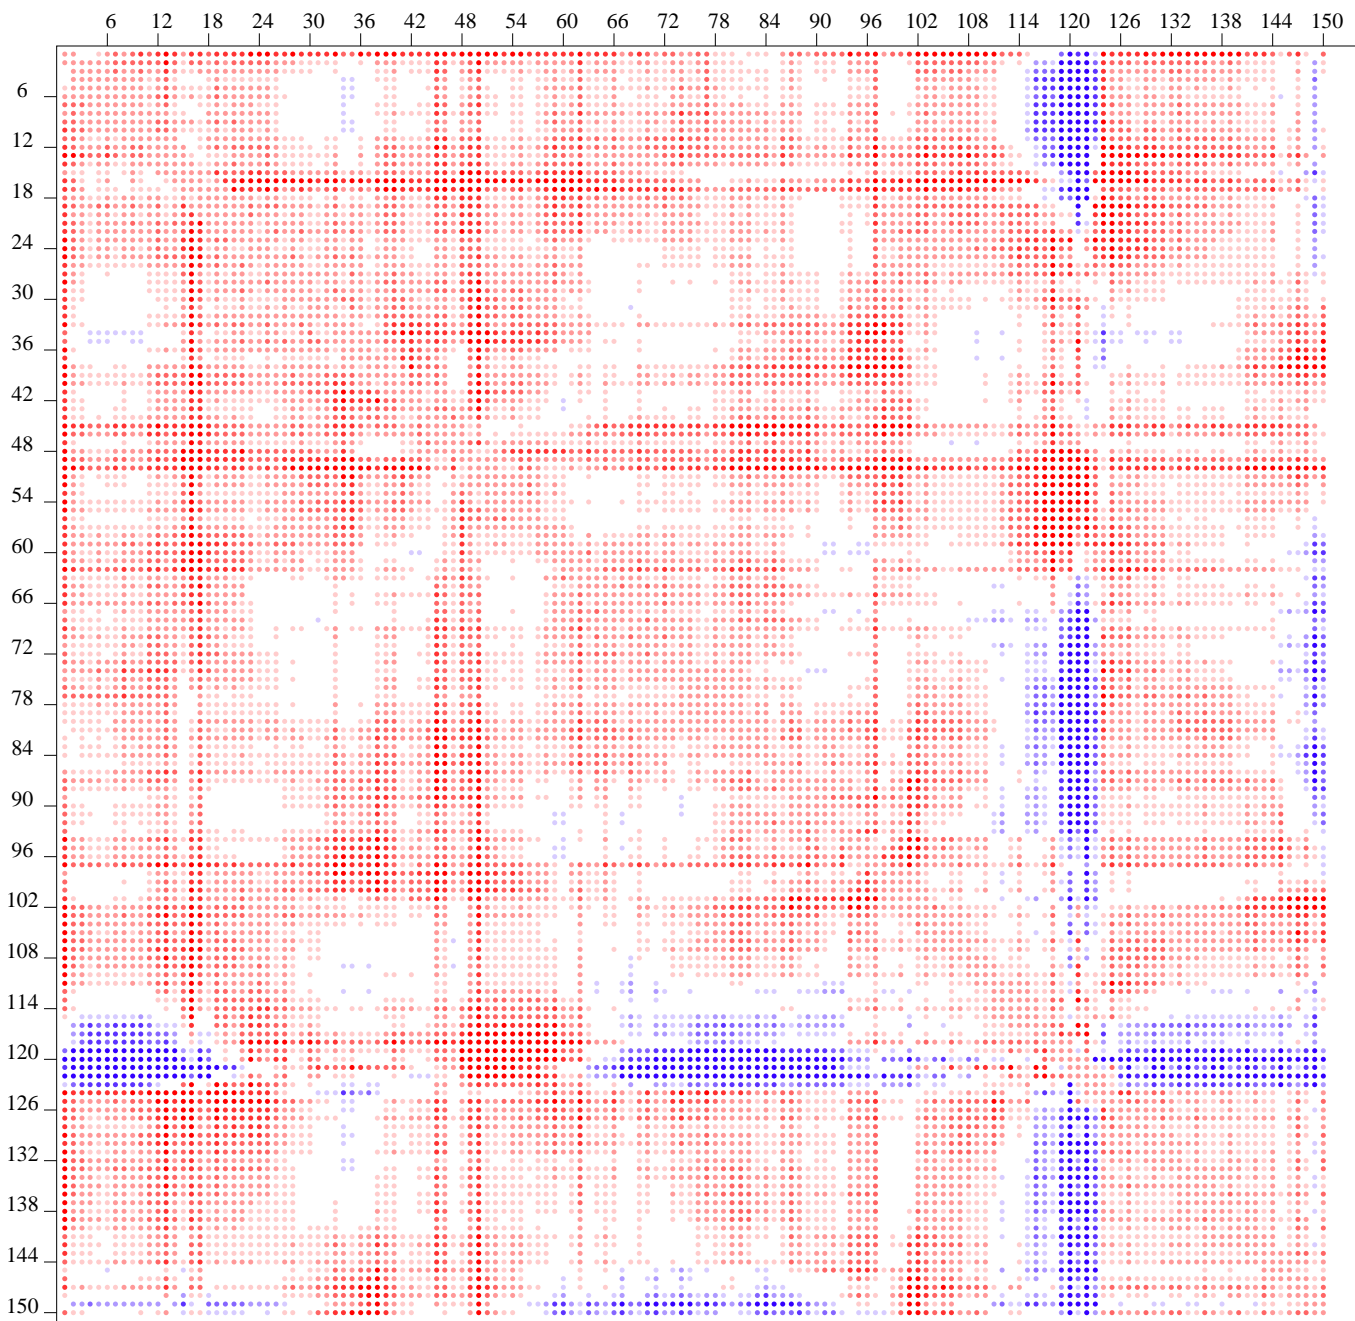



# 105m ver 1ch2

ALPHA CARBON DIFFERENCE DISTANCE

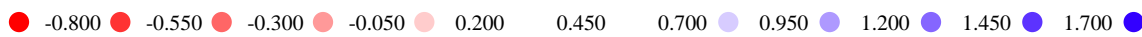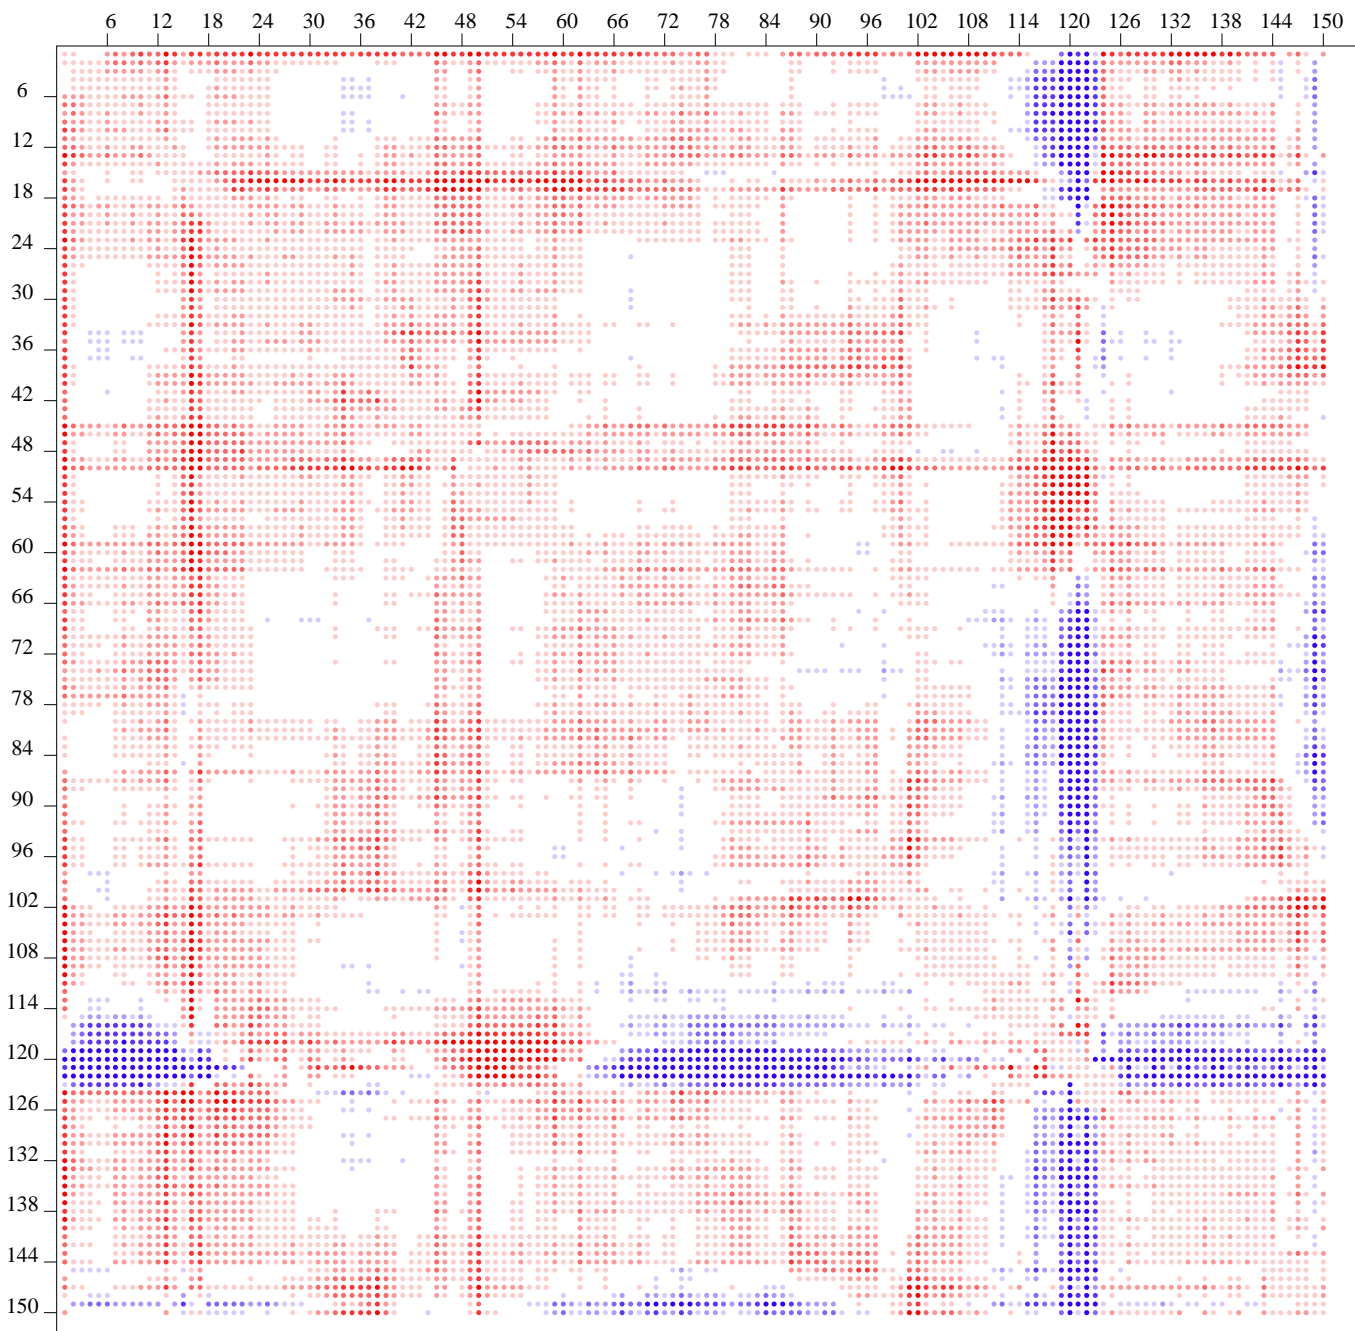

# 105m ver 1ch3

ALPHA CARBON DIFFERENCE DISTANCE

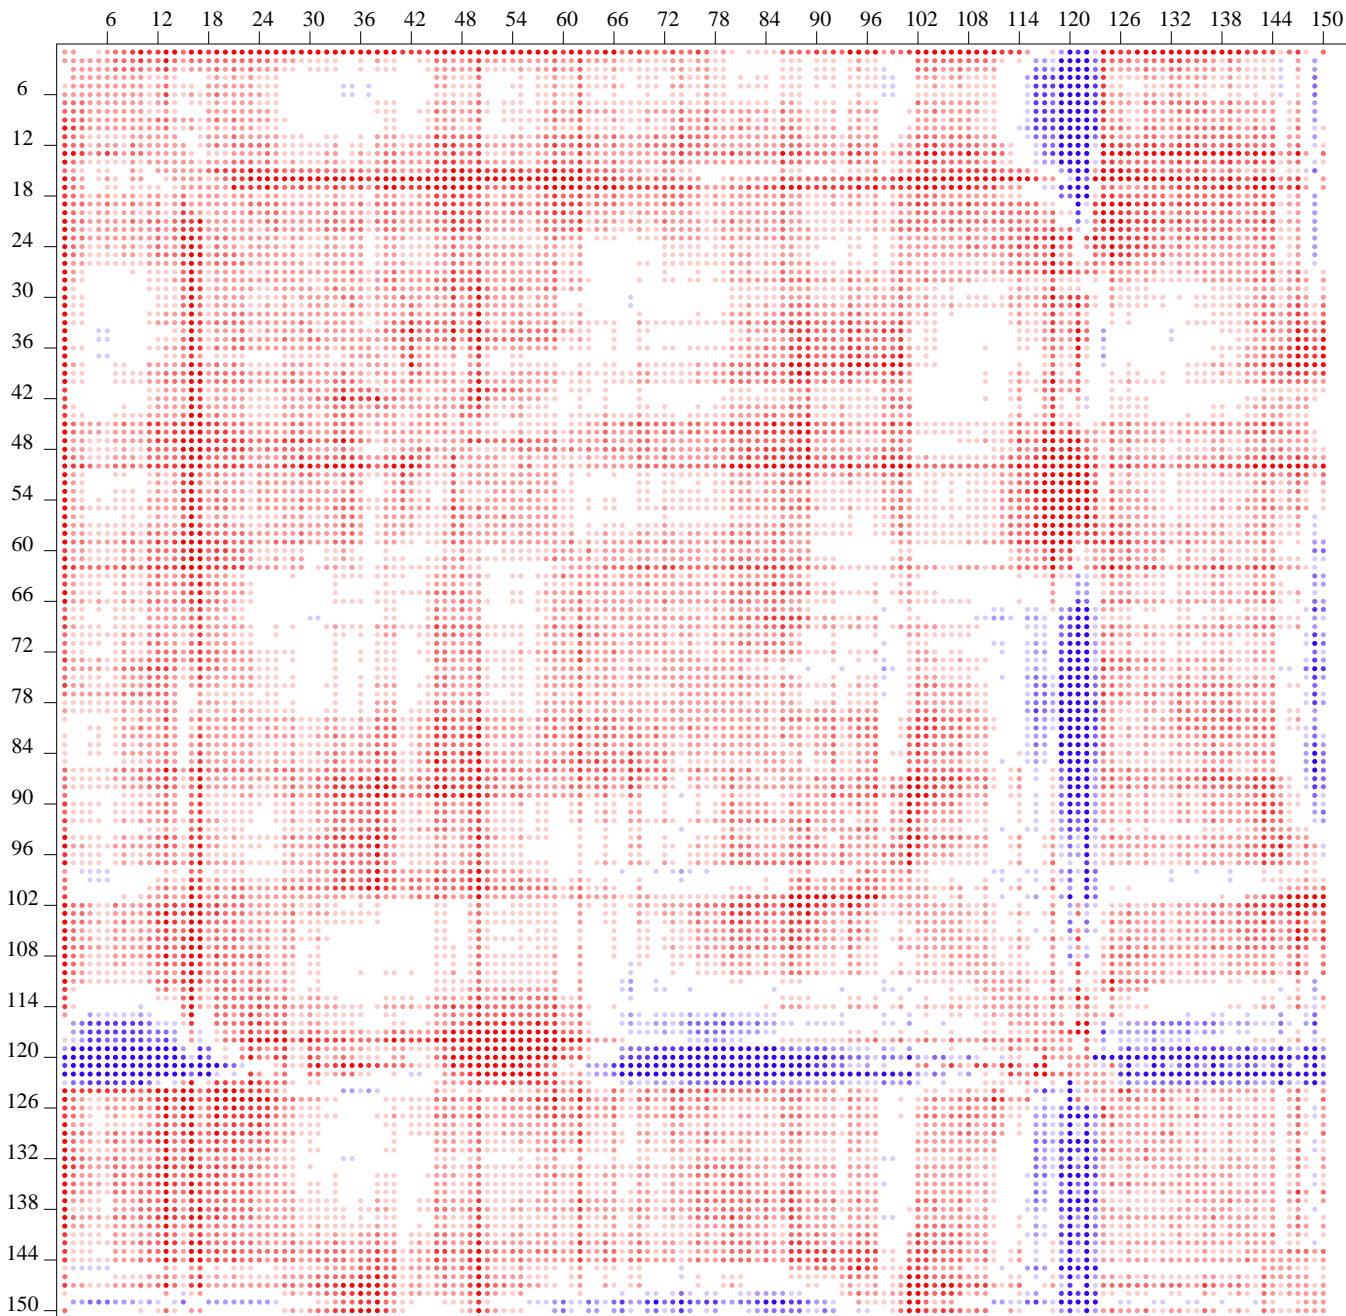

# 105m ver 1ch7

ALPHA CARBON DIFFERENCE DISTANCE

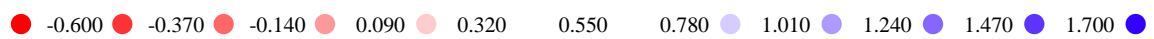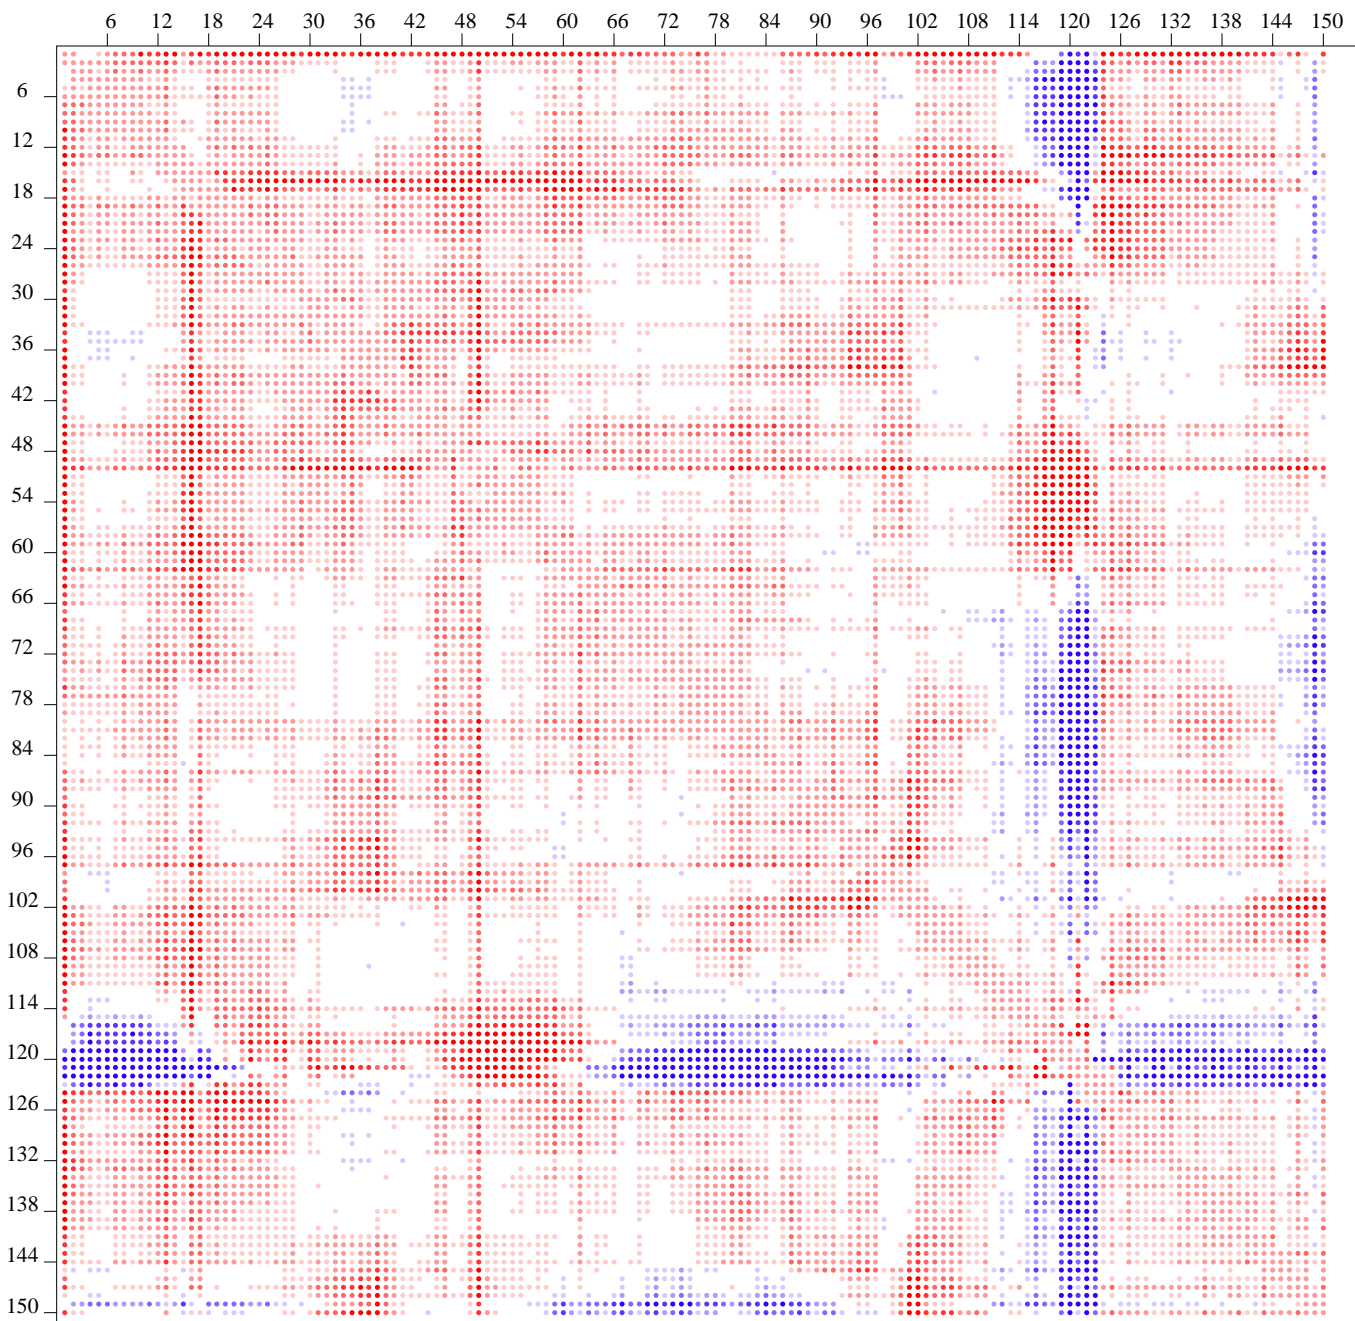

Supplement: pnas_98_6_3139__10.pdf [file pnas_98_6_3139__10.pdf]
