# Supplementary material
Source: PubMed Central journal article supplement (PMC30620)

# 1bmz ver 1ttr

ALPHA CARBON DIFFERENCE DISTANCE

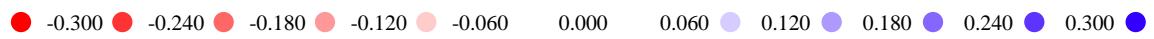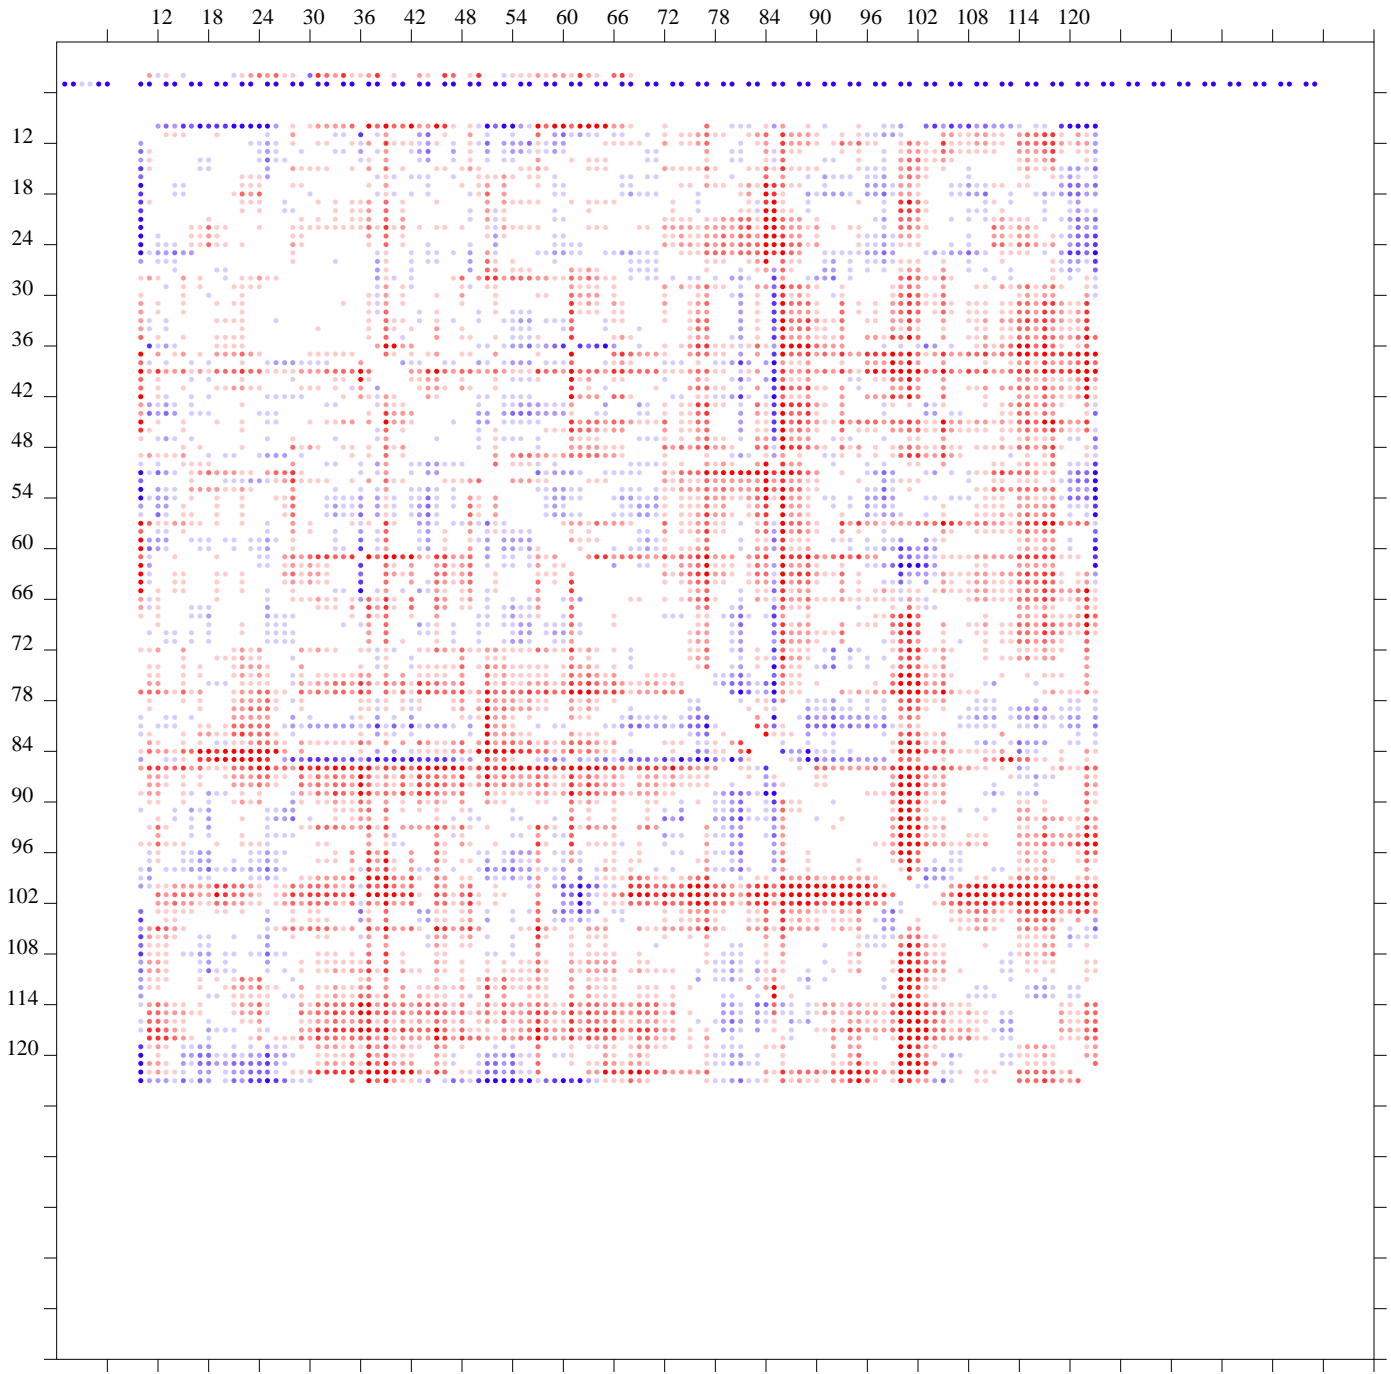

# 1bmz ver 1ttc

ALPHA CARBON DIFFERENCE DISTANCE

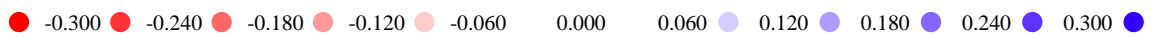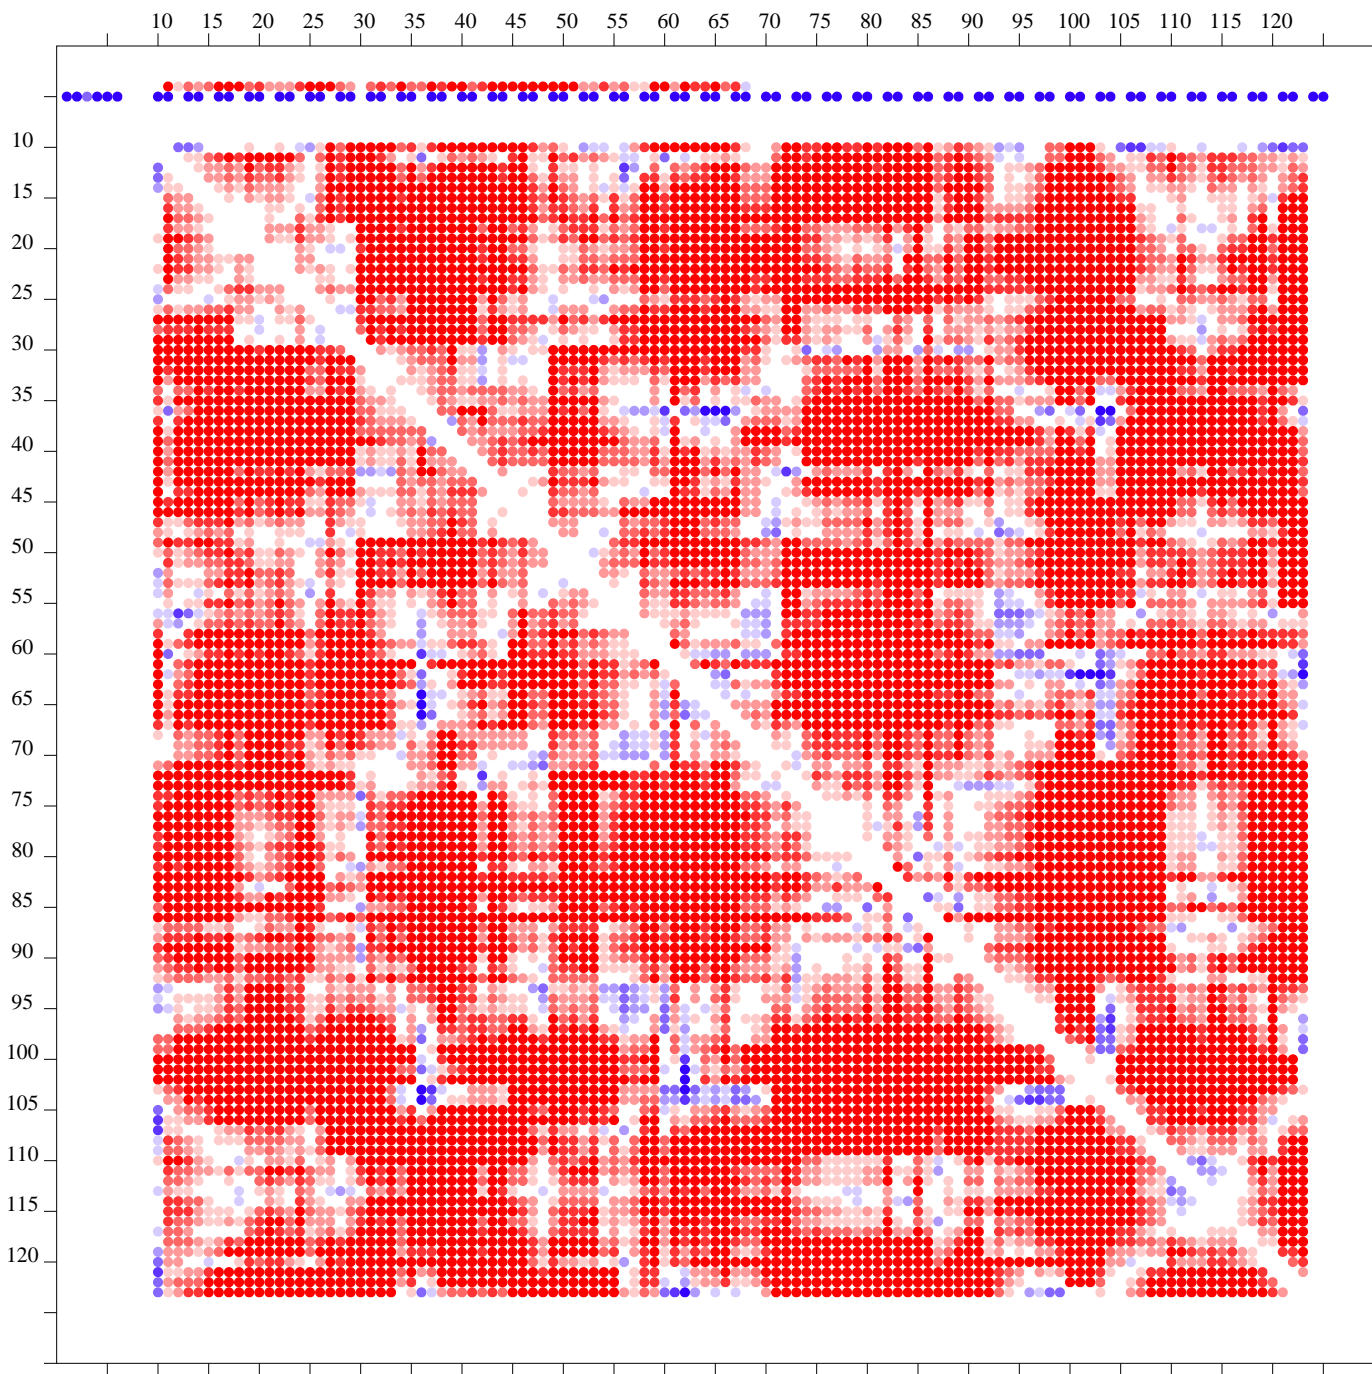

# 1bmz ver 1bz8

ALPHA CARBON DIFFERENCE DISTANCE

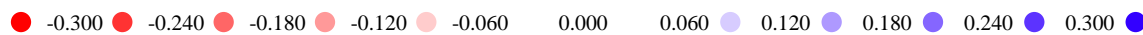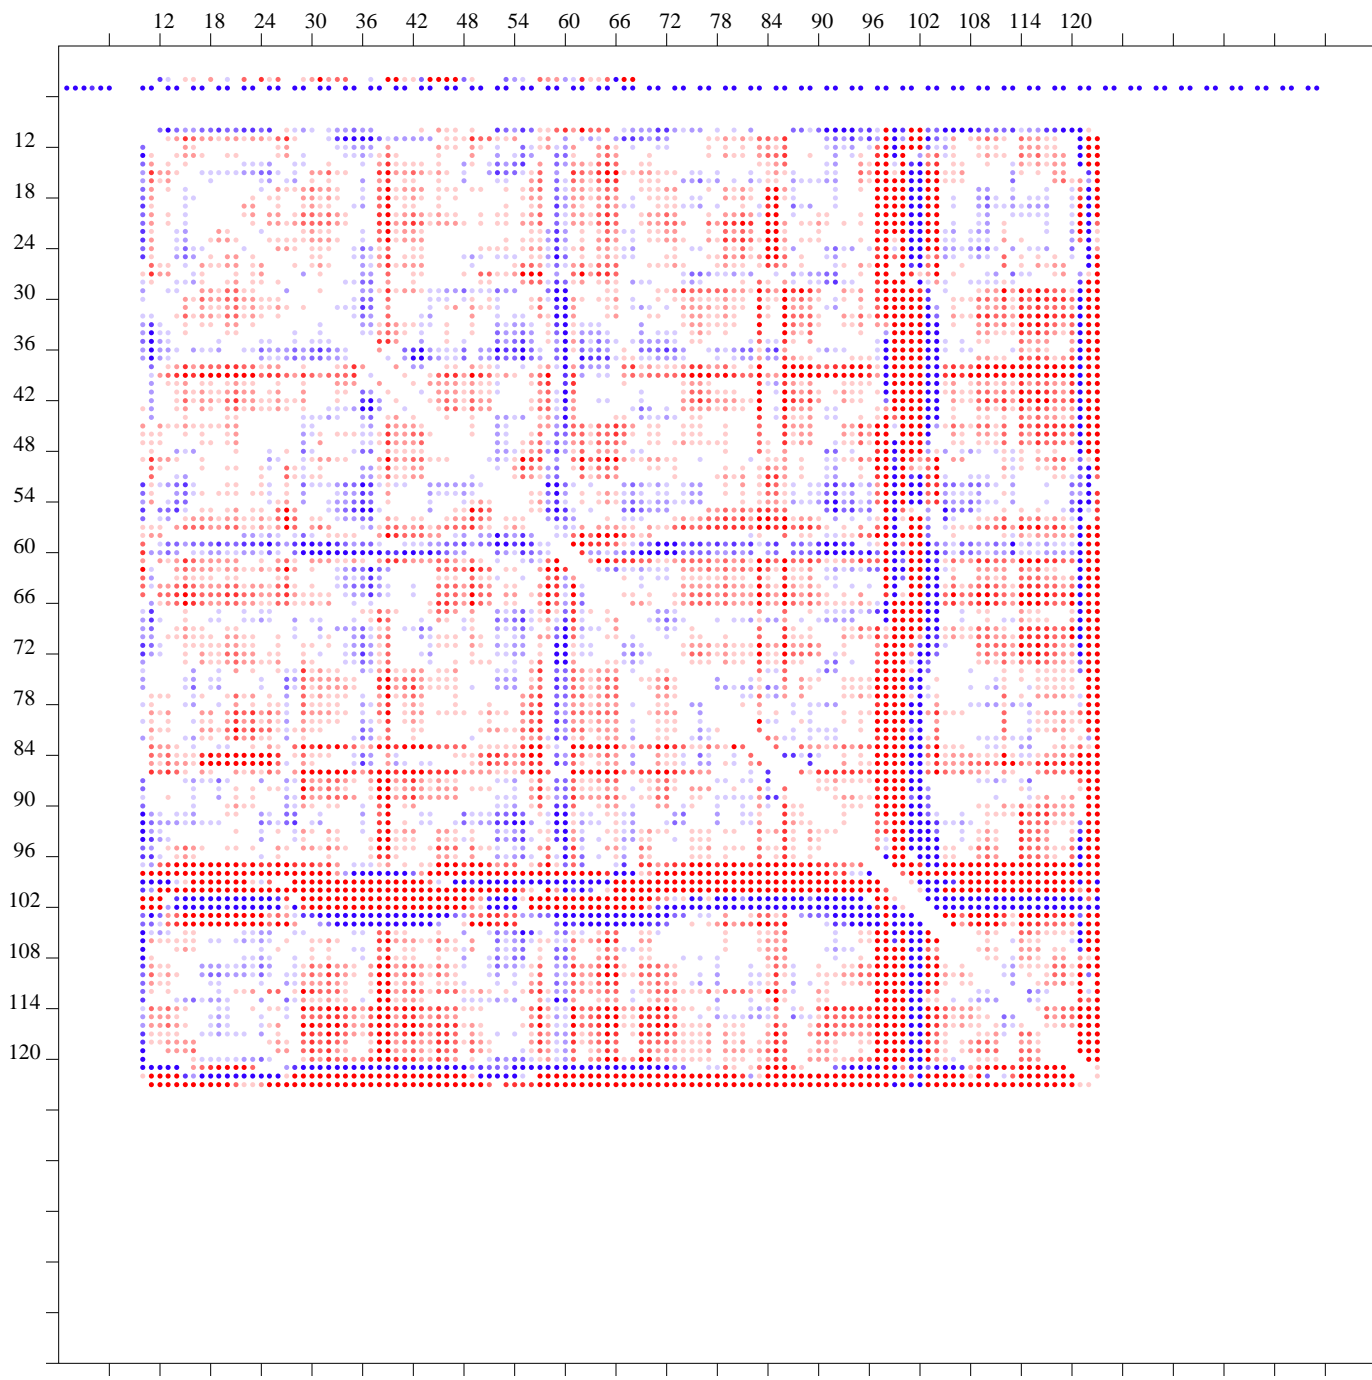

# 1bmz ver 1bzd

ALPHA CARBON DIFFERENCE DISTANCE

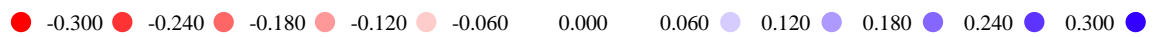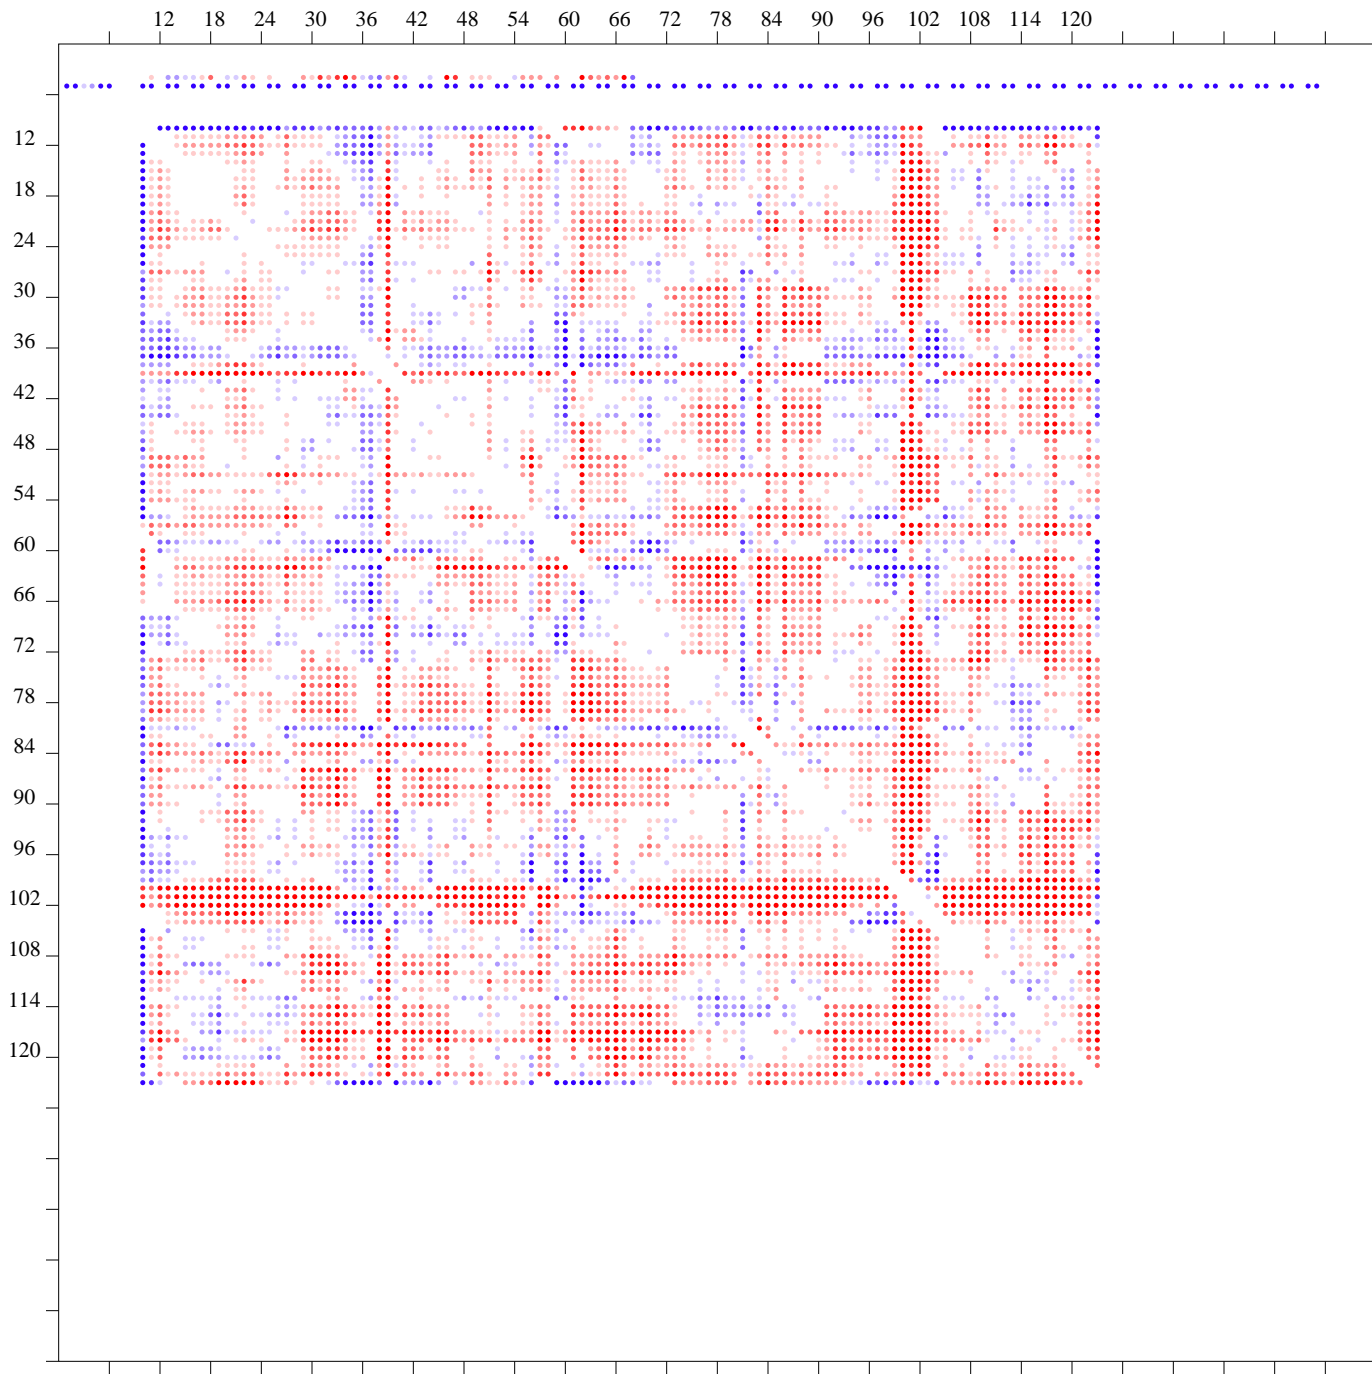

# 1bmz ver 1bze

ALPHA CARBON DIFFERENCE DISTANCE

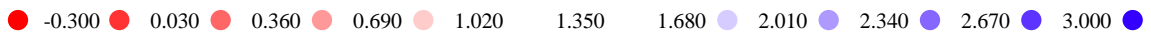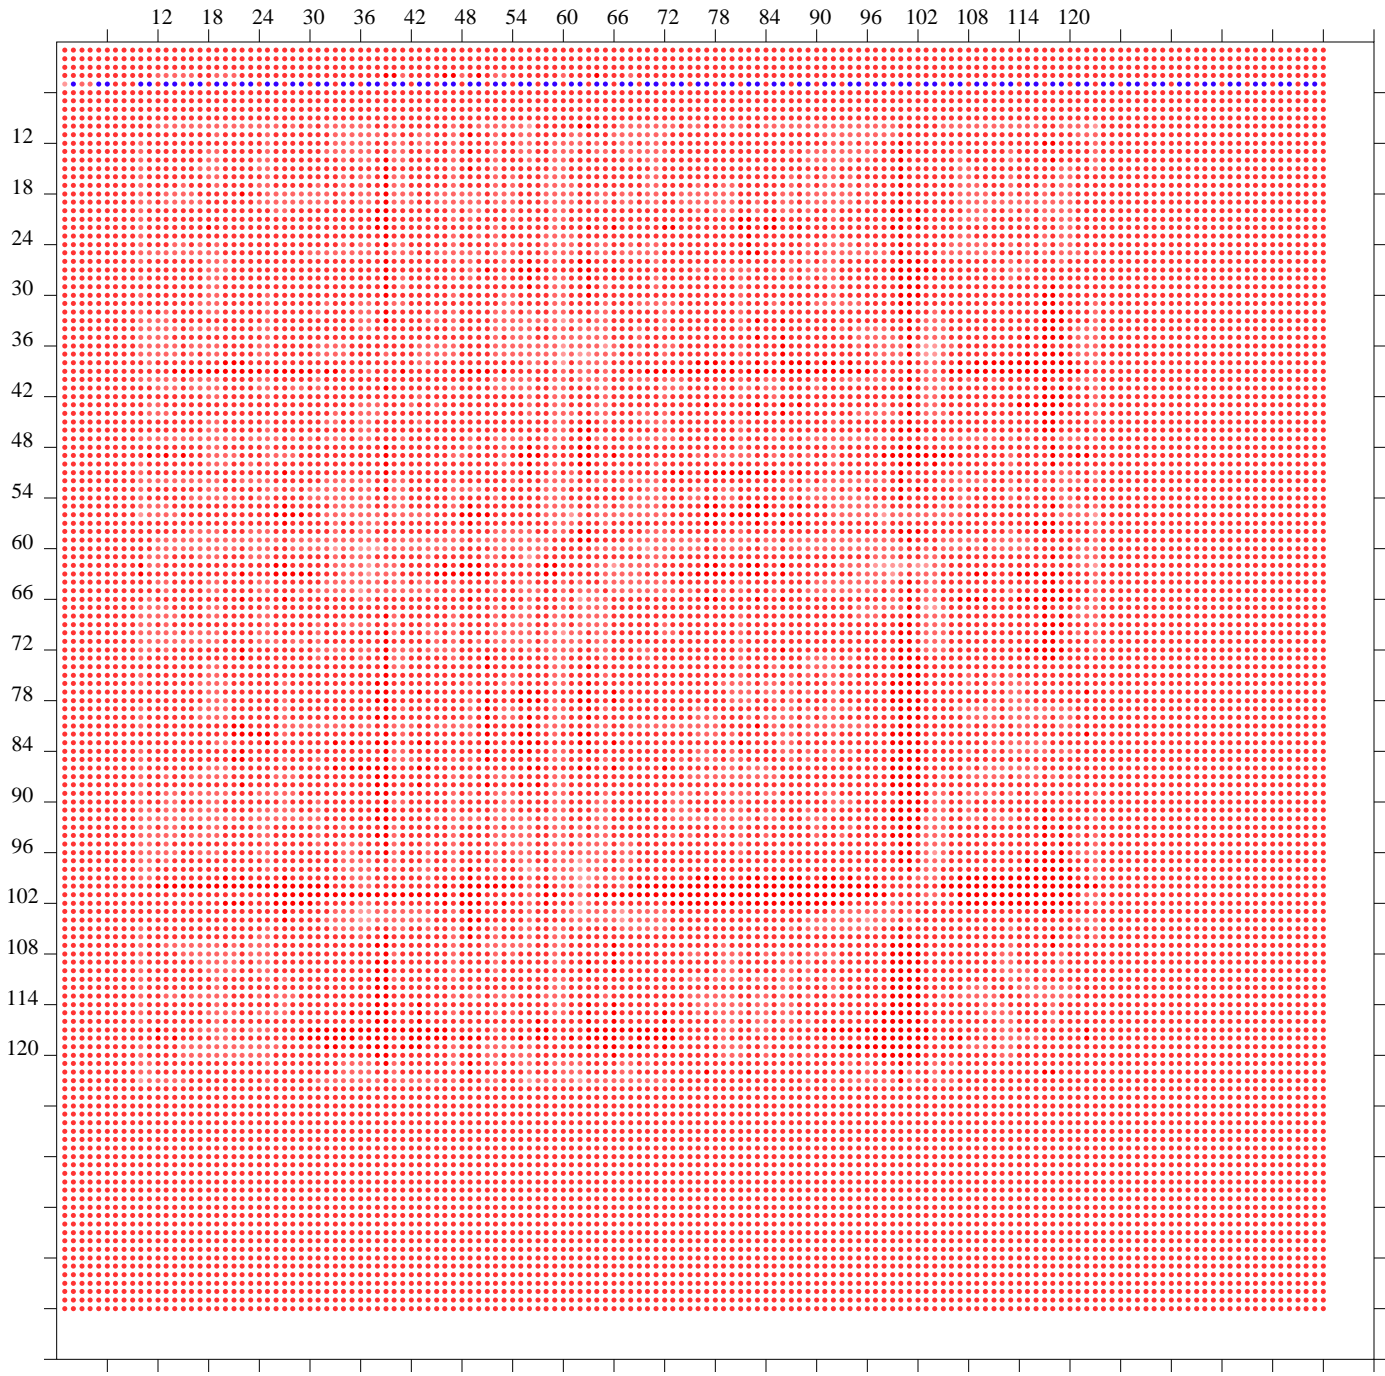

# 1bmz ver 1tsh

ALPHA CARBON DIFFERENCE DISTANCE

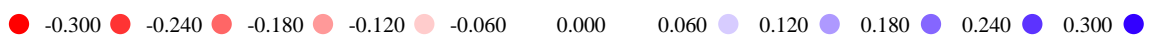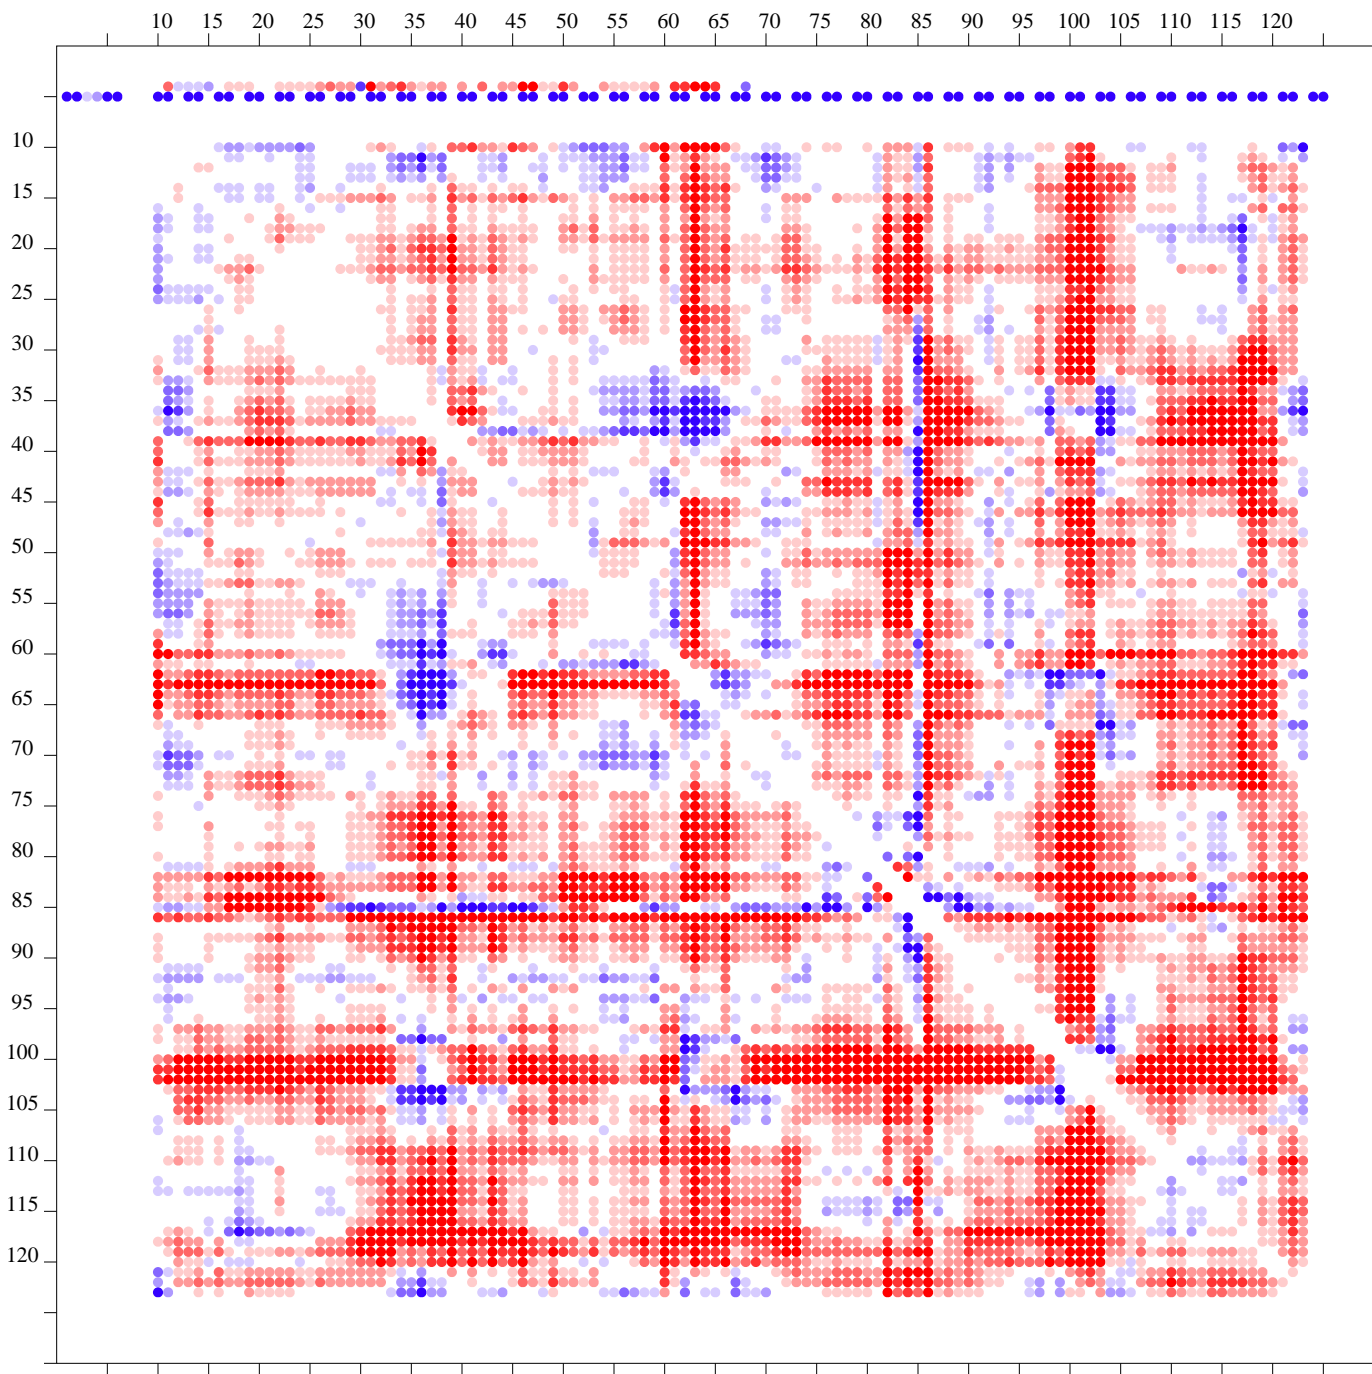

# 1bmz ver 1ttb

ALPHA CARBON DIFFERENCE DISTANCE

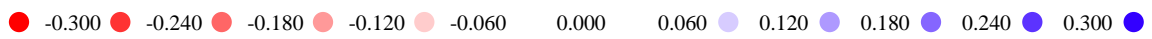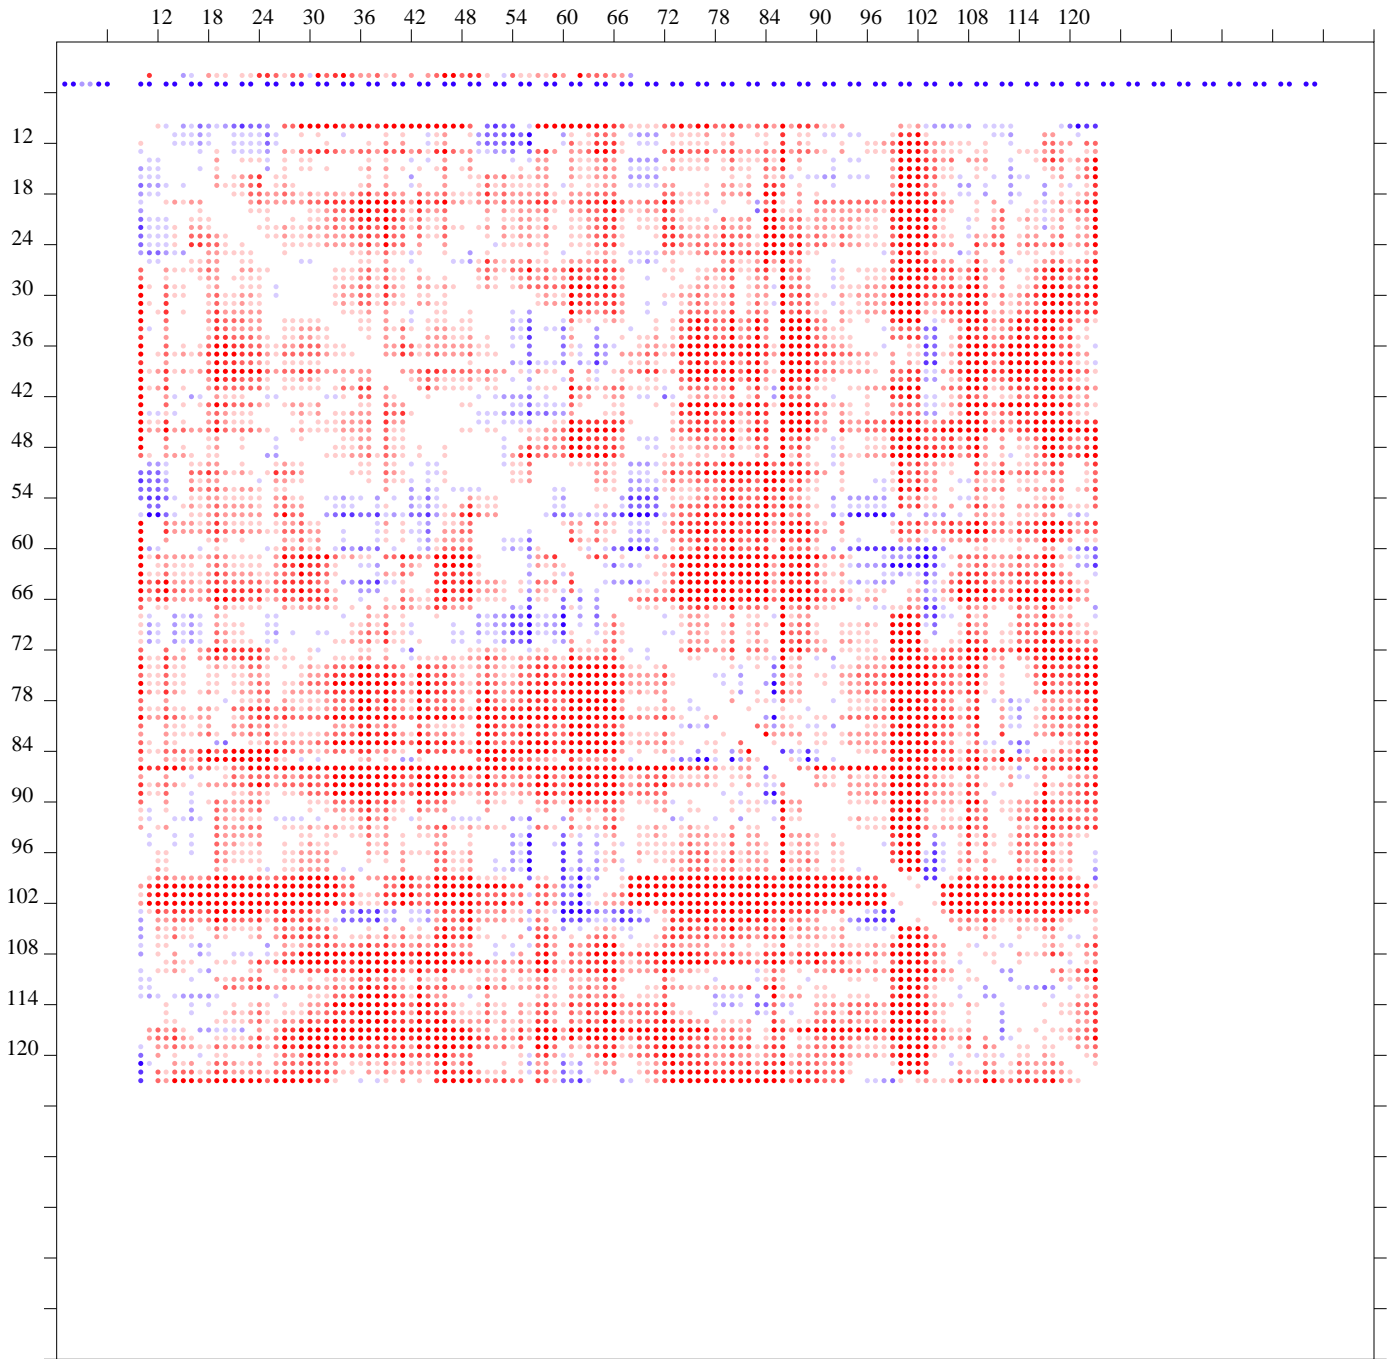

# 1bmz ver 2try

ALPHA CARBON DIFFERENCE DISTANCE

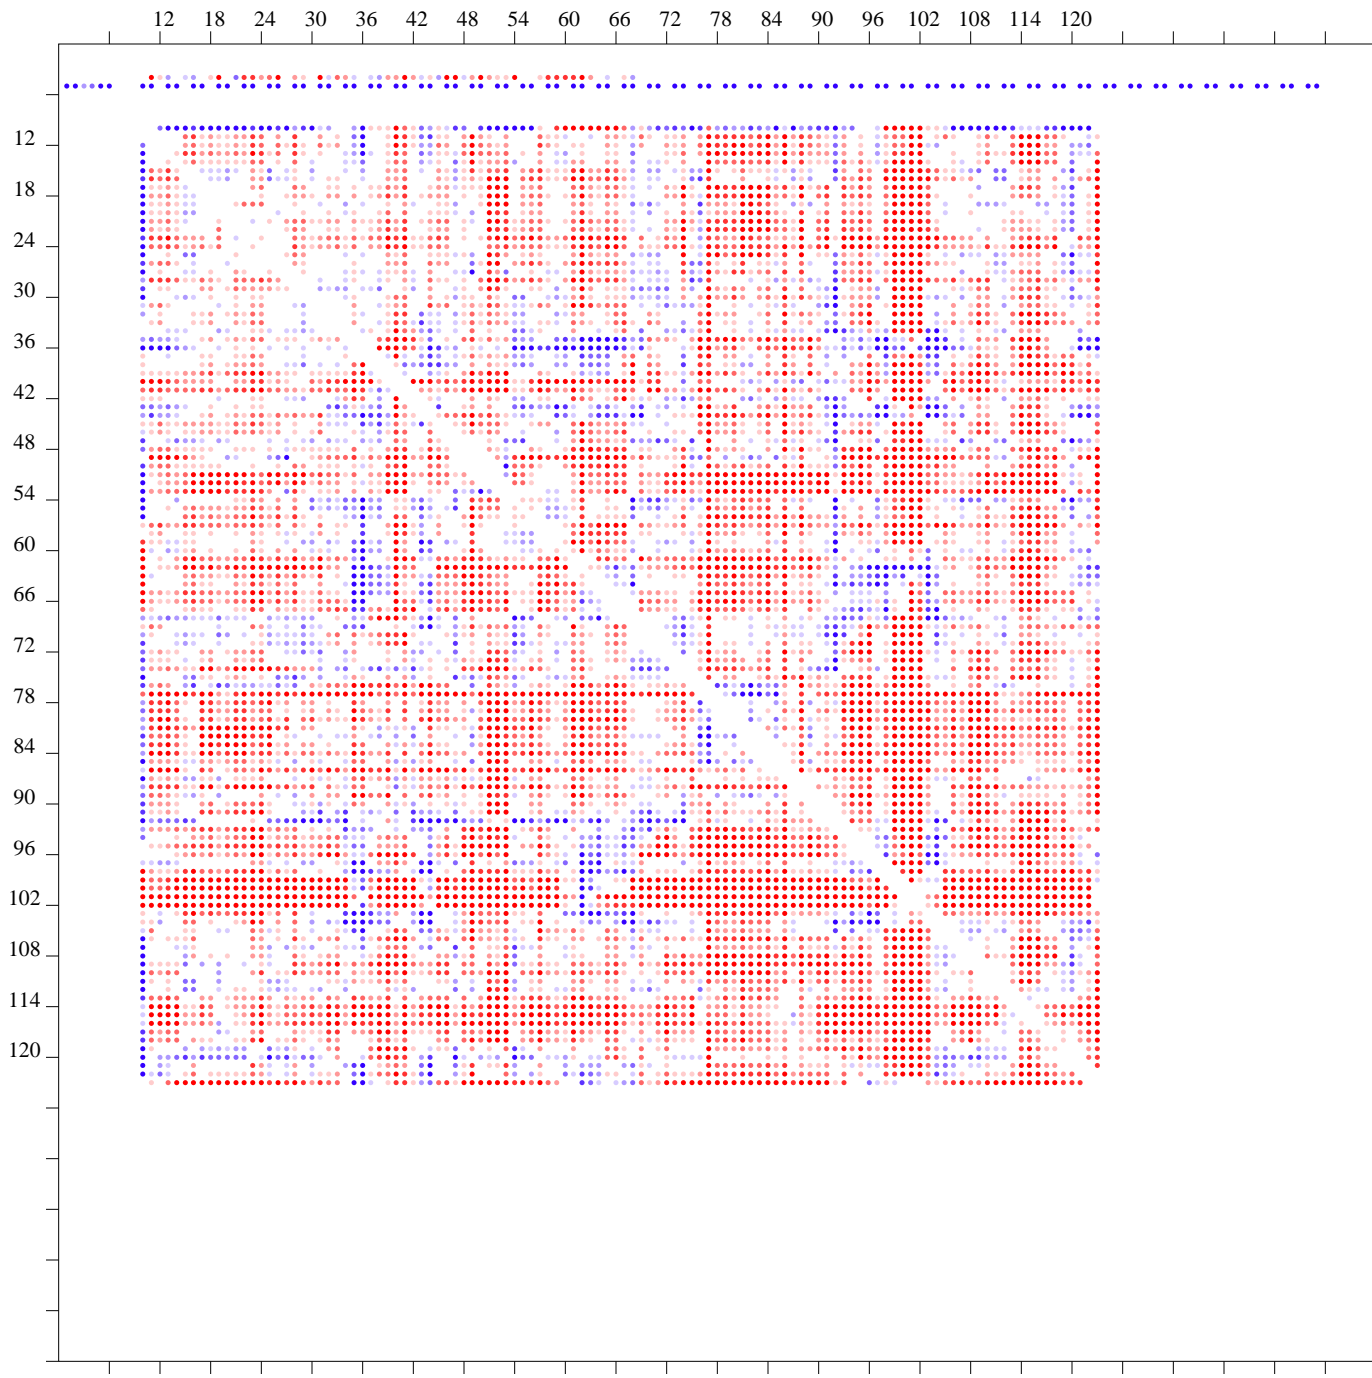



# 1bmz ver 2trh

ALPHA CARBON DIFFERENCE DISTANCE

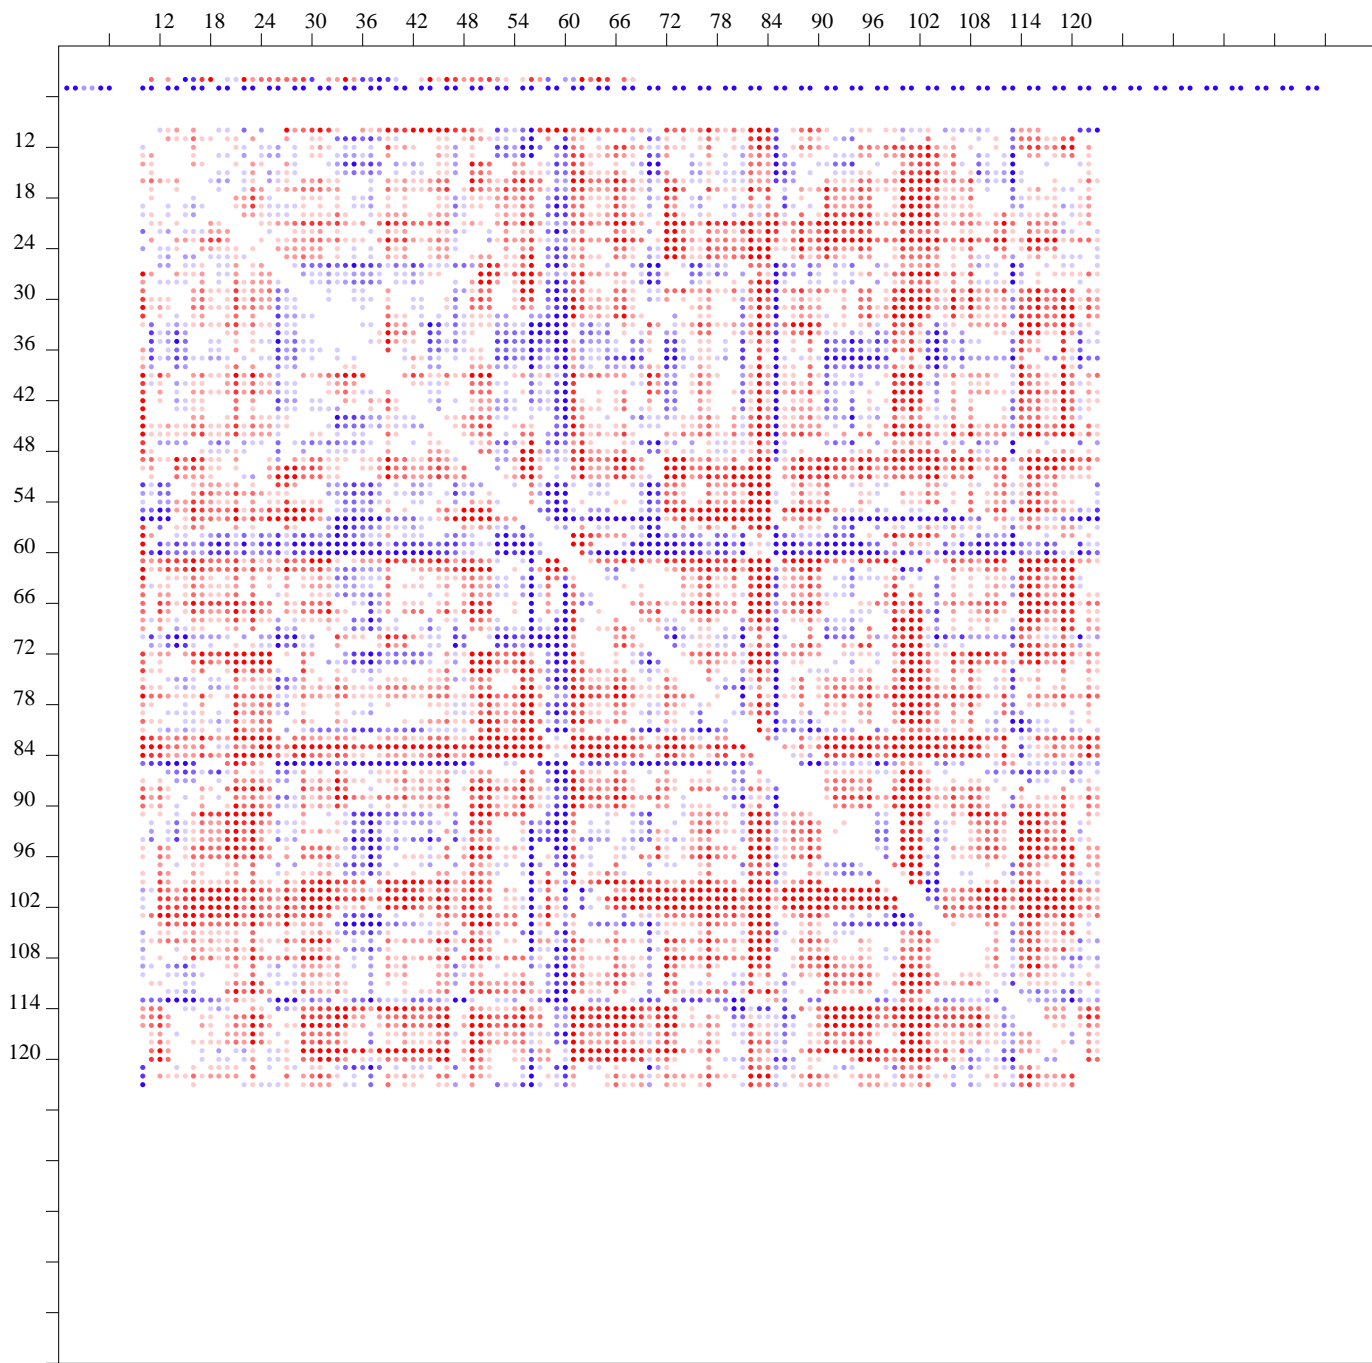

Supplement: pnas_98_6_3139__11.pdf [file pnas_98_6_3139__11.pdf]
