# Supplementary material
Source: PubMed Central journal article supplement (PMC30620)
Supplement: pnas_98_6_3139__12.pdf [file pnas_98_6_3139__12.pdf]

Appendix A. RMSDs of the mutants against their wild types

| Protein ID                                             | Mutation                 | Type <sup>a</sup>  | RMSD (Å) | 1 <sup>st</sup> and 2 <sup>nd</sup> largest deviations (Å) |      | Corresponding residues <sup>b</sup> |         | Resolution (Å) |
|--------------------------------------------------------|--------------------------|--------------------|----------|------------------------------------------------------------|------|-------------------------------------|---------|----------------|
| <b>T4 Lysozyme (wild type: 3lzm. Resolution- 1.7 )</b> |                          |                    |          |                                                            |      |                                     |         |                |
| 220l                                                   | C54t, C97a, M102a        | C-c, C-h, H-a      | 0.16     | 0.53                                                       | 0.39 | Asn 55                              | Ala 98  | 1.8            |
| 221l                                                   | A49s, C54t, C97a         | H-c, C-c, C-h      | 0.112    | 0.32                                                       | 0.25 | Asn 40                              | Lys 43  | 1.7            |
| 222l                                                   | C54t, C97a, M102a        | C-c, C-h, H-h      | 0.17     | 0.39                                                       | 0.37 | Arg 52                              | Gly 113 | 1.9            |
| 223l                                                   | L133g                    | H-g                | 0.212    | 0.89                                                       | 0.43 | Gly 113                             | Glu 22  | 1.9            |
| 224l                                                   | C54t, A93s, C97a         | C-c, H-c, C-h      | 0.22     | 0.27                                                       | 0.27 | Val 57                              | Gly 77  | 1.8            |
| 227l                                                   | C54t, C97a, F104a        | C-c, C-h, H-h      | 0.20     | 0.43                                                       | 0.39 | Asn 40                              | Thr 109 | 2.0            |
| 229l                                                   | C54t, R95a, C97a         | C-c, C-h, C-h      | 0.18     | 0.33                                                       | 0.31 | Asn 40                              | Thr 109 | 1.8            |
| 230l                                                   | M6l, C54t, C97a          | H-h, C-c, C-h      | 0.19     | 0.62                                                       | 0.39 | Arg 76                              | Thr 115 | 1.9            |
| 231l                                                   | C54t, C97a, M106k        | C-c, C-h, H-c      | 0.21     | 0.56                                                       | 0.48 | Arg 76                              | Arg52   | 2.5            |
| 232l                                                   | C54t, C97a, M120k        | C-c, C-h, H-c      | 0.18     | 0.42                                                       | 0.36 | Arg 76                              | Gly 113 | 1.7            |
| 233l                                                   | C54t, C97a, M120l        | C-c, C-h, H-h      | 0.16     | 0.54                                                       | 0.33 | Gly 77                              | Asn 40  | 1.9            |
| 234l                                                   | C54t, C97a, M106l        | C-c, C-h, H-h      | 0.18     | 0.52                                                       | 0.49 | Gly 77                              | Leu 106 | 1.9            |
| 235l                                                   | C54t, C97a, V111a        | C-c, C-h, H-h      | 0.16     | 0.45                                                       | 0.38 | Gly 113                             | Arg 76  | 1.9            |
| 236l                                                   | C54t, V87a, C97a         | C-c, H-h, C-h      | 0.12     | 0.49                                                       | 0.44 | Lys 83                              | Asn 40  | 1.9            |
| 237l                                                   | C54t, C97a, V149a        | C-c, C-h, H-h      | 0.15     | 0.44                                                       | 0.32 | Arg 76                              | Asn 40  | 1.7            |
| 238l                                                   | C54t, C97a, V103a        | C-c, C-h, H-h      | 0.17     | 0.56                                                       | 0.38 | Arg 76                              | Gly 113 | 1.8            |
| 239l                                                   | I17a, C54t, C97a         | H-h, C-c, C-h      | 0.19     | 0.62                                                       | 0.36 | Pro 37                              | Gly 113 | 1.8            |
| 240l                                                   | I27a, C54t, C97a         | H-h, C-c, C-h      | 0.17     | 0.40                                                       | 0.36 | Lys 16                              | Ala 49  | 1.7            |
| 241l                                                   | I29a, C54t, C97a         | H-h, C-c, C-h      | 0.23     | 0.89                                                       | 0.64 | Leu 13                              | Ala 29  | 1.7            |
| 242l                                                   | I50a, C54t, C97a         | H-h, C-c, C-h      | 0.16     | 0.40                                                       | 0.35 | Ala 50                              | Ser 38  | 1.8            |
| 243l                                                   | C54t, I58a, C97a         | C-c, H-h, C-h      | 0.15     | 0.36                                                       | 0.35 | Asn 40                              | Ala 63  | 1.7            |
| 244l                                                   | C54t, C97a, I100a        | C-c, C-h, H-h      | 0.20     | 0.59                                                       | 0.44 | Val 75                              | Ser 38  | 1.7            |
| 245l                                                   | M6a, C54t, C97a          | H-h, C-c, C-h      | 0.17     | 0.55                                                       | 0.36 | Asn 40                              | Arg 76  | 1.8            |
| 246l                                                   | C54t, F67a, C97a         | C-c, H-h, C-h      | 0.23     | 0.51                                                       | 0.50 | Asp 61                              | Asn 40  | 1.8            |
| 247l                                                   | C54t, L84a, C97a         | C-c, H-h, C-h      | 0.37     | 2.25                                                       | 0.43 | Ala 112                             | Asn 40  | 1.7            |
| 248l                                                   | T27a, I29a, C54t, C97a   | C-h, H-h, C-c, C-h | 0.21     | 0.59                                                       | 0.48 | Lys 16                              | Ser 36  | 1.9            |
| 249l                                                   | I27a, C54t, I58a, C97a   | H-h, C-c, H-h, C-h | 0.19     | 0.49                                                       | 0.34 | Leu 46                              | Ala 93  | 1.9            |
| 250l                                                   | I29a, C54t, I58a, C97a   | H-h, C-c, H-h, C-h | 0.24     | 0.88                                                       | 0.66 | Leu 13                              | Ala 29  | 1.8            |
| 251l                                                   | C54t, C97a, L121a, L133a | C-c, C-h, H-h, H-h | 0.38     | 1.10                                                       | 1.20 | Gly 113                             | Arg 54  | 2.6            |
| 253l                                                   | D20a C54t, C97a          | C-h, C-c, C-h      | 0.17     | 0.42                                                       | 0.32 | Thr 21                              | Lys 16  | 2.0            |
| 254l                                                   | D20s, C54t, C97a         | C-c, C-c, C-h      | 0.15     | 0.43                                                       | 0.38 | Gly 77                              | Asn 40  | 1.9            |
| 255l                                                   | D20n, C54t, C97a         | C-c, C-c, C-h      | 0.13     | 0.36                                                       | 0.33 | Gly 77                              | Asn 40  | 1.8            |
| 256l                                                   | M6i                      | H-h                | 0.16     | 0.33                                                       | 0.27 | Asn 40                              | Gly 113 | 1.8            |
| 2178                                                   | C54t, C97a, V111i        | C-c, C-h, H-h      | 0.37     | 2.26                                                       | 0.36 | Gly 113                             | Glu 22  | 2.0            |
| 102l                                                   | Ins N40-a, C54t, C97a    | Ins h, C-c, C-h    | 0.23     | 2.34                                                       |      | Asn 40                              |         | 1.7            |
| 104l                                                   | Ins S44-aa, C54t, C97a   | Ins h,h, C-c, C-h  | 1.24     | 6.48                                                       | 1.31 | Ala 41                              | Arg 76  | 2.8            |
| 107l                                                   | S44g, C54t, C97a         | C-g, C-c, C-h      | 0.13     | 0.35                                                       | 0.34 | Asn 40                              | Gly 113 | 1.8            |
| 108l                                                   | S44i, C54t, C97a         | C-h, C-c, C-h      | 0.11     | 0.24                                                       | 0.23 | Asn 40                              | Thr 15  | 1.8            |
| 109l                                                   | S44k, C54t, C97a         | C-c, C-c, C-h      | 0.15     | 0.49                                                       | 0.28 | Gly 113                             | Gly 56  | 1.8            |
| 110l                                                   | S44l, C54t, C97a         | C-h, C-c, C-h      | 0.15     | 0.57                                                       | 0.26 | Thr 15                              | Asn 53  | 1.7            |
| 111l                                                   | S44n, C54t, C97a         | C-c, C-c, C-h      | 0.17     | 0.54                                                       | 0.45 | Gly 113                             | Ser 38  | 1.8            |
| 112l                                                   | S44p, C54t, C97a         | C-h, C-c, C-h      | 0.15     | 0.67                                                       | 0.20 | Asn 40                              | Leu 79  | 1.8            |
| 113l                                                   | S44r, C54t, C97a         | C-c, C-c, C-h      | 0.14     | 0.50                                                       | 0.30 | Gly 113                             | Thr 54  | 1.8            |
| 114l                                                   | S44t, C54t, C97a         | C-c, C-c, C-h      | 0.11     | 0.28                                                       | 0.25 | Gly 77                              | Thr 54  | 1.8            |
| 115l                                                   | S44v, C54t, C97a         | C-h, C-c, C-h      | 0.12     | 0.25                                                       | 0.25 | Gly 113                             | Val 44  | 1.8            |
| 118l                                                   | C54t, C97a, A130s        | C-c, C-h, H-c      | 0.12     | 0.26                                                       | 0.26 | Gly 56                              | Gly 77  | 1.8            |
| 119l                                                   | C54t, C97a, A134s        | C-c, C-h, H-c      | 0.12     | 0.31                                                       | 0.21 | Val 57                              | Gly 77  | 1.6            |
| 120l                                                   | A41s, C54t, C97a         | H-c, C-c, C-c      | 0.14     | 0.37                                                       | 0.29 | Thr 54                              | Arg 76  | 1.8            |
| 122l                                                   | C54t, A73s, C97a         | C-c, H-c, C-c      | 0.11     | 0.23                                                       | 0.21 | Asn 40                              | Ala 93  | 1.8            |
| 123l                                                   | C54t, A82s, C97a         | C-c, H-c, C-c      | 0.13     | 0.29                                                       | 0.25 | Asn 40                              | Ala 93  | 1.8            |

|      |                                 |                         |      |      |      |         |         |     |
|------|---------------------------------|-------------------------|------|------|------|---------|---------|-----|
| 125l | C54t, C97a, A98s                | C-c, C-h, H-c           | 0.15 | 0.31 | 0.28 | Asn 40  | Gly 77  | 1.8 |
| 126l | C54t, C97a, V149t               | C-c, C-h, H-c           | 0.14 | 0.30 | 0.22 | Lys 43  | Trp 58  | 1.8 |
| 127l | C54t, V75t, C97a                | C-c, H-c, C-h           | 0.21 | 0.49 | 0.41 | Thr 75  | Glu 108 | 1.8 |
| 128l | C54t, V87t, C97a                | C-c, H-c, C-h           | 0.16 | 0.34 | 0.33 | Lys 83  | Asn 53  | 1.7 |
| 129l | C54t, A93t, C97a                | C-c, H-c, C-h           | 0.14 | 0.28 | 0.25 | Asn 40  | Gly 113 | 1.7 |
| 130l | C54t, C97a, T151s               | C-c, C-h, C-c           | 0.14 | 0.35 | 0.25 | Asn 40  | Glu 108 | 1.7 |
| 131l | T26s, C54t, C97a                | C-c, C-c, C-h           | 0.15 | 0.35 | 0.32 | Asn 40  | Thr 21  | 1.7 |
| 137l | S44f, C54t, C97a                | C-h, C-c, C-h           | 0.53 | 1.22 | 1.20 | Arg 137 | Thr 21  | 1.8 |
| 138l | C54t, A93c, C97a                | C-c, H-c, C-h           | 0.19 | 0.50 | 0.45 | Cys 93  | Asn 40  | 1.7 |
| 139l | C54t, N68c, A93c, C97a          | C-c, C-c, H-c, C-h      | 0.19 | 0.39 | 0.36 | Asn 40  | Gly 77  | 1.7 |
| 140l | C54t, C97a, L121a, A129m, F153l | C-c, C-h, H-h, H-h, H-h | 0.22 | 1.01 | 0.38 | Gly 113 | Arg 54  | 2.1 |
| 141l | C54t, C97a, L121a, A129m, V149i | C-c, C-h, H-h, H-h, H-h | 0.17 | 0.47 | 0.33 | Gly 113 | Asn 40  | 2.0 |

### Myoglobin (wild type 105m. Resolution- 2.0)

|      |                         |                    |      |       |      |         |        |     |
|------|-------------------------|--------------------|------|-------|------|---------|--------|-----|
| 101m | F46v, D122n             | H-h, C-c           | 0.82 | 3.97  | 1.43 | Gly 121 | His 64 | 2.0 |
| 102m | H64a, D122n             | C-h, C-c           | 0.84 | 3.86  | 1.59 | Gly 121 | Asp 60 | 1.8 |
| 106m | V68f, D122n             | H-h, C-c           | 0.79 | 3.81  | 1.23 | Gly 121 | Glu 59 | 1.9 |
| 109m | D122n                   | C-p                | 0.80 | 3.96, | 1.18 | Gly 121 | His 48 | 1.8 |
| 1ch1 | L89g, D122n             | H-g, C-c           | 0.80 | 3.77  | 1.06 | Gly 121 | His 48 | 1.9 |
| 1ch2 | L89f, D122n             | H-h, C-c           | 0.80 | 3.83  | 1.09 | Gly 121 | His 48 | 1.8 |
| 1ch3 | L89w, D122n             | H-c, C-c           | 0.78 | 3.84  | 0.84 | Gly 121 | His 48 | 2.0 |
| 1ch5 | H97v, D122n             | C-h, C-c           | 0.95 | 3.84  | 1.17 | Gly 121 | Val 97 | 2.1 |
| 1ch7 | H97f, D122n             | C-h, C-c           | 0.80 | 3.91  | 0.97 | Gly 121 | His 48 | 1.9 |
| 1ch9 | H97q, D122n             | C-c, C-c           | 0.80 | 3.71  | 1.18 | Gly 121 | His 48 | 1.8 |
| 1cik | I99a, D122n             | H-h, C-c           | 0.92 | 3.96  | 1.02 | Gly 121 | Lys 16 | 1.7 |
| 1cio | I99v, D122n             | H-h, C-c           | 0.79 | 3.77  | 1.05 | Gly 121 | His 48 | 1.6 |
| 1co8 | L104a, D122n            | H-h, C-c           | 0.79 | 3.77  | 1.09 | Gly 121 | His 48 | 1.8 |
| 1co9 | L104v, D122n            | H-h, C-c           | 0.78 | 3.75  | 1.07 | Gly 121 | His 48 | 1.6 |
| 1cp0 | L104n, D122n            | H-c, C-c           | 0.79 | 3.91  | 1.00 | Gly 121 | His 48 | 2.0 |
| 1cp5 | L104f, D122n            | H-h, C-c           | 0.77 | 3.77  | 1.10 | Gly 121 | His 48 | 2.1 |
| 1cpw | L104w, D122n            | H-c, C-c           | 0.77 | 3.83  | 0.98 | Gly 121 | His 48 | 2.2 |
| 1fcs | H64v, T67r              | C-h, C-c           | 0.83 | 3.99  | 0.88 | Gly 121 | His 48 | 1.6 |
| 1hrm | H93y                    | C-c                | 0.68 | 1.43, | 1.11 | Ala 94  | Lys 42 | 1.7 |
| 1jdo | L29f, D122n             | H-h, C-c           | 0.80 | 3.88  | 1.21 | Gly 121 | His 48 | 1.9 |
| 1ltw | L29w, D122n             | H-c, C-c           | 0.80 | 3.99  | 1.06 | Gly 121 | His 48 | 1.7 |
| 1mcy | F29l, Q64h, D122n       | H-h, C-c, C-c      | 0.81 | 3.90  | 1.27 | Gly 121 | His 48 | 1.7 |
| 1mdn | V68n                    | H-c                | 3.89 | 7.17  | 2.81 | His 119 | His 48 | 1.9 |
| 1mgn | H64y, D122n             | C-c, C-c           | 0.84 | 3.85  | 1.37 | Gly 121 | His 48 | 1.9 |
| 1mlf | V68a, D122n             | H-h, C-c           | 0.93 | 3.95  | 1.13 | Gly 121 | His 48 | 2.0 |
| 1mlj | V68f, D122n             | H-h, C-c           | 0.93 | 3.77  | 1.31 | Gly 121 | His 48 | 2.0 |
| 1mlm | V68i, D122n             | H-h, C-c           | 0.90 | 3.84  | 1.20 | Gly 121 | His 48 | 1.8 |
| 1mls | V68l, D122n             | H-h, C-c           | 0.80 | 3.93  | 1.04 | Gly 121 | his 48 | 1.7 |
| 1mlu | H64g, V68a, D122n       | C-g, H-h, C-c      | 0.98 | 3.88  | 1.33 | Gly 121 | Asp 60 | 1.9 |
| 1mnh | H64v, T67r              | C-h, C-c           | 1.06 | 4.43  | 1.83 | Gly 121 | His 48 | 2.3 |
| 1mni | H64v, V68h              | C-h, H-c           | 0.76 | 2.79  | 1.03 | Gly 121 | Phe 46 | 2.0 |
| 1mno | V68n                    | H-p                | 3.90 | 7.09  | 2.75 | His 119 | His 48 | 1.9 |
| 1moa | L29f, D122n             | H-h, C-c           | 0.83 | 3.95  | 1.38 | Gly 121 | His 48 | 1.9 |
| 1mob | H64g, D122n             | C-g, C-c           | 0.98 | 3.90  | 1.21 | Gly 121 | His 48 | 2.2 |
| 1moc | H64t, D122n             | C-c, C-c           | 0.84 | 3.93  | 1.53 | Gly 121 | His 48 | 2.0 |
| 1mti | F46l, D122n             | H-h, C-c           | 0.80 | 3.94  | 1.37 | Gly 121 | Asp 60 | 1.9 |
| 1mtj | F46v, D122n             | H-h, C-c           | 0.85 | 3.92  | 1.59 | Gly 121 | Asp 60 | 1.7 |
| 1myh | K45r                    | C-c                | 0.88 | 3.09  | 0.86 | Gly 121 | Thr 95 | 1.9 |
| 1myi | K45s                    | C-c                | 0.72 | 2.65  | 1.03 | Gly 121 | Ser 45 | 2.0 |
| 1myj | V68t                    | H-c                | 0.86 | 2.75  | 1.91 | Gly 121 | Lys 45 | 1.9 |
| 1obm | L29f, H64q, V68f, D122n | H-h, P-p, H-h, C-p | 0.83 | 3.86  | 1.54 | Gly 121 | Asp 60 | 1.8 |
| 1ofj | L29h, H64l, D122n       | H-c, C-h, C-c      | 0.82 | 3.91  | 1.43 | Gly 121 | His 48 | 1.8 |
| 1ofk | F43h, H64l, D122n       | H-c, C-h, C-c      | 0.81 | 3.83  | 1.40 | Gly 121 | His 48 | 1.8 |
| 1tes | D123n                   | C-c                | 0.79 | 3.93  | 1.19 | Gly 121 | His 48 | 1.7 |

|      |             |          |      |      |      |         |        |     |
|------|-------------|----------|------|------|------|---------|--------|-----|
| 1xch | L104n       | H-c      | 0.62 | 0.97 | 0.82 | Lys 45  | Gln 91 | 1.7 |
| 1yca | V68t        | H-c      | 0.76 | 2.84 | 0.92 | Gly 121 | Lys 45 | 2.2 |
| 2mgb | H64g, D122n | H-g, C-c | 0.97 | 3.97 | 1.34 | Gly 121 | Asp 60 | 2.0 |
| 2mgc | H64l, D122n | C-h, C-c | 0.84 | 3.97 | 1.31 | Gly 121 | His 48 | 1.9 |
| 2mgf | H64q, D122n | C-c, C-c | 0.90 | 3.87 | 1.35 | Gly 121 | His 48 | 1.8 |
| 2mgi | H64t, D122n | C-c, C-c | 0.85 | 3.91 | 1.58 | Gly 121 | Asp 60 | 2.0 |
| 2mgj | H64v, D122n | C-h, C-c | 0.86 | 3.98 | 1.47 | Gly 121 | His 48 | 2.0 |
| 2mm1 | K45r, C110a | C-c, C-c | 0.84 | 2.79 | 1.47 | Gly 121 | Lys 16 | 2.8 |
| 2spm | L29f, D122n | H-h, C-c | 0.80 | 4.04 | 0.89 | Gly 121 | Lys 16 | 1.7 |
| 2spo | L29v, D122n | H-h, C-c | 0.84 | 3.74 | 1.16 | Gly 121 | His 48 | 1.7 |

**Transthyretin (wild type: 1bmz A Resolution- 2.0)**

|      |         |       |      |      |      |         |         |     |
|------|---------|-------|------|------|------|---------|---------|-----|
| 1tsh | A60t    | H-c   | 0.24 | 0.80 | 0.52 | Ser 85  | Glu 63  | 1.7 |
| 1ttc | V30m    | H-h   | 0.33 | 0.71 | 0.68 | Met 30  | Ser 100 | 1.7 |
| 1ttb | A109t   | H-c   | 0.23 | 0.58 | 0.56 | Cys 10  | Ser 100 | 1.7 |
| 2trh | R10c    | C-c   | 0.23 | 0.70 | 0.49 | His 56  | Ser 100 | 1.9 |
| 2try | S77y    | C-c   | 0.26 | 0.70 | 0.58 | Gly 101 | Ser 100 | 2.0 |
| 1bzd | S6g     | C-g   | 0.20 | 0.71 | 0.57 | Ser 100 | Glu 62  | 1.9 |
| 1bze | M119t   | H-c   | 0.21 | 0.62 | 0.55 | Ser 100 | Gly 101 | 1.8 |
| 1bz8 | delV122 | del-h | 0.91 | 5.29 | 4.66 | Pro 102 | Asp 99  | 2.0 |
| 1ttr | V122i   | H-h   | 0.18 | 0.58 | 0.41 | Ser 85  | Ser 100 | 1.9 |

**HIV aspartic proteinase (wild type: 1dif A Resolution- 1.7)**

|      |                 |             |      |      |      |        |        |     |
|------|-----------------|-------------|------|------|------|--------|--------|-----|
| 1a30 | Q7k, L33i, L63i | C-c,H-h,H-h | 0.44 | 1.07 | 0.80 | Pro 39 | Gly 51 | 2.0 |
| 1axa | A28s            | H-c         | 0.41 | 1.46 | 0.86 | Ser 37 | Gly 51 | 2.0 |
| 1az5 | S4h             | C-c         | 1.25 | 4.73 | 2.03 | Pro 40 | Phe 53 | 2.0 |
| 1gnm | V82d            | H-c         | 0.41 | 1.06 | 0.98 | Gly 51 | Ser 37 | 2.3 |
| 1gnn | V82n            | H-c         | 0.39 | 0.87 | 0.81 | Ser 37 | Gly 51 | 2.3 |

**Barnase (wild type: 1a2p A Resolution- 1.5)**

|      |             |          |      |      |      |         |         |     |
|------|-------------|----------|------|------|------|---------|---------|-----|
| 1brh | L14a        | H-h      | 0.10 | 0.46 | 0.34 | Glu 60  | Gly 40  | 2.0 |
| 1bne | A43c, S80c  | H-c, C-c | 3.79 | 5.07 | 4.88 | Asn 41  | Ala 32  | 2.1 |
| 1bnf | T70c, S92c  | C-c, C-c | 1.06 | 6.22 | 0.75 | Gly 68  | Gly 40  | 2.0 |
| 1bng | S85c, H102c | C-c, C-c | 0.22 | 6.27 | 0.75 | Gly 68  | Gly 40  | 2.1 |
| 1bri | I76a        | H-h      | 0.23 | 0.62 | 0.49 | Ser 67  | Gly 48  | 1.9 |
| 1brj | I88a        | H-h      | 0.18 | 0.42 | 0.27 | Lys 66  | Gly 40  | 2.0 |
| 1brk | I96a        | H-h      | 0.29 | 0.75 | 0.49 | Ser 67  | Gly 40  | 2.0 |
| 1b20 | R69s        | C-c      | 0.30 | 1.06 | 0.96 | Lys 66  | Arg 59  | 1.7 |
| 1b3s | H102a       | C-h      | 0.50 | 1.84 | 0.96 | Arg 59  | Gln 104 | 2.3 |
| 1btu | K27a        | C-h      | 0.50 | 1.27 | 0.72 | Gln 104 | Ser 67  | 1.6 |

**Lactoferrin (wild type: 1bka Resolution- 2.4)**

|      |       |     |      |      |      |         |         |     |
|------|-------|-----|------|------|------|---------|---------|-----|
| 1hse | H253m | C-h | 0.49 | 1.87 | 1.67 | Arg 313 | Pro 284 | 2.2 |
| 1dsn | D60s  | C-c | 1.29 | 2.07 | 1.76 | Ile 314 | Gln 186 | 2.0 |
| 1vfd | R121e | C-c | 0.67 | 3.01 | 1.67 | Arg 313 | Pro 284 | 2.3 |
| 1vfe | R121s | C-c | 0.60 | 2.25 | 1.85 | Arg 313 | Gly 101 | 2.3 |

**Dihydrofolate reductase (wild type: 4dfr A Resolution- 1.7)**

|      |             |          |      |      |      |         |         |     |
|------|-------------|----------|------|------|------|---------|---------|-----|
| 1dhi | D27S        | C-c      | 0.23 | 0.88 | 0.58 | Ser 135 | Pro 66  | 1.9 |
| 1dhj | D27S, F137S | C-c, H-c | 0.28 | 1.00 | 0.69 | Val 136 | Ser 27  | 1.8 |
| 1dra | D27e        | C-c      | 0.25 | 0.85 | 0.54 | Ser 135 | Glu 27  | 1.9 |
| 1drb | D27c        | C-c      | 0.29 | 0.97 | 0.85 | Gly 67  | Ser 135 | 1.9 |
| 2drc | W22f        | C-h      | 0.18 | 0.50 | 0.43 | Val 136 | Gly 67  | 1.9 |

**$\alpha$ -1-antitrypsin (wild type: 2psi Resolution- 2.0)**

|      |                                         |                                |      |       |       |         |         |     |
|------|-----------------------------------------|--------------------------------|------|-------|-------|---------|---------|-----|
| 1atu | F51l, T59a, T68a,<br>A70g, M374i, S381a | H-h, C-h, C-h<br>C-g, H-h, C-h | 2.19 | 9.37  | 7.57  | Ala 355 | Glu 354 | 2.7 |
| 1kct | T59a, T68a, A70g                        | C-h, C-h, H-g                  | 2.60 | 13.37 | 12.11 | Ala 350 | Pro 357 | 3.4 |
| 1psi | F51l                                    | H-h                            | 0.30 | 3.60  | 0.69  | Ala 348 | Ala 350 | 2.9 |

**BP-RNase A (wild type: 1rph Resolution- 2.2)**

|      |                 |               |      |      |      |        |                |     |
|------|-----------------|---------------|------|------|------|--------|----------------|-----|
| 1a5q | P93a            | C-h           | 0.28 | 0.71 | 0.45 | Lys 37 | Ser 21         | 2.3 |
| 3rsk | K7a, R10a, K66a | C-h, C-h, C-h | 0.34 | 1.48 | 0.60 | Ser 89 | Ser 22         | 2.0 |
| 3rsd | D121n           | C-c           | 0.39 | 1.04 | 0.98 | Asn 67 | Gly 88, Ser 21 | 1.6 |

**Adenylate kinase (wild type: 1ake A Resolution- 1.9)**

|      |             |          |       |        |       |                  |         |     |
|------|-------------|----------|-------|--------|-------|------------------|---------|-----|
| 1dvr | D89v, R165i | C-h, C-h | 12.74 | 27.78  | 22.35 | Glu 113, Arg 128 | Thr 158 | 2.3 |
| 3aky | I213f       | H-h      | 12.19 | 27.56, | 22.00 | Glu 113, Thr 158 | Arg 128 | 2.2 |

**Calmodulin (wild type: 4cln Resolution- 2.2)**

|      |                        |              |       |       |       |         |         |     |
|------|------------------------|--------------|-------|-------|-------|---------|---------|-----|
| 1ahr | del-Thr 79, del-Asp 80 | del H, del C | 11.66 | 26.35 | 25.45 | Asp 131 | Gly 113 | 1.8 |
| 1deg | del-Glu 84             | del C        | 10.93 | 22.00 | 19.43 | Gly 113 | Glu 127 | 2.9 |
