# Supplementary material
Source: PubMed Central journal article supplement (PMC30620)
Supplement: pnas_98_6_3139__13.pdf [file pnas_98_6_3139__13.pdf]

**Appendix B. B-factors of the largest deviated residues**

| Protein                              | Mutation                 | Position of largest deviation | Corresponding B-factor | Largest B-factor | Corresponding residue |
|--------------------------------------|--------------------------|-------------------------------|------------------------|------------------|-----------------------|
| <b>T4 Lysozyme (wild type: 3lzm)</b> |                          |                               |                        |                  |                       |
| 220l                                 | C54t, C97a, M102a        | Asn 55                        | 67.28                  | 67.28            | Asn 55                |
| 221l                                 | A49s, C54t, C97a         | Asn 40                        | 35.36                  | 66.55            | Lys 162               |
| 222l                                 | C54t, C97a, M102a        | Arg 52                        | 36.14                  | 62.54            | Lys 162               |
| 223l                                 | L133g                    | Gly 113                       | 37.99                  | 87.24            | Asn 55                |
| 224l                                 | C54t, A93s, C97a         | Val 57                        | 22.70                  | 56.23            | Lys 162               |
| 227l                                 | C54t, C97a, F104a        | Asn 40                        | 29.96                  | 54.42            | Lys 162               |
| 229l                                 | C54t, R95a, C97a         | Asn 40                        | 25.11                  | 57.56            | Lys 162               |
| 230l                                 | M6l, C54t, C97a          | Arg 76                        | 22.45                  | 41.61            | Asn 55                |
| 231l                                 | C54t, C97a, M106k        | Arg 76                        | 22.21                  | 57.70            | Lys 162               |
| 232l                                 | C54t, C97a, M120k        | Arg 76                        | 16.93                  | 37.76            | Lys 162               |
| 233l                                 | C54t, C97a, M120l        | Gly 77                        | 8.58                   | 45.38            | Lys 162               |
| 234l                                 | C54t, C97a, M106l        | Gly 77                        | 14.36                  | 43.82            | Asn 55                |
| 235l                                 | C54t, C97a, V111a        | Gly 113                       | 29.95                  | 68.89            | Lys 162               |
| 236l                                 | C54t, V87a, C97a         | Lys 83                        | 31.06                  | 65.42            | Lys 162               |
| 237l                                 | C54t, C97a, V149a        | Arg 76                        | 22.14                  | 51.25            | Lys 162               |
| 238l                                 | C54t, C97a, V103a        | Arg 76                        | 16.39                  | 55.04            | Lys 162               |
| 239l                                 | I17a, C54t, C97a         | Pro 37                        | 65.77                  | 100.00           | Asn 55                |
| 240l                                 | I27a, C54t, C97a         | Lys 16                        | 22.44                  | 50.72            | Lys 162               |
| 241l                                 | I29a, C54t, C97a         | Leu 13                        | 22.92                  | 76.84            | Lys 162               |
| 242l                                 | I50a, C54t, C97a         | Ala 50                        | 18.01                  | 52.12            | Lys 162               |
| 243l                                 | C54t, I58a, C97a         | Asn 40                        | 31.98                  | 67.62            | Lys 162               |
| 244l                                 | C54t, C97a, I100a        | Val 75                        | 20.73                  | 52.29            | Lys 162               |
| 245l                                 | M6a, C54t, C97a          | Asn 40                        | 31.93                  | 51.24            | Lys 162               |
| 246l                                 | C54t, F67a, C97a         | Asp 61                        | 10.17                  | 55.98            | Lys 162               |
| 247l                                 | C54t, L84a, C97a         | Ala 112                       | 58.13                  | 78.14            | Thr 109               |
| 248l                                 | T27a, I29a, C54t, C97a   | Lys 16                        | 21.12                  | 52.40            | Lys 35                |
| 249l                                 | I27a, C54t, I58a, C97a   | Leu 46                        | 14.90                  | 53.21            | Lys 162               |
| 250l                                 | I29a, C54t, I58a, C97a   | Leu 13                        | 19.90                  | 61.32            | Lys 162               |
| 251l                                 | C54t, C97a, L121a, L133a | Gly 113                       | 48.75                  | 73.15            | Lys 124               |
| 253l                                 | D20a, C54t, C97a         | Thr 21                        | 38.16                  | 51.70            | Lys 162               |
| 254l                                 | D20s, C54t, C97a         | Gly 77                        | 10.95                  | 46.49            | Lys 162               |
| 255l                                 | D20n, C54t, C97a         | Gly 77                        | 14.81                  | 48.93            | Lys 162               |
| 256l                                 | M6i                      | Asn 40                        | 32.64                  | 86.82            | Asn 163               |
| 2178                                 | C54t, C97a, V111i        | Gly 113                       | 19.64                  | 47.87            | Glu 108               |
| 102l                                 | Ins N40-a, C54t, C97a    | Asn 40                        | 48.90                  | 100.00           | Ser 36                |
| 104l                                 | Ins S44-aa, C54t, C97a   | Ala 41                        | 64.31                  | 79.89            | Thr 115               |
| 107l                                 | S44g, C54t, C97a         | Asn 40                        | 47.10                  | 50.87            | Ser 36                |
| 108l                                 | S44i, C54t, C97a         | Asn 40                        | 25.45                  | 42.98            | Lys 162               |
| 109l                                 | S44k, C54t, C97a         | Gly 113                       | 25.45                  | 40.40            | Asn 55                |
| 110l                                 | S44l, C54t, C97a         | Thr 15                        | 11.87                  | 42.54            | Lys 162               |
| 111l                                 | S44n, C54t, C97a         | Gly 113                       | 36.60                  | 44.94            | Lys 162               |
| 112l                                 | S44p, C54t, C97a         | Asn 40                        | 45.44                  | 45.44            | Asn 40                |
| 113l                                 | S44r, C54t, C97a         | Gly 113                       | 27.49                  | 46.14            | Lys 162               |
| 114l                                 | S44t, C54t, C97a         | Gly 77                        | 15.90                  | 43.19            | Lys 162               |
| 115l                                 | S44v, C54t, C97a         | Gly 113                       | 14.35                  | 46.04            | Lys 162               |
| 118l                                 | C54t, C97a, A130s        | Gly 56                        | 17.78                  | 34.82            | Lys 162               |
| 119l                                 | C54t, C97a, A134s        | Val 57                        | 16.64                  | 48.61            | Lys 162               |

|      |                                 |         |       |       |         |
|------|---------------------------------|---------|-------|-------|---------|
| 120l | A41s, C54t, C97a                | Thr 54  | 18.46 | 36.26 | Ser 36  |
| 122l | C54t, A73s, C97a                | Asn 40  | 22.10 | 37.29 | Lys 162 |
| 123l | C54t, A82s, C97a                | Asn 40  | 23.52 | 44.73 | Lys 162 |
| 125l | C54t, C97a, A98s                | Asn 40  | 23.83 | 38.86 | Lys 162 |
| 126l | C54t, C97a, V149t               | Asn 40  | 25.10 | 49.27 | Lys 162 |
| 127l | C54t, V75t, C97a                | Thr 75  | 15.17 | 35.47 | Ser 36  |
| 128l | C54t, V87t, C97a                | Lys 83  | 31.90 | 39.05 | Ser 36  |
| 129l | C54t, A93t, C97a                | Asn 40  | 29.10 | 51.70 | Ser 36  |
| 130l | C54t, C97a, T151s               | Asn 40  | 28.68 | 56.14 | Lys 162 |
| 131l | T26s, C54t, C97a                | Asn 40  | 23.85 | 51.76 | Lys 162 |
| 137l | S44f, C54t, C97a                | Arg 137 | 21.29 | 40.23 | Thr 109 |
| 138l | C54t, A93c, C97a                | Cys 93  | 10.57 | 73.79 | Asn 55  |
| 139l | C54t, N68c, A93c, C97a          | Asn 40  | 33.69 | 60.78 | Lys 162 |
| 140l | C54t, C97a, L121a, A129m, F153l | Gly 113 | 37.17 | 64.96 | Lys 162 |
| 141l | C54t, C97a, L121a, A129m, V149i | Gly 113 | 22.32 | 84.29 | Asn 55  |

### Myoglobin (wild type 105m)

|      |                   |         |       |       |         |
|------|-------------------|---------|-------|-------|---------|
| 101m | F46v, D122n       | Gly 121 | 19.49 | 47.07 | Gly 153 |
| 102m | H64a, D122n       | Gly 121 | 15.19 | 40.00 | Gly 153 |
| 106m | V68f, D122n       | Gly 121 | 14.17 | 43.92 | Gly 153 |
| 109m | D122n             | Gly 121 | 15.02 | 40.60 | Gly 153 |
| 1ch1 | L89g, D122n       | Gly 121 | 20.13 | 66.99 | Gly 153 |
| 1ch2 | L89f, D122n       | Gly 121 | 17.19 | 54.60 | Gln 152 |
| 1ch3 | L89w, D122n       | Gly 121 | 22.61 | 68.13 | Gln 152 |
| 1ch5 | H97v, D122n       | Gly 121 | 24.10 | 55.71 | Gln 152 |
| 1ch7 | H97f, D122n       | Gly 121 | 13.46 | 56.69 | Gln 152 |
| 1ch9 | H97q, D122n       | Gly 121 | 17.69 | 67.63 | Gln 152 |
| 1cik | I99a, D122n       | Gly 121 | 18.17 | 95.10 | Gly 153 |
| 1cio | I99v, D122n       | Gly 121 | 14.73 | 69.22 | Gly 153 |
| 1co8 | L104a, D122n      | Gly 121 | 19.72 | 83.40 | Gly 153 |
| 1co9 | L104v, D122n      | Gly 121 | 18.04 | 70.97 | Gly 153 |
| 1cp0 | L104n, D122n      | Gly 121 | 21.79 | 94.44 | Gly 153 |
| 1cp5 | L104f, D122n      | Gly 121 | 19.96 | 86.15 | Gly 153 |
| 1cpw | L104w, D122n      | Gly 121 | 17.91 | 96.68 | Gly 153 |
| 1fcs | H64v, T67r        | Gly 121 | 15.85 | 76.73 | Gly 153 |
| 1hrm | H93y              | Ala 94  | 17.79 | 58.39 | Gly 153 |
| 1jdo | L29f, D122n       | Gly 121 | 18.39 | 83.90 | Gln 152 |
| 1ltw | L29w, D122n       | Gly 121 | 18.30 | 50.30 | Gly 153 |
| 1mcy | F29l, Q64h, D122n | Gly 121 | 21.40 | 52.20 | Gly 153 |
| 1mdn | V68n              | His 119 | 21.42 | 79.17 | Gly 153 |
| 1mgn | H64y, D122n       | Gly 121 | 16.20 | 45.40 | Gly 153 |
| 1mlf | V68a, D122n       | Gly 121 | 16.00 | 55.90 | Gly 153 |
| 1mlj | V68f, D122n       | Gly 121 | 15.60 | 49.60 | Gly 153 |
| 1mlm | V68i, D122n       | Gly 121 | 17.00 | 48.80 | Gly 153 |
| 1mls | V68l, D122n       | Gly 121 | 15.10 | 46.10 | Gly 153 |
| 1mlu | H64g, V68a, D122n | Gly 121 | 16.80 | 56.00 | Gly 153 |
| 1mnh | H64v, T67r        | Gly 121 | 4.67  | 56.50 | Gly 1   |
| 1mni | H64v, V68h        | Gly 121 | 31.28 | 82.25 | Gly 153 |
| 1mno | V68n              | His 119 | 21.19 | 74.52 | Gly 153 |
| 1moa | L29f, D122n       | Gly 121 | 16.80 | 43.40 | Gly 153 |
| 1mob | H64g, D122n       | Gly 121 | 19.10 | 54.20 | Gly 153 |
| 1moc | H64t, D122n       | Gly 121 | 18.40 | 49.30 | Gly 153 |
| 1mti | F46l, D122n       | Gly 121 | 13.00 | 42.70 | Gly 153 |
| 1mtj | F46v, D122n       | Gly 121 | 18.60 | 49.40 | Gly 153 |
| 1myh | K45r              | Gly 121 | 31.16 | 65.06 | Gly 153 |
| 1myi | K45s              | Gly 121 | 38.88 | 79.92 | Gly 153 |

|      |                         |         |       |       |         |
|------|-------------------------|---------|-------|-------|---------|
| 1myj | V68t                    | Gly 121 | 27.44 | 76.92 | Gly 153 |
| 1obm | L29f, H64q, V68f, D122n | Gly 121 | 14.30 | 39.90 | Gly 153 |
| 1ofj | L29h, H64l, D122n       | Gly 121 | 15.80 | 50.32 | Gly 153 |
| 1ofk | F43h, H64l, D122n       | Gly 121 | 17.20 | 50.90 | Gly 153 |
| 1tes | D123n                   | Gly 121 | 18.00 | 43.90 | Gly 154 |
| 1xch | L104n                   | Lys 45  | 24.85 | 52.18 | Gly 153 |
| 1yca | V68t                    | Gly 121 | 24.98 | 39.38 | Gly 153 |
| 2mgb | H64g, D122n             | Gly 121 | 18.50 | 54.50 | Gly 153 |
| 2mgc | H64l, D122n             | Gly 121 | 15.10 | 36.60 | Gly 153 |
| 2mgf | H64q, D122n             | Gly 121 | 17.90 | 52.30 | Gly 153 |
| 2mgi | H64t, D122n             | Gly 121 | 17.90 | 48.70 | Gly 153 |
| 2mgj | H64v, D122n             | Gly 121 | 19.10 | 49.30 | Gly 153 |
| 2mm1 | K45r, C110a             | Gly 121 | 14.71 | 40.99 | Gly 153 |
| 2spm | L29f, D122n             | Gly 121 | 16.60 | 44.90 | Gly 153 |
| 2spo | L29v, D122n             | Gly 121 | 17.00 | 46.90 | Gly 153 |

**Transthyretin (wild type: 1bmz A)**

|      |         |         |       |       |         |
|------|---------|---------|-------|-------|---------|
| 1tsh | A60t    | Ser 85  | 30.84 | 69.03 | Pro 102 |
| 1ttc | V30m    | Met 30  | 15.88 | 40.00 | Gly 1   |
| 1ttb | A109t   | Cys 10  | 30.43 | 53.79 | Gly 1   |
| 2trh | R10c    | His 56  | 22.18 | 58.17 | Gly 101 |
| 2try | S77y    | Gly 101 | 19.16 | 49.59 | Pro 102 |
| 1bzd | S6g     | Ser 100 | 36.54 | 68.21 | Pro 102 |
| 1bze | M119t   | Ser 100 | 38.87 | 64.43 | Glu 7   |
| 1bz8 | delV122 | Pro 102 | 58.23 | 66.58 | Pro 102 |
| 1ttr | V122i   | Ser 85  | 23.98 | 85.88 | Ser 8   |

**HIV aspartic proteinase (wild type: 1dif A)**

|      |                 |        |       |       |        |
|------|-----------------|--------|-------|-------|--------|
| 1a30 | Q7k, L33i, L63i | Pro 39 | 36.09 | 47.71 | Gly 68 |
| 1axa | A28s            | Ser 37 | 53.17 | 61.13 | Pro 1  |
| 1az5 | S4h             | Pro 40 | 21.87 | 84.97 | Gly 52 |
| 1gnm | V82d            | Gly 51 | 20.36 | 30.76 | Arg 41 |
| 1gnn | V82n            | Ser 37 | 29.00 | 38.61 | Arg 41 |

**Barnase (wild type: 1a2p A)**

|      |             |         |       |       |        |
|------|-------------|---------|-------|-------|--------|
| 1brh | L14a        | Glu 60  | 35.95 | 35.95 | Glu 60 |
| 1bne | A43c, S80c  | Asn 41  | 15.11 | 28.85 | Ser 67 |
| 1bnf | T70c, S92c  | Gly 68  | 27.82 | 32.00 | Ser 67 |
| 1bng | S85c, H102c | Gly 68  | 28.08 | 32.00 | Ser 67 |
| 1bri | I76a        | Ser 67  | 24.36 | 33.46 | Ser 67 |
| 1brj | I88a        | Lys 66  | 38.10 | 42.37 | Glu 60 |
| 1brk | I96a        | Ser 67  | 30.19 | 30.19 | Ser 67 |
| 1b20 | R69s        | Lys 66  | 31.39 | 35.08 | Gln 2  |
| 1b3s | H102a       | Arg 59  | 30.35 | 59.40 | Gln 62 |
| 1b2u | K27a        | Gln 104 | 22.69 | 59.76 | Ala 32 |

**Lactoferrin (wild type 1bka)**

|      |       |         |       |       |         |
|------|-------|---------|-------|-------|---------|
| 1hse | H253m | Arg 313 | 76.79 | 86.29 | Pro 142 |
| 1dsn | D60s  | Ile 314 | 79.73 | 80.00 | Thr 139 |
| 1vfd | R121e | Arg 313 | 52.43 | 80.00 | Pro 142 |
| 1vfe | R121s | Arg 313 | 38.76 | 57.38 | Thr 139 |

**Dihydrofolate reductase (wild type 4dfr A)**

|      |             |         |       |       |         |
|------|-------------|---------|-------|-------|---------|
| 1dhi | D27S        | Ser 135 | 37.01 | 83.19 | Pro 130 |
| 1dhj | D27S, F137S | Val 136 | 36.63 | 81.73 | Pro 130 |
| 1dra | D27e        | Ser 135 | 44.43 | 72.25 | Pro 130 |
| 1drb | D27c        | Gly 67  | 63.43 | 70.58 | Pro 130 |
| 2drc | W22f        | Val 136 | 40.90 | 70.08 | Pro 130 |

**$\alpha$ -1-antitrypsin (wild type: 2psi)**

|      |                                         |         |       |       |         |
|------|-----------------------------------------|---------|-------|-------|---------|
| 1atu | F51l, T59a, T68a,<br>A70g, M374i, S381a | Ala 355 | 22.34 | 33.08 | Leu 353 |
| 1kct | T59a, T68a, A70g                        | Ala 350 | 20.00 | 20.00 | His 20  |
| 1psi | F51l                                    | Ala 348 | 34.53 | 73.90 | Lys 394 |

**BP-RNase A (wild type: 1rph)**

|      |                 |        |       |        |        |
|------|-----------------|--------|-------|--------|--------|
| 1a5q | P93a            | Lys 37 | 71.92 | 98.33  | Tyr 92 |
| 3rsk | K7a, R10a, K66a | Ser 89 | 63.13 | 100.00 | Lys 1  |
| 3rsd | D121n           | Asn 67 | 14.09 | 44.51  | Ser 21 |

**Adenylate kinase (wild type: 1ake A)**

|      |             |         |       |        |       |
|------|-------------|---------|-------|--------|-------|
| 1dvr | D89v, R165i | Glu 113 | 13.15 |        |       |
| 3aky | I213f       | Glu 113 | 21.20 | 104.91 | Glu 3 |

**Calmodulin (wild type: 4cln)**

|      |                        |         |       |       |       |
|------|------------------------|---------|-------|-------|-------|
| 1ahr | del-Thr 79, del-Asp 80 | Asp 131 | 35.73 | 74.73 | Ala 1 |
| 1deg | del-Glu 84             | Gly 113 | 20.00 | 20.00 | Thr 5 |
