# Supplementary material
Source: PubMed Central journal article supplement (PMC30620)

3lzm-220l

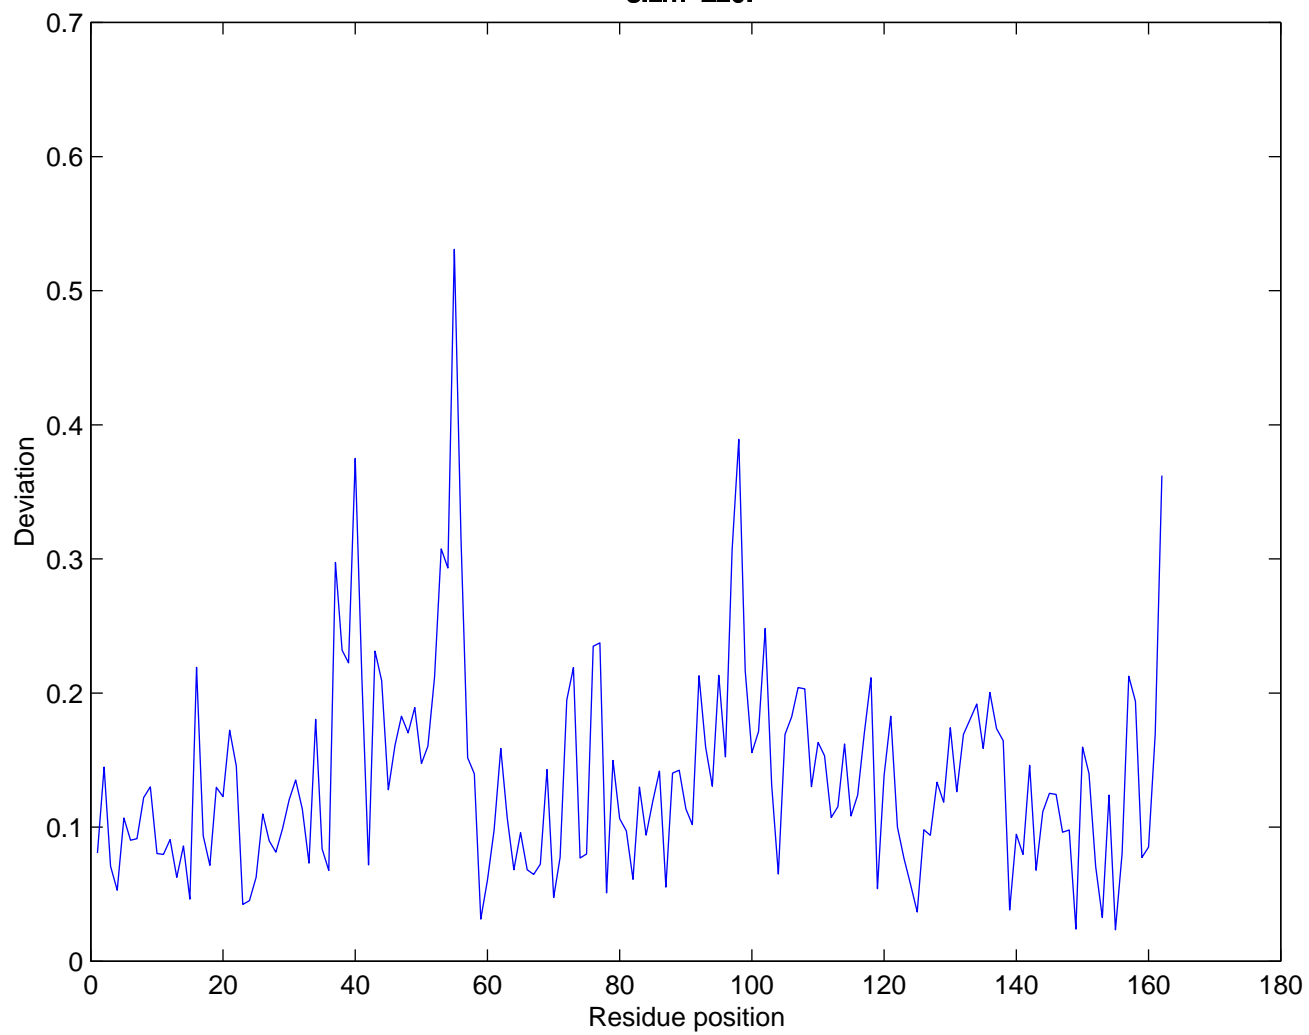

**3lzm-238l**

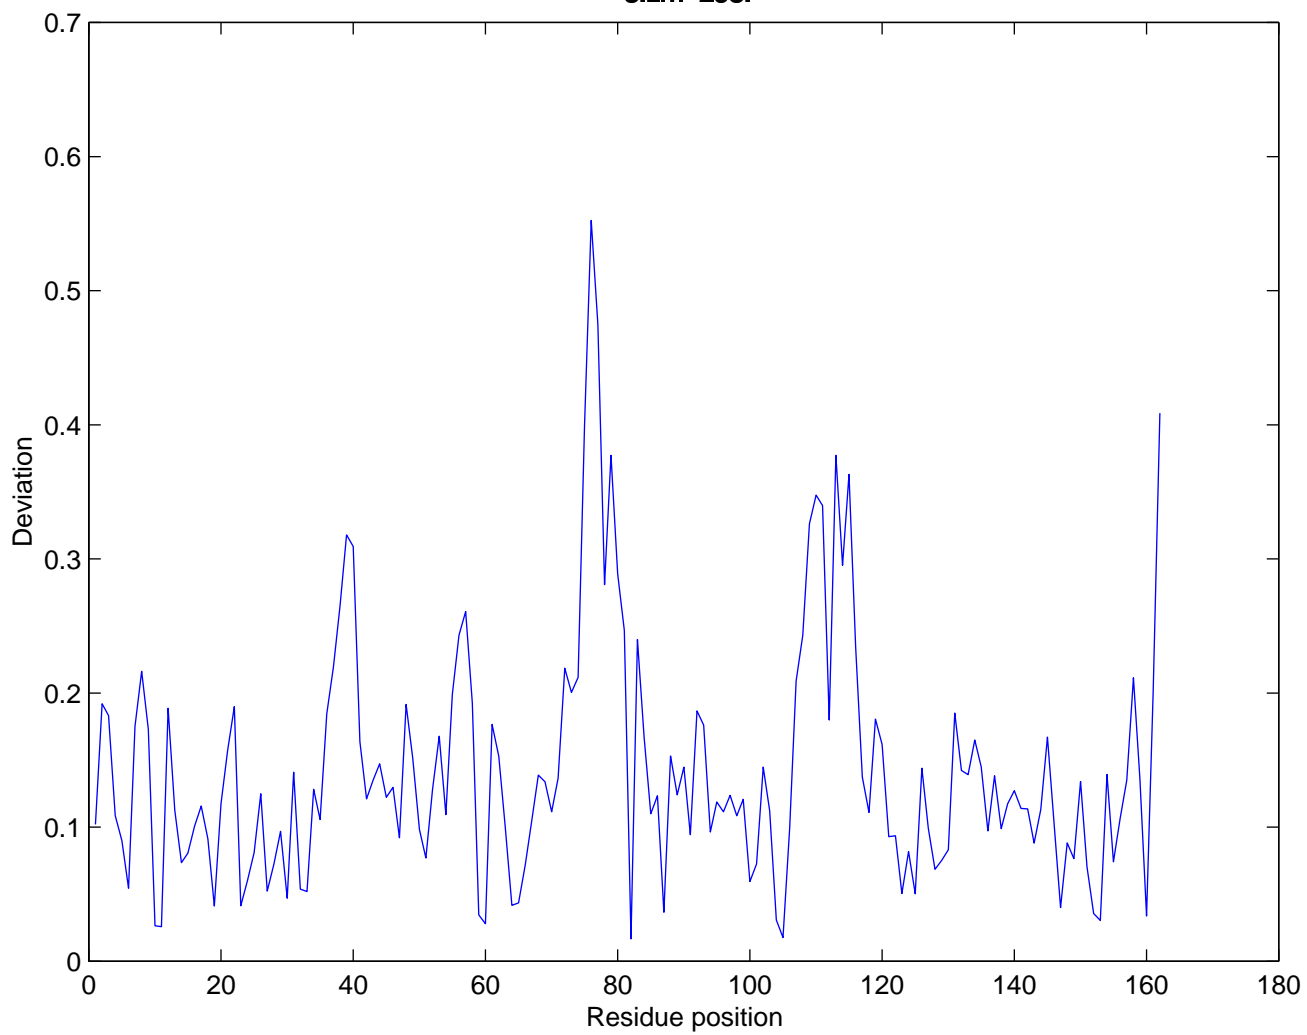

105m-101m

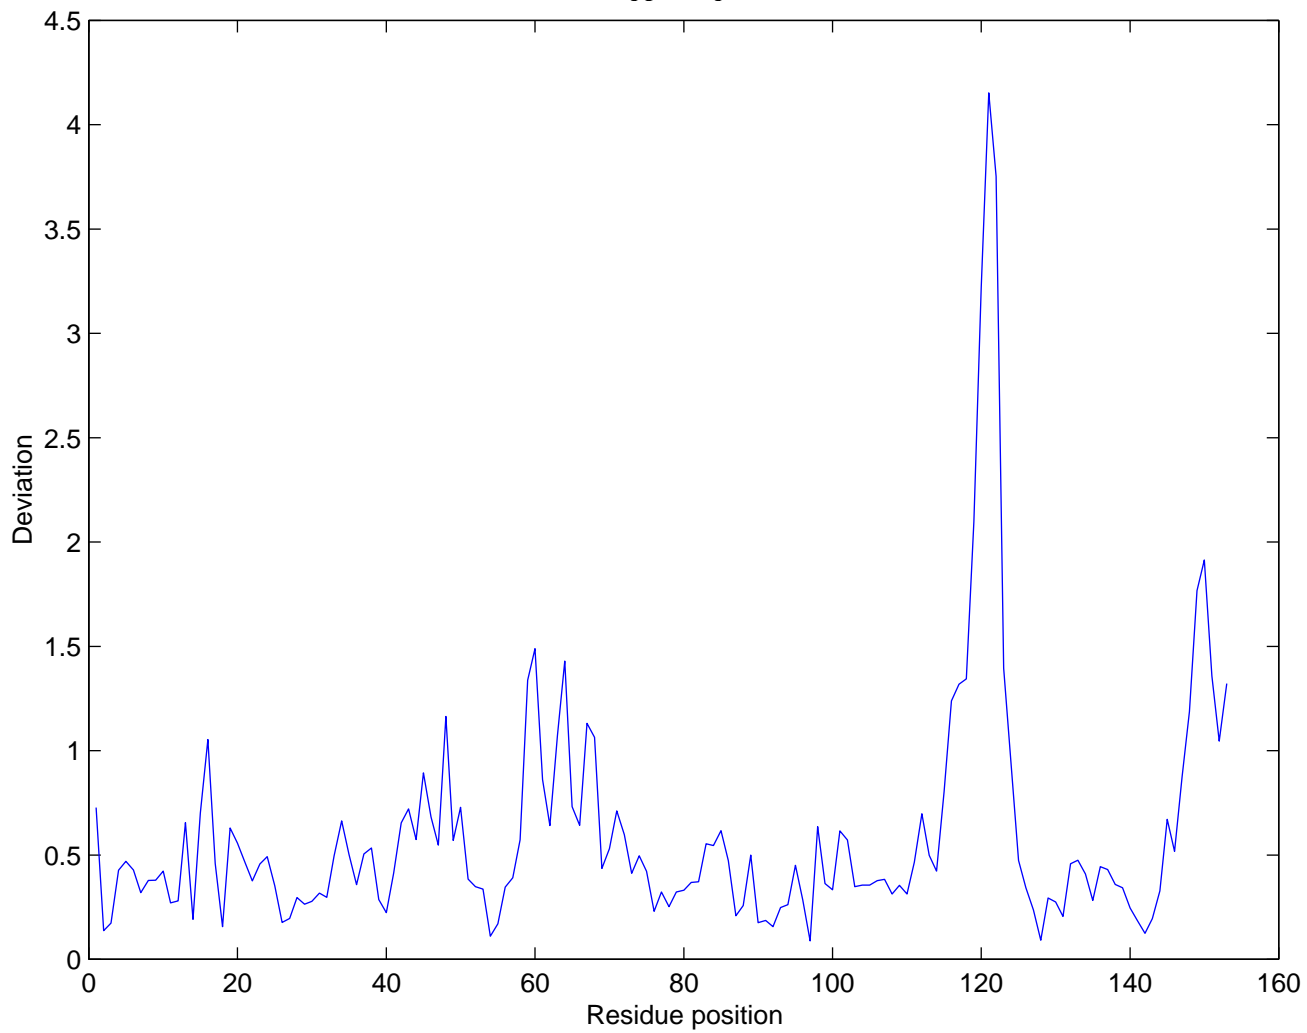

105m-1ch5

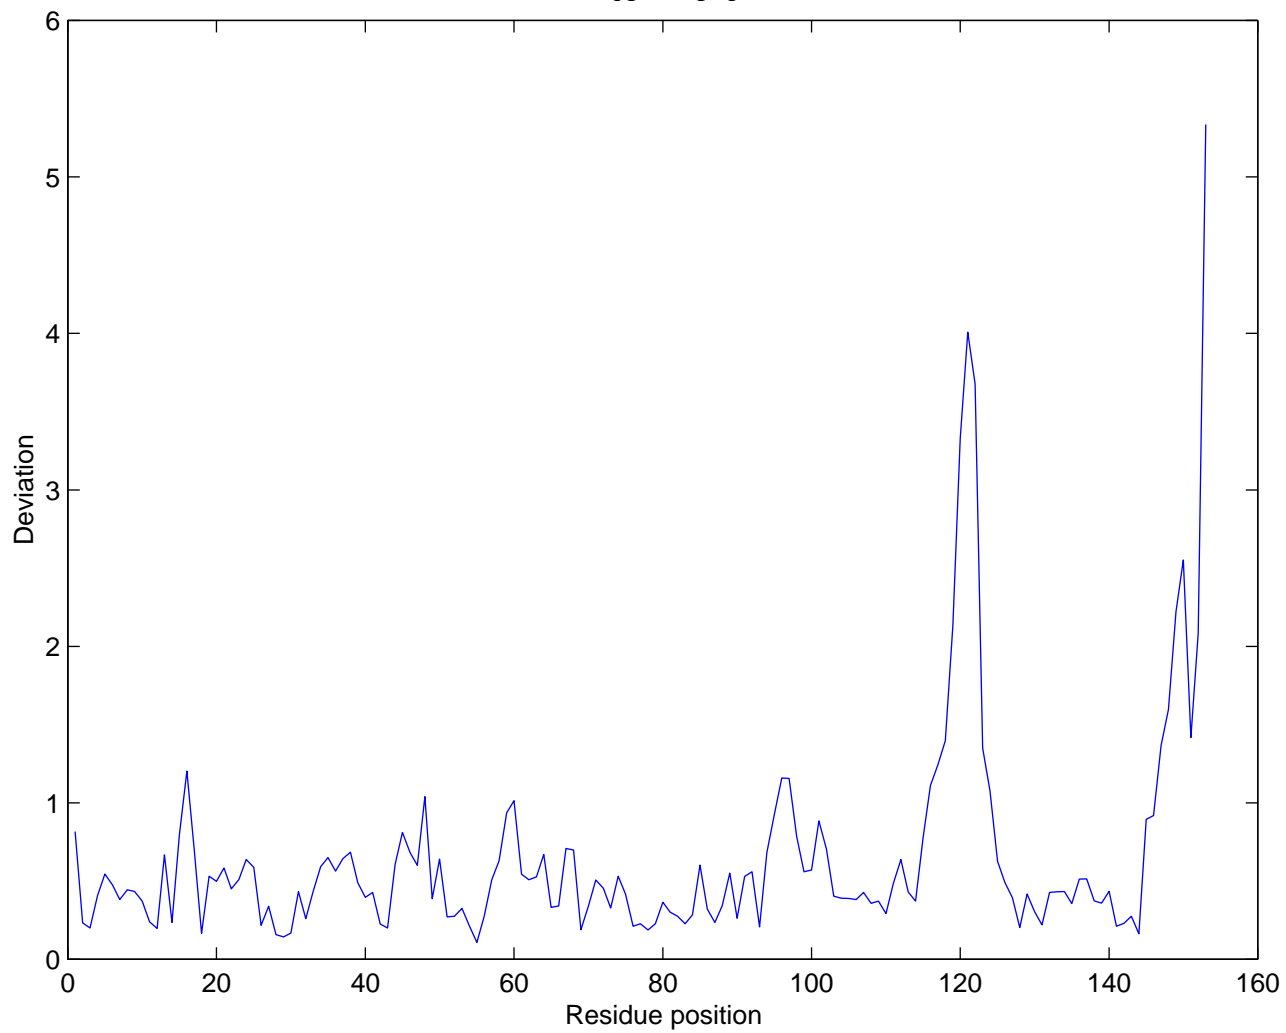

Supplement: pnas_98_6_3139__8.pdf [file pnas_98_6_3139__8.pdf]
